# Supplementary material for: Aliphatic sulfonyl fluoride synthesis via reductive decarboxylative fluorosulfonylation of aliphatic carboxylic acid NHPI esters
Source: Royal Society of Chemistry journal article supplement (doi:10.1039/d1qo01655e), 2022-01-01
Supplement: d1qo01655e1.pdf [file d1qo01655e1.pdf]

## Supporting Information

### Aliphatic sulfonyl fluoride synthesis via reductive decarboxylative fluorosulfonylation of aliphatic carboxylic acids NHPI esters

Zhanhu Ma,<sup>a</sup> Yongan Liu,<sup>b</sup> Xiaoyu Ma,<sup>\*a</sup> Xiaojun Hu,<sup>\*a</sup> Yong Guo,<sup>b</sup> Qing-Yun Chen<sup>b</sup> and Chao Liu<sup>\*a,b</sup>

<sup>a</sup>School of Chemical and Environmental Engineering, Shanghai Institute of Technology, 100 Haiquan Road, Shanghai 201418, China

<sup>b</sup>Key Laboratory of Organofluorine Chemistry, Shanghai Institute of Organic Chemistry, University of Chinese Academy of Sciences, Chinese Academy of Sciences, 345 Lingling Road, Shanghai 200032, China

E-mail: [\\*chaoliu@sit.edu.cn](mailto:chaoliu@sit.edu.cn); [\\*maxiaoyu@sit.edu.cn](mailto:maxiaoyu@sit.edu.cn); [\\*hu-xj@mail.tsinghua.edu.cn](mailto:hu-xj@mail.tsinghua.edu.cn)

## Tables of contents

|                                                                                                                                                   |    |
|---------------------------------------------------------------------------------------------------------------------------------------------------|----|
| I. General information .....                                                                                                                      | 2  |
| II. Screening reaction conditions for Fluorosulfonylation of alkyl carboxylic acids.....                                                          | 3  |
| III. General procedures for synthesis of aliphatic carboxylic acid NHPI redox-active esters.....                                                  | 7  |
| IV. General procedures for the reductive decarboxylative fluorosulfonylation of various aliphatic carboxylic acids .....                          | 7  |
| V. General procedures for derivatization of sulfonyl fluorides <b>2c</b> , <b>2n</b> , <b>2w</b> , <b>2x</b> , and <b>2y</b> with 1-naphthol..... | 8  |
| VI. Analytical data for compounds <b>2a–x</b> , <b>2aa–gg</b> .....                                                                               | 8  |
| VII. Scale-up and derivatization reactions of the aliphatic sulfonyl fluoride <b>2v</b> .....                                                     | 20 |
| VIII. Preliminary mechanistic studies.....                                                                                                        | 24 |
| IX. Reference .....                                                                                                                               | 26 |
| X. Copies of <sup>1</sup> H, <sup>19</sup> F, and <sup>13</sup> C NMR spectra .....                                                               | 27 |
| XI. Single crystal structure data of <b>2u</b> .....                                                                                              | 76 |

## I. General information

The solvents were dried and distilled by the standard methods, other commercially available reagents were purchased and used without further purification.  $^1\text{H}$  NMR ( $(\text{CH}_3)_4\text{Si}$  (TMS) as the internal standard) and  $^{19}\text{F}$  NMR spectra ( $\text{CFCl}_3$  as the outside standard and low field is positive) were recorded on a 400MHz spectrometer.  $^{13}\text{C}$  NMR also was recorded on 400MHz spectrometer. Data for  $^1\text{H}$  NMR spectra are reported as follows: chemical shift (multiplicity, coupling constants, number of hydrogens). Abbreviations are as follows: s (singlet), d (doublet), t (triplet), q (quartet), m (multiplet), br (broad). The NMR yield was determined by  $^{19}\text{F}$  NMR using 1-methoxy-4-(trifluoromethoxy) benzene ( $^{19}\text{F}$  NMR:  $\delta$  -58.4 ppm) as an internal standard before working up the reaction. GC-MS (EI) data were determined on an Agilent 5975C. LRMS (EI) and HRMS (EI) data were tested on a Waters Micromass GCT Premier.

## II. Screening reaction conditions for Fluorosulfonylation of alkyl carboxylic acids

**Table S1. Initial attempt<sup>a</sup>**

| Entry | “SO <sub>2</sub> ”                            | “F”  | Zinc (mol%) | Solvent              | Yield (%) <sup>b</sup> |
|-------|-----------------------------------------------|------|-------------|----------------------|------------------------|
| 1     | Na <sub>2</sub> S <sub>2</sub> O <sub>4</sub> | NFSI | 0           | DMF/H <sub>2</sub> O | 30                     |
| 2     | Na <sub>2</sub> S <sub>2</sub> O <sub>4</sub> | NFSI | 10          | DMF/H <sub>2</sub> O | 40                     |

<sup>a</sup> Reaction conditions: **1m** (0.1 mmol, 1.0 equiv.), Na<sub>2</sub>S<sub>2</sub>O<sub>4</sub> (0.15 mmol, 1.5 equiv.), Zinc (0.01 mmol, 10 mol%), DMF : H<sub>2</sub>O (1.0 : 0.3 mL), Ar atmosphere, 80 °C, 9 h, and then NFSI (0.3 mmol, 3.0 equiv.), RT, 4 h. <sup>b</sup>Yields were determined by <sup>19</sup>F NMR spectroscopy using 1-methoxy-4-(trifluoromethoxy)benzene as an internal standard.

**Table S2. Screening the solvents<sup>a</sup>**

| Entry | Solvents | Yield (%) <sup>b</sup> |
|-------|----------|------------------------|
| 1     | DMF      | 40                     |
| 2     | DMSO     | 7                      |
| 3     | DMAc     | 59                     |
| 4     | NMP      | 45                     |
| 5     | DCM      | 0                      |
| 6     | THF      | 17                     |
| 7     | Toluene  | 0                      |

<sup>a</sup> Reaction conditions: **1m** (0.1 mmol, 1.0 equiv.), Na<sub>2</sub>S<sub>2</sub>O<sub>4</sub> (0.15 mmol, 1.5 equiv.), Zinc (0.01 mmol, 10 mol%), Solvent : H<sub>2</sub>O (1.0 : 0.3 mL), Ar atmosphere, 80 °C, 9 h, and then NFSI (0.3 mmol, 3.0 equiv.), RT, 4 h. <sup>b</sup>Yields were determined by <sup>19</sup>F NMR spectroscopy using 1-methoxy-4-(trifluoromethoxy)benzene as an internal standard.

**Table S3. Screening the additives<sup>a</sup>**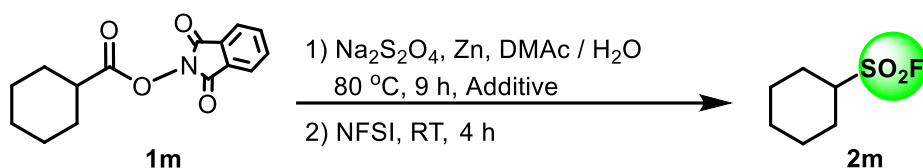

| Entry | Additive                         | Yield (%) <sup>b</sup> |
|-------|----------------------------------|------------------------|
| 1     | $\text{Na}_2\text{CO}_3$         | 61                     |
| 2     | NaOH                             | 0                      |
| 3     | $\text{BF}_3 \cdot \text{OEt}_2$ | 6                      |
| 4     | $\text{CH}_3\text{COOH}$         | 0                      |

<sup>a</sup> Reaction conditions: **1m** (0.1 mmol, 1.0 equiv.),  $\text{Na}_2\text{S}_2\text{O}_4$  (0.15 mmol, 1.5 equiv.), Zinc (0.01 mmol, 10 mol%), DMAc :  $\text{H}_2\text{O}$  (1.0 : 0.3 mL), additives (0.1 mmol, 1.0 equiv.), Ar atmosphere, 80 °C, 9 h, and then NFSI (0.3 mmol, 3.0 equiv.), RT, 4 h. <sup>b</sup>Yields were determined by  $^{19}\text{F}$  NMR spectroscopy using 1-methoxy-4-(trifluoromethoxy)benzene as an internal standard.

**Table S4. Survey on the amount of Zinc<sup>a</sup>**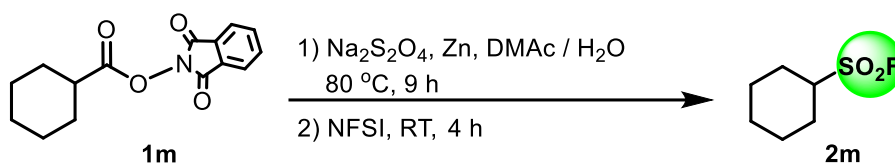

| Entry | Zinc (mol%) | Yield (%) <sup>b</sup> |
|-------|-------------|------------------------|
| 1     | 10          | 59                     |
| 2     | 100         | 52                     |
| 3     | 200         | 63                     |

<sup>a</sup> Reaction conditions: **1m** (0.1 mmol, 1.0 equiv.),  $\text{Na}_2\text{S}_2\text{O}_4$  (0.15 mmol, 1.5 equiv.), Zinc, DMAc :  $\text{H}_2\text{O}$  (1.0 : 0.3 mL), Ar atmosphere, 80 °C, 9 h, and then NFSI (0.3 mmol, 3.0 equiv.), RT, 4 h. <sup>b</sup>Yields were determined by  $^{19}\text{F}$  NMR spectroscopy using 1-methoxy-4-(trifluoromethoxy)benzene as an internal standard.

**Table S5. Survey on the amount of water<sup>a</sup>**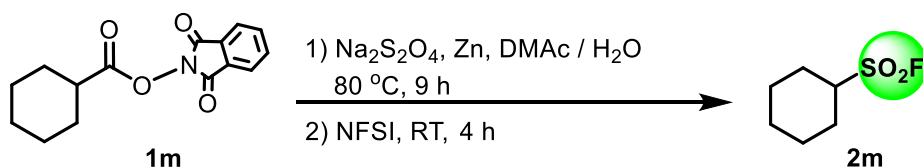

| Entry | $\text{H}_2\text{O}$ | Yield (%) <sup>b</sup> |
|-------|----------------------|------------------------|
|-------|----------------------|------------------------|

|   |     |    |
|---|-----|----|
| 1 | 0.1 | 25 |
| 2 | 0.2 | 46 |
| 3 | 0.3 | 56 |
| 4 | 0.4 | 64 |
| 5 | 0.5 | 54 |
| 6 | 0.6 | 52 |
| 7 | 0.7 | 49 |
| 8 | 0.8 | 48 |

<sup>a</sup> Reaction conditions: **1m** (0.2 mmol, 1.0 equiv.), Na<sub>2</sub>S<sub>2</sub>O<sub>4</sub> (0.3 mmol, 1.5 equiv.), Zinc (0.4 mmol, 2.0 equiv.), DMAc (2.0 mL): H<sub>2</sub>O, Ar atmosphere, 80 °C, 9 h, and then NFSI (0.6 mmol, 3.0 equiv.), RT, 4 h. <sup>b</sup>Yields were determined by <sup>19</sup>F NMR spectroscopy using 1-methoxy-4-(trifluoromethoxy)benzene as an internal standard.

**Table S6. Survey on the reaction temperatures<sup>a</sup>**

1) Na<sub>2</sub>S<sub>2</sub>O<sub>4</sub>, Zn, DMAc / H<sub>2</sub>O  
Temp., 9 h

2) NFSI, RT, 4 h

**1m** → **2m**

| Entry | Temp. | Yield (%) <sup>b</sup> |
|-------|-------|------------------------|
| 1     | RT    | 7                      |
| 2     | 60    | 50                     |
| 3     | 80    | 63                     |
| 4     | 100   | 58                     |

<sup>a</sup> Reaction conditions: **1m** (0.2 mmol, 1.0 equiv.), Na<sub>2</sub>S<sub>2</sub>O<sub>4</sub> (0.3 mmol, 1.5 equiv.), Zinc (0.4 mmol, 2.0 equiv.), DMAc : H<sub>2</sub>O (2.0 : 0.4 mL), Ar atmosphere, Temp., 9 h, and then NFSI (0.6 mmol, 3.0 equiv.), RT, 4 h. <sup>b</sup>Yields were determined by <sup>19</sup>F NMR spectroscopy using 1-methoxy-4-(trifluoromethoxy)benzene as an internal standard.

**Table S7. Survey on the effect of solvent<sup>a</sup>**

1) Na<sub>2</sub>S<sub>2</sub>O<sub>4</sub>, Zn, Solvents / H<sub>2</sub>O  
80 °C, 9 h

2) NFSI, RT, 4 h

**1m** → **2m**

| Entry | Solvent | Yield (%) <sup>b</sup> |
|-------|---------|------------------------|
| 1     | DMAc    | 64                     |
| 2     | DMPPr   | 78                     |

<sup>a</sup> Reaction conditions: **1m** (0.2 mmol, 1.0 equiv.), Na<sub>2</sub>S<sub>2</sub>O<sub>4</sub> (0.3 mmol, 1.5 equiv.), Zinc (0.4 mmol, 2.0 equiv.), Solvent : H<sub>2</sub>O (2.0 : 0.4 mL), Ar atmosphere, 80 °C, 9 h, and then NFSI (0.6 mmol, 3.0 equiv.), RT, 4 h. <sup>b</sup>Yields were determined by <sup>19</sup>F NMR spectroscopy using 1-methoxy-4-(trifluoromethoxy)benzene as an internal standard.

**Table S8. Optimization of the reaction conditions<sup>a</sup>**

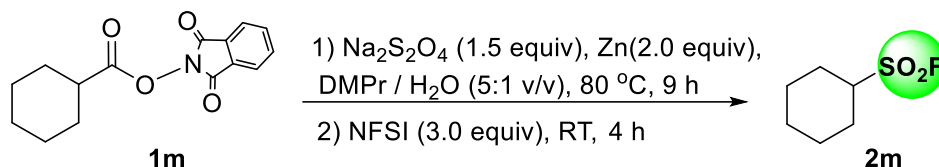

| entry | variations from the standard conditions                                                               | yield (%) <sup>b</sup> |
|-------|-------------------------------------------------------------------------------------------------------|------------------------|
| 1     | none                                                                                                  | 76                     |
| 2     | DABSO instead of Na <sub>2</sub> S <sub>2</sub> O <sub>4</sub>                                        | 20                     |
| 3     | K <sub>2</sub> S <sub>2</sub> O <sub>5</sub> instead of Na <sub>2</sub> S <sub>2</sub> O <sub>4</sub> | 21                     |
| 4     | 10 eq. SO <sub>2</sub> gas instead of Na <sub>2</sub> S <sub>2</sub> O <sub>4</sub>                   | 0                      |
| 5     | without Zn                                                                                            | 47                     |
| 6     | Cu instead of Zn                                                                                      | 18                     |
| 7     | Mn instead of Zn                                                                                      | 40                     |
| 8     | CH <sub>3</sub> CN instead of DMPPr                                                                   | 55                     |
| 9     | DMF instead of DMPPr                                                                                  | 50                     |
| 10    | without H <sub>2</sub> O                                                                              | 0                      |
| 11    | 20 °C                                                                                                 | 6                      |
| 12    | 60 °C                                                                                                 | 45                     |
| 13    | 100 °C                                                                                                | 61                     |

<sup>a</sup> Reaction conditions: **1m** (0.2 mmol), Na<sub>2</sub>S<sub>2</sub>O<sub>4</sub> (0.3 mmol), Zinc (0.4 mmol), DMPPr/H<sub>2</sub>O (2.0 mL, 5/1 v/v), Ar atmosphere, 80 °C, 9 h, then NFSI (0.6 mmol), room temperature, 4 h. <sup>b</sup>Yields were determined by <sup>19</sup>F NMR spectroscopy using 1-methoxy-4-(trifluoromethoxy)benzene as an internal standard.

### III. General procedures for synthesis of aliphatic carboxylic acid NHPI redox-active esters

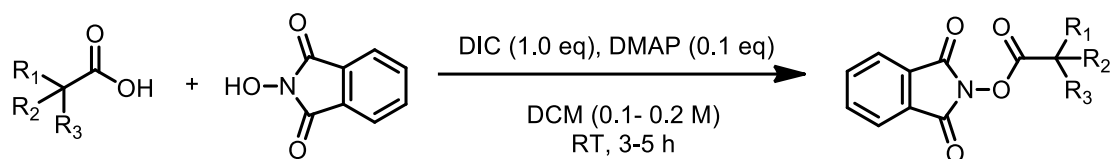

Various aliphatic carboxylic acid NHPI esters were prepared according to the known procedures.<sup>[1]</sup> Aliphatic carboxylic acid (5 mmol, 1.0 equiv.), N-hydroxyphthalimide (5 - 5.5 mmol, 1.0 - 1.1 equiv.), DMAP (0.5 mmol, 0.1 equiv.) and dichloromethane (50 mL) was added to an round-bottomed flask, and the mixture was stirred vigorously. DIC (5.5 mmol, 1.1 equiv.) was then added and the mixture was stirred for 3-5 h. The mixture was filtered through a pad of Celite or silica gel, and rinsed with DCM. The filtrate was collected and dried under reduced pressure. Purification of the resulting residue by column chromatography afforded the desired aliphatic carboxylic acid NHPI ester products.

### IV. General procedures for the reductive decarboxylative fluorosulfonylation of various aliphatic carboxylic acids

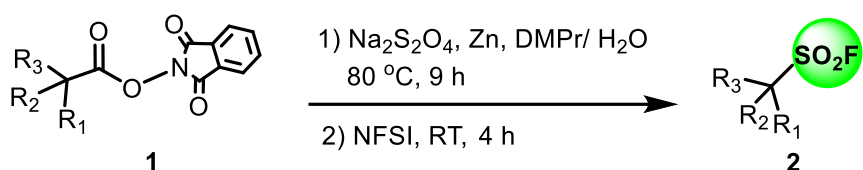

R-COO-NHPI **1** (0.4 mmol, 1.0 equiv.), Na<sub>2</sub>S<sub>2</sub>O<sub>4</sub> (0.6 mmol, 1.5 equiv.), zinc (0.8 mmol, 2 equiv.) were added to an oven-dried sealed tube (10 mL) equipped with a magnetic stirring bar. The tube was evacuated and backfilled with Ar (3 times) and DMP (N,N'-Dimethylpropionamide) : H<sub>2</sub>O (4 : 0.8 mL) was added via syringe under Ar atmosphere. The mixture was sealed and stirred smoothly at 80 °C for 9 h. After cooled to room temperature, NFSI (1.2 mmol, 1.5 equiv.) was added and the reaction mixture was stirred at room temperature for 4 h. Yields of the desired product were

measured by  $^{19}\text{F}$  NMR spectroscopy before working-up. Then the reaction mixture was filtered through a pad of celite, diluted with DCM (20 mL) and  $\text{H}_2\text{O}$  (50 mL). The resulting mixture was extracted with DCM ( $2 \times 20$  mL). The organic layers were combined, washed with brine (50 mL), dried over  $\text{Na}_2\text{SO}_4$ , filtered and concentrated. The crude product was purified by silica gel column chromatography to give the desired product.

## V. General procedures for derivatization of sulfonyl fluorides **2c**, **2n**, **2w**, **2x**, and **2y** with 1-naphthol

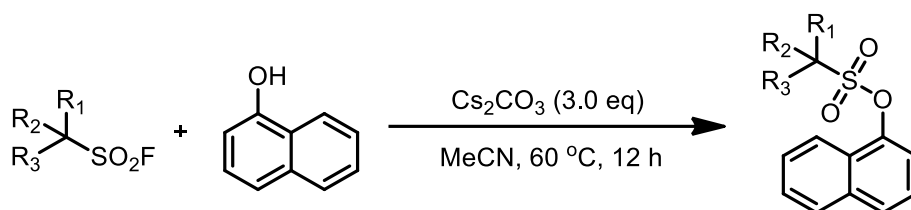

For aliphatic sulfonyl fluorides **2c**, **2n**, **2w**, **2x**, and **2y**, their derivatization with 1-naphthol was performed to unambiguously characterize them due to their high volatility or unstability. After the reductive decarboxylative fluorosulfonylation reaction was complete (see general procedure IV), the crude product was filtered, washed with water, extracted with DCM, and concentrated under reduced pressure. The resulting crude product was dissolved in  $\text{CH}_3\text{CN}$  (4 mL). 1-Naphthol (3 equiv.) and cesium carbonate (3 equiv.) were added subsequently. The reaction mixture was stirred and heated to  $60\text{ }^\circ\text{C}$  for 12 h. After cooled to room temperature, the reaction mixture was filtered through a pad of celite, diluted with DCM (20 mL) and  $\text{H}_2\text{O}$  (50 mL). The resulting mixture was extracted with DCM ( $2 \times 20$  mL). The organic layers were combined, washed with brine (50 mL), dried over  $\text{Na}_2\text{SO}_4$ , filtered and concentrated. The crude product was purified by silica gel chromatography to give the desired product.

## VI. Analytical data for compounds **2a–x**, **2aa–gg**



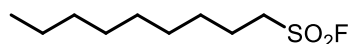

**nonane-1-sulfonyl fluoride (2a):** Obtained as a colorless oil in 58% yield (97.1 mg) by silica gel flash column chromatography eluted with petroleum ether: dichloromethane = 25:4 v/v.  $^1\text{H}$  NMR (400 MHz,  $\text{CDCl}_3$ ):  $\delta$  3.41 – 3.29 (m, 2H), 2.01 – 1.86 (m, 2H), 1.53 – 1.41 (m, 2H), 1.40 – 1.17 (m, 10H), 0.88 (t,  $J$  = 6.8 Hz, 3H).  $^{19}\text{F}$  NMR (376 MHz,  $\text{CDCl}_3$ ):  $\delta$  53.15 (t,  $J$  = 3.8 Hz, 0.94F), 53.11 (t,  $J$  = 3.8 Hz, 0.06F).  $^{13}\text{C}$  NMR (101 MHz,  $\text{CDCl}_3$ ):  $\delta$  51.0 (d,  $J$  = 16.2 Hz), 31.9, 29.2, 29.2, 28.9, 28.0, 23.5, 22.8, 14.2 ppm. HRMS (FI)  $m/z$ :  $[\text{M}]^+$  Calcd for  $\text{C}_9\text{H}_{19}\text{O}_2\text{FS}$  210.1084; Found 210.1083. The analytical data are consistent with literature values.<sup>[3]</sup>

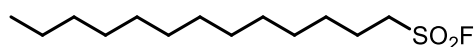

**tridecane-1-sulfonyl fluoride (2b):** Obtained as a white solid (m.p. 31–32 °C) in 60% yield (63.8 mg) by silica gel flash column chromatography eluted with petroleum ether: dichloromethane = 50:3 v/v.  $^1\text{H}$  NMR (400 MHz,  $\text{CDCl}_3$ ):  $\delta$  3.39 – 3.32 (m, 2H), 1.99 – 1.89 (m, 2H), 1.52 – 1.42 (m, 2H), 1.39 – 1.17 (m, 18H), 0.88 (t,  $J$  = 6.8 Hz, 3H).  $^{19}\text{F}$  NMR (376 MHz,  $\text{CDCl}_3$ ):  $\delta$  53.13 (t,  $J$  = 3.8 Hz, 0.94F), 53.08 (t,  $J$  = 3.8 Hz, 0.06F).  $^{13}\text{C}$  NMR (101 MHz,  $\text{CDCl}_3$ ):  $\delta$  51.1 (d,  $J$  = 16.2 Hz), 32.0, 29.8, 29.8, 29.7, 29.6, 29.5, 29.3, 29.0, 28.0, 23.5, 22.8, 14.2 ppm. HRMS (EI)  $m/z$ :  $[\text{M}]^+$  Calcd for  $\text{C}_{13}\text{H}_{27}\text{O}_2\text{FS}$  266.1710; Found 266.1717.

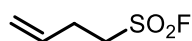

**but-3-ene-1-sulfonyl fluoride (2c):** Obtained in 50%  $^{19}\text{F}$  NMR yield. Crude  $^{19}\text{F}$  NMR (376 MHz)  $\delta$  53.9 ppm. HRMS (EI)  $m/z$ :  $[\text{M}]^+$  Calcd for  $\text{C}_8\text{H}_8\text{O}_2\text{BrFS}$  138.0145; Found 138.0147. Due to its high volatility, its derivatization with 1-naphthol was performed to unambiguously characterize it (See characterization data of **2cc**).

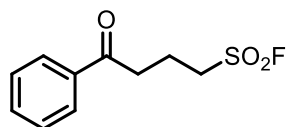

**4-oxo-4-phenylbutane-1-sulfonyl fluoride (2d):** Obtained as a white solid (m.p. 97 – 98 °C) in 50% yield (46.0 mg) by silica gel flash column chromatography eluted with petroleum ether: ethyl acetate = 5:1 v/v.  $^1\text{H}$  NMR (400 MHz,  $\text{CDCl}_3$ ):  $\delta$  7.95 (d,  $J$  = 8.5 Hz, 2H), 7.60 (t,  $J$  = 7.4 Hz, 1H), 7.48 (t,  $J$  = 7.7 Hz, 2H), 3.63 – 3.52 (m, 2H), 3.26 (t,  $J$  = 6.5 Hz, 2H), 2.46 – 2.33 (m, 2H).  $^{19}\text{F}$  NMR (376 MHz,  $\text{CDCl}_3$ ):  $\delta$  58.63 (t,  $J$  = 3.8 Hz, 0.94F), 58.58 (t,  $J$  = 3.8 Hz, 0.06F).  $^{13}\text{C}$  NMR (101 MHz,  $\text{CDCl}_3$ ):  $\delta$  197.9, 136.3,

133.8, 128.9, 128.1, 50.2 (d,  $J = 17.2$  Hz), 35.5, 18.0 ppm. HRMS (EI)  $m/z$ :  $[M]^+$  Calcd for  $C_{10}H_{11}O_3FS$  230.0407; Found 230.0409.

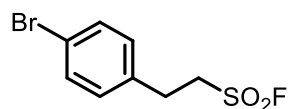

**2-(4-bromophenyl)ethanesulfonyl fluoride (2e):** Obtained as a white solid (m.p. 63-64 °C) in 49% yield (52.1 mg) by silica gel flash column chromatography eluted with petroleum ether: dichloromethane= 5:1 v/v.  $^1H$  NMR (400 MHz,  $CDCl_3$ ):  $\delta$  7.48 (d,  $J = 8.4$  Hz, 2H), 7.10 (d,  $J = 8.5$  Hz, 2H), 3.62 – 3.55 (m, 2H), 3.22 – 3.15 (m, 2H).  $^{19}F$  NMR (376 MHz,  $CDCl_3$ ):  $\delta$  53.72 (t,  $J = 3.8$  Hz, 0.94F), 53.68 (t,  $J = 3.8$  Hz, 0.06F).  $^{13}C$  NMR (101 MHz,  $CDCl_3$ ):  $\delta$  135.0, 132.4, 130.2, 121.8, 51.9 (d,  $J = 16.2$  Hz), 29.2 ppm. HRMS (FI)  $m/z$ :  $[M]^+$  Calcd for  $C_8H_8O_2BrFS$  265.9407; Found 265.9402. The analytical data are consistent with literature values.<sup>[4]</sup>

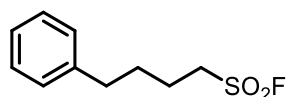

**4-phenylbutane-1-sulfonyl fluoride (2f):** Obtained as a white solid (m.p. 30-31 °C) in 63% yield (54.5 mg) by silica gel flash column chromatography eluted with petroleum ether: dichloromethane= 25:4 v/v.  $^1H$  NMR (400 MHz,  $CDCl_3$ ):  $\delta$  7.32 (t,  $J = 7.3$  Hz, 2H), 7.23 (t,  $J = 7.4$  Hz, 1H), 7.19 (d,  $J = 6.9$  Hz, 2H), 3.41 – 3.32 (m, 2H), 2.69 (t,  $J = 7.5$  Hz, 2H), 2.04 – 1.93 (m, 2H), 1.88 – 1.78 (m, 2H).  $^{19}F$  NMR (376 MHz,  $CDCl_3$ ):  $\delta$  53.54 (t,  $J = 3.8$  Hz, 0.94F), 53.49 (t,  $J = 3.8$  Hz, 0.06F).  $^{13}C$  NMR (101 MHz,  $CDCl_3$ ):  $\delta$  140.8, 128.7, 128.5, 126.4, 50.8 (d,  $J = 16.2$  Hz), 35.2, 29.6, 23.1 ppm. HRMS (FI)  $m/z$ :  $[M]^+$  Calcd for  $C_{10}H_{13}O_2FS$  216.0615; Found 216.0612. The analytical data are consistent with literature values.<sup>[5]</sup>

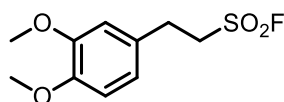

**2-(3,4-dimethoxyphenyl)ethanesulfonyl fluoride (2g):** Obtained as a white solid (m.p. 100-101 °C) in 50% yield (46.0 mg) by silica gel flash column chromatography eluted with petroleum ether: ethyl acetate= 10:1 v/v.  $^1H$  NMR (400 MHz,  $CDCl_3$ ):  $\delta$  6.83 (d,  $J = 8.2$  Hz, 1H), 6.80 – 6.74 (m, 1H), 6.72 (d,  $J = 1.9$  Hz, 1H), 3.88 (d,  $J = 5.5$  Hz, 6H), 3.65 – 3.55 (m, 2H), 3.23 – 3.14 (m, 2H).  $^{19}F$  NMR (376 MHz,  $CDCl_3$ ):  $\delta$  53.31 (t,  $J = 3.8$  Hz, 0.94F), 53.27 (t,  $J = 3.8$  Hz, 0.06F).  $^{13}C$  NMR (101 MHz,  $CDCl_3$ ):  $\delta$  149.5,

148.6, 128.5, 120.6, 111.7, 111.6, 56.1, 52.5 (d,  $J = 15.2$  Hz), 29.4 ppm. HRMS (EI)  $m/z$ :  $[M]^+$  Calcd for  $C_{10}H_{13}O_4FS$  248.0513; Found 248.0520.

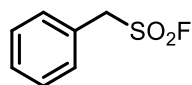

**phenylmethanesulfonyl fluoride (2h):** Obtained as a white solid (m.p. 86-87 °C) in 68% yield (43.8 mg) by silica gel flash column chromatography eluted with petroleum ether: dichloromethane= 25:4 v/v.  $^1H$  NMR (400 MHz,  $CDCl_3$ ):  $\delta$  7.49 – 7.40 (m, 5H), 4.60 (d,  $J = 3.2$  Hz, 2H).  $^{19}F$  NMR (376 MHz,  $CDCl_3$ ):  $\delta$  51.31 (t,  $J = 3.8$  Hz, 0.94F), 51.26 (t,  $J = 3.8$  Hz, 0.06F).  $^{13}C$  NMR (101 MHz,  $CDCl_3$ ):  $\delta$  130.8, 130.0, 129.4, 125.6, 56.9 (d,  $J = 16.2$  Hz) ppm. HRMS (EI)  $m/z$ :  $[M]^+$  Calcd for  $C_7H_7O_2FS$  174.0145; Found 174.0150. The analytical data are consistent with literature values.<sup>[6]</sup>

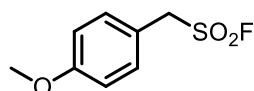

**(4-methoxyphenyl)methanesulfonyl fluoride (2i):** Obtained as a white solid (m.p. 87-88 °C) in 71% yield (58.0 mg) by silica gel flash column chromatography eluted with petroleum ether: dichloromethane= 25:4 v/v.  $^1H$  NMR (400 MHz,  $CDCl_3$ ):  $\delta$  7.34 (d,  $J = 8.5$  Hz, 2H), 6.95 (d,  $J = 8.6$  Hz, 2H), 4.54 (d,  $J = 2.9$  Hz, 2H), 3.83 (s, 3H).  $^{19}F$  NMR (376 MHz,  $CDCl_3$ ):  $\delta$  50.25 (t,  $J = 3.8$  Hz, 0.94F), 50.21 (t,  $J = 3.8$  Hz, 0.06F).  $^{13}C$  NMR (101 MHz,  $CDCl_3$ ):  $\delta$  160.9, 132.1, 117.3, 114.9, 56.6 (d,  $J = 17.2$  Hz), 55.5 ppm. HRMS (EI)  $m/z$ :  $[M]^+$  Calcd for  $C_8H_9O_3N_2FS$  204.0251; Found 204.0252.

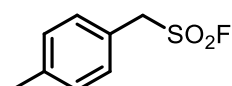

**p-tolylmethanesulfonyl fluoride (2j):** Obtained as a white solid (m.p. 135-136 °C) in 70% yield (52.6 mg) by silica gel flash column chromatography eluted with petroleum ether: dichloromethane= 5:1 v/v.  $^1H$  NMR (400 MHz,  $CDCl_3$ ):  $\delta$  7.30 (d,  $J = 8.0$  Hz, 2H), 7.23 (d,  $J = 8.2$  Hz, 2H), 4.54 (d,  $J = 3.2$  Hz, 2H), 2.37 (s, 3H).  $^{19}F$  NMR (376 MHz,  $CDCl_3$ ):  $\delta$  55.64 (t,  $J = 3.8$  Hz, 0.94F), 55.60 (t,  $J = 3.8$  Hz, 0.06F).  $^{13}C$  NMR (101 MHz,  $CDCl_3$ ):  $\delta$  140.2, 130.6, 130.1, 122.5, 56.7 (d,  $J = 17.2$  Hz), 21.4 ppm. HRMS (EI)  $m/z$ :  $[M]^+$  Calcd for  $C_8H_9FO_2S$  188.0302; Found 188.0301.

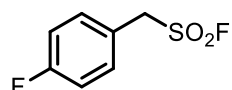

**(4-fluorophenyl)methanesulfonyl fluoride (2k):** Obtained as a white solid (m.p. 94-95 °C) in 66% yield (49.9 mg) by silica gel flash column chromatography eluted with petroleum ether: dichloromethane= 5:1 v/v. <sup>1</sup>H NMR (400 MHz, CDCl<sub>3</sub>): δ 7.42 (dd, *J* = 8.5, 5.2 Hz, 2H), 7.13 (t, *J* = 8.6 Hz, 2H), 4.58 (d, *J* = 3.1 Hz, 2H). <sup>19</sup>F NMR (376 MHz, CDCl<sub>3</sub>): δ 50.96 (t, *J* = 3.8 Hz, 0.94F), 50.92 (t, *J* = 3.8 Hz, 0.06F), -110.7 – -110.5 (m, 1F). <sup>13</sup>C NMR (101 MHz, CDCl<sub>3</sub>): δ 163.8 (d, *J* = 251.5 Hz), 132.7 (d, *J* = 9.1 Hz), 121.5 (d, *J* = 3.0 Hz), 116.6 (d, *J* = 22.2 Hz), 56.2 (d, *J* = 16.2 Hz) ppm. HRMS (EI) *m/z*: [M]<sup>+</sup> Calcd for C<sub>7</sub>H<sub>6</sub>O<sub>2</sub>F<sub>2</sub>S 192.0051; Found 192.0047.

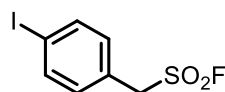

**(4-iodophenyl)methanesulfonyl fluoride (2l):** Obtained as a white solid (m.p. 179-180 °C) in 20% yield (24.0 mg) by silica gel flash column chromatography eluted with petroleum ether: dichloromethane= 10:3 v/v. <sup>1</sup>H NMR (400 MHz, CDCl<sub>3</sub>): δ 7.79 (d, *J* = 8.2 Hz, 2H), 7.17 (d, *J* = 8.1 Hz, 2H), 4.53 (s, 2H). <sup>19</sup>F NMR (376 MHz, CDCl<sub>3</sub>): δ 51.68 (s, 0.94F), 50.92 (s, 0.06F). <sup>13</sup>C NMR (101 MHz, CDCl<sub>3</sub>): δ 138.7, 132.4, 125.2, 96.5, 56.4 (d, *J* = 18.3 Hz) ppm. HRMS (EI) *m/z*: [M]<sup>+</sup> Calcd for C<sub>7</sub>H<sub>6</sub>O<sub>2</sub>FIS 299.9112; Found 299.9116.

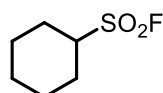

**cyclohexanesulfonyl fluoride (2m):** Obtained as a colorless oil in 66% yield (43.8 mg) by silica gel flash column chromatography eluted with petroleum ether: dichloromethane= 5:1 v/v. <sup>1</sup>H NMR (400 MHz, CDCl<sub>3</sub>): δ 3.30 (t, *J* = 12.6 Hz, 1H), 2.29 (d, *J* = 12.7 Hz, 2H), 1.95 (d, *J* = 13.0 Hz, 2H), 1.80 – 1.61 (m, 3H), 1.43 – 1.17 (m, 3H). <sup>19</sup>F NMR (376 MHz, CDCl<sub>3</sub>): δ 40.77 (s, 0.94F), 40.73 (s, 0.06F). <sup>13</sup>C NMR (101 MHz, CDCl<sub>3</sub>): δ 61.1 (d, *J* = 12.1 Hz), 26.6, 24.9, 24.8 ppm. HRMS (FI) *m/z*: [M+H]<sup>+</sup> Calcd for C<sub>6</sub>H<sub>12</sub>O<sub>2</sub>FS 167.0537; Found 167.0535. The analytical data are consistent with literature values.<sup>[10]</sup>

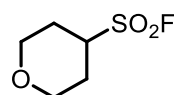

**tetrahydro-2H-pyran-4-sulfonyl fluoride (2n):** Obtained in 56% <sup>19</sup>F NMR yield. Crude <sup>19</sup>F NMR (376 MHz, CDCl<sub>3</sub>): δ 40.3 ppm. Due to its unstability, it can not be purified by silica gel flash column chromatography from impurities, and its

derivatization with 1-naphthol was then performed to unambiguously characterize it (See characterization data of **2dd**).

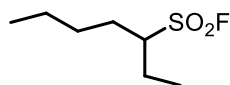

**heptane-3-sulfonyl fluoride (2o):** Obtained as a colorless oil in 85% yield (61.9 mg) by silica gel flash column chromatography eluted with petroleum ether: dichloromethane = 10:1 v/v.  $^1\text{H}$  NMR (400 MHz,  $\text{CDCl}_3$ ):  $\delta$  3.32 – 3.22 (m, 1H), 2.10 – 1.96 (m, 2H), 1.95 – 1.86 (m, 1H), 1.86 – 1.75 (m, 1H), 1.51 – 1.42 (m, 2H), 1.41 – 1.31 (m, 2H), 1.15 – 1.06 (m, 3H), 0.93 (t,  $J = 7.2$  Hz, 3H).  $^{19}\text{F}$  NMR (376 MHz,  $\text{CDCl}_3$ ):  $\delta$  48.74 (s, 0.94F), 48.70 (s, 0.06F).  $^{13}\text{C}$  NMR (101 MHz,  $\text{CDCl}_3$ ):  $\delta$  64.2 (d,  $J = 10.1$  Hz), 28.4, 22.5, 22.2, 13.8, 10.8 ppm. HRMS (FI)  $m/z$ :  $[\text{M}+\text{H}]^+$  Calcd for  $\text{C}_7\text{H}_{16}\text{O}_2\text{FS}$  183.0850; Found 183.0853.

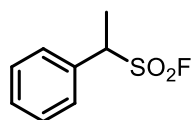

**phenylethanesulfonyl fluoride (2p):** Obtained as a colorless oil in 88% yield (66.2 mg) by silica gel flash column chromatography eluted with petroleum ether: dichloromethane = 5:1 v/v.  $^1\text{H}$  NMR (400 MHz,  $\text{CDCl}_3$ ):  $\delta$  7.45 (dq,  $J = 7.1, 3.9$  Hz, 5H), 4.71 – 4.61 (m, 1H), 1.94 (d,  $J = 7.2$  Hz, 3H).  $^{19}\text{F}$  NMR (376 MHz,  $\text{CDCl}_3$ ):  $\delta$  42.56 (s, 0.94F), 42.52 (s, 0.06F).  $^{13}\text{C}$  NMR (101 MHz,  $\text{CDCl}_3$ ):  $\delta$  131.5, 130.0, 129.3, 129.1, 63.2 (d,  $J = 12.2$  Hz), 16.1 ppm. HRMS (EI)  $m/z$ :  $[\text{M}]^+$  Calcd for  $\text{C}_8\text{H}_9\text{O}_2\text{FS}$  188.0302; Found 188.0229.

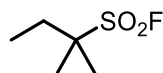

**2-methylbutane-2-sulfonyl fluoride (2q):** Obtained as a colorless oil in 60% yield (36.8 mg) by silica gel flash column chromatography eluted with petroleum ether: dichloromethane = 10:1 v/v.  $^1\text{H}$  NMR (400 MHz,  $\text{CDCl}_3$ ):  $\delta$  1.95 (qd,  $J = 7.5, 1.1$  Hz, 2H), 1.52 (s, 6H), 1.06 (td,  $J = 7.6, 0.9$  Hz, 3H).  $^{19}\text{F}$  NMR (376 MHz,  $\text{CDCl}_3$ ):  $\delta$  33.48 (s, 0.95F), 33.44 (s, 0.05F).  $^{13}\text{C}$  NMR (101 MHz,  $\text{CDCl}_3$ ):  $\delta$  65.0 (d,  $J = 9.0$  Hz), 29.9, 21.7, 8.3 ppm. HRMS (FI)  $m/z$ :  $[\text{M}+\text{H}]^+$  Calcd for  $\text{C}_5\text{H}_{11}\text{O}_2\text{FS}$  155.0536; Found 155.0531.

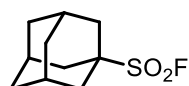

**(3s,5s,7s)-adamantane-1-sulfonyl fluoride (2r):** Obtained as a colorless oil in 48% yield (34.8 mg) by silica gel flash column chromatography eluted with petroleum ether: dichloromethane = 5:1 v/v.  $^1\text{H}$  NMR (400 MHz,  $\text{CDCl}_3$ ):  $\delta$  2.22 (s, 3H), 2.18 (s, 6H), 1.83 – 1.69 (m, 6H).  $^{19}\text{F}$  NMR (376 MHz,  $\text{CDCl}_3$ ):  $\delta$  26.44 (s, 0.94F), 26.40 (s, 0.06F).  $^{13}\text{C}$  NMR (101 MHz,  $\text{CDCl}_3$ ):  $\delta$  62.6 (d,  $J$  = 11.1 Hz), 36.1, 35.5, 28.0 ppm. HRMS (FI)  $m/z$ :  $[\text{M}-\text{H}]^+$  Calcd for  $\text{C}_{10}\text{H}_{14}\text{O}_2\text{FS}$  217.0693; Found 217.0690. The analytical data are consistent with literature values.<sup>[4]</sup>

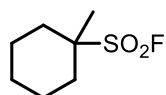

**1-methylcyclohexane-1-sulfonyl fluoride (2s):** Obtained as a colorless oil in 55% yield (39.6 mg) by silica gel flash column chromatography eluted with petroleum ether: dichloromethane = 10:1 v/v.  $^1\text{H}$  NMR (400 MHz,  $\text{CDCl}_3$ ):  $\delta$  2.02 (td,  $J$  = 12.8, 4.1 Hz, 2H), 1.89 (d,  $J$  = 13.0 Hz, 2H), 1.79 (dt,  $J$  = 13.1, 3.7 Hz, 2H), 1.70 (dt,  $J$  = 13.1, 3.7 Hz, 1H), 1.58 (s, 3H), 1.54 – 1.40 (m, 2H), 1.35 – 1.22 (m, 1H).  $^{19}\text{F}$  NMR (376 MHz,  $\text{CDCl}_3$ ):  $\delta$  29.0 (s, 1F).  $^{13}\text{C}$  NMR (101 MHz,  $\text{CDCl}_3$ ):  $\delta$  65.1 (d,  $J$  = 9.1 Hz), 31.3, 24.8, 21.2, 18.6 ppm. HRMS (FI)  $m/z$ :  $[\text{M}+\text{H}]^+$  Calcd for  $\text{C}_7\text{H}_{14}\text{O}_2\text{FS}$  181.0693; Found 181.0697.

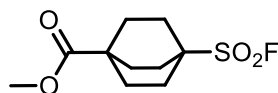

**Methyl-4-(fluorosulfonyl)bicyclo[2.2.2]octane-1-carboxylate (2t):** Obtained as a white solid (m.p. 90-91 °C) in 20% yield (20 mg) by silica gel flash column chromatography eluted with petroleum ether: ethyl acetate = 10:1 v/v.  $^1\text{H}$  NMR (400 MHz,  $\text{CDCl}_3$ ):  $\delta$  3.67 (s, 3H), 2.11 (dd,  $J$  = 9.9, 5.9 Hz, 6H), 1.95 (dd,  $J$  = 10.1, 5.7 Hz, 6H).  $^{19}\text{F}$  NMR (376 MHz,  $\text{CDCl}_3$ ):  $\delta$  33.58 (s, 0.95F), 33.54 (s, 0.05F).  $^{13}\text{C}$  NMR (101 MHz,  $\text{CDCl}_3$ ):  $\delta$  176.2, 60.4 (d,  $J$  = 13.1 Hz), 52.2, 38.1, 27.4, 25.5 ppm. HRMS (ESI)  $m/z$ :  $[\text{M}]^+$  Calcd for  $\text{C}_{10}\text{H}_{15}\text{O}_4\text{FS}$  250.0670; Found 250.0672.

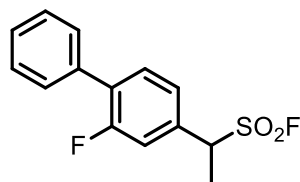

**1-(2-fluoro-[1,1'-biphenyl]-4-yl)ethanesulfonyl fluoride (2u):** Obtained as a white solid (m.p. 100-101 °C) in 84% yield (94.7 mg) by silica gel flash column

chromatography eluted with petroleum ether: ethyl acetate= 10:1 v/v.  $^1\text{H}$  NMR (400 MHz,  $\text{CDCl}_3$ ):  $\delta$  7.61 – 7.55 (m, 2H), 7.55 – 7.45 (m, 3H), 7.45 – 7.39 (m, 1H), 7.36 – 7.27 (m, 2H), 4.69 (q,  $J$  = 7.2 Hz, 1H), 1.97 (d,  $J$  = 7.2 Hz, 3H).  $^{19}\text{F}$  NMR (376 MHz,  $\text{CDCl}_3$ ):  $\delta$  43.10 (s, 0.94F), 43.06 (s, 0.06F), -115.9 (t,  $J$  = 11.3 Hz, 1F).  $^{13}\text{C}$  NMR (101 MHz,  $\text{CDCl}_3$ ):  $\delta$  161.0, 159.8 (d,  $J$  = 250.5 Hz), 134.8 (d,  $J$  = 2.0 Hz), 132.4 (d,  $J$  = 8.1 Hz), 131.5 (d,  $J$  = 4.0 Hz), 129.1 (d,  $J$  = 2.0 Hz), 128.7, 128.4, 125.2 (d,  $J$  = 3.0 Hz), 116.9 (d,  $J$  = 25.3 Hz), 62.5 (d,  $J$  = 16.2 Hz), 16.0 ppm. HRMS (EI)  $m/z$ :  $[\text{M}]^+$  Calcd for  $\text{C}_{14}\text{H}_{12}\text{O}_2\text{F}_2\text{S}$  282.0521; Found 282.0519.

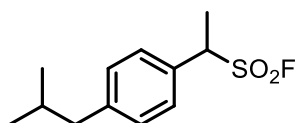

**1-(4-isobutylphenyl)ethanesulfonyl fluoride (2v):** Obtained as a colorless oil in 82% yield (80.1 mg) by silica gel flash column chromatography eluted with petroleum ether: dichloromethane= 5:1 v/v.  $^1\text{H}$  NMR (400 MHz,  $\text{CDCl}_3$ ):  $\delta$  7.36 (d,  $J$  = 8.2 Hz, 2H), 7.21 (d,  $J$  = 8.2 Hz, 2H), 4.63 (q,  $J$  = 7.2 Hz, 1H), 2.50 (d,  $J$  = 7.2 Hz, 2H), 1.93 (d,  $J$  = 7.2 Hz, 3H), 1.91 – 1.80 (m, 1H), 0.92 (d,  $J$  = 6.6 Hz, 6H).  $^{19}\text{F}$  NMR (376 MHz,  $\text{CDCl}_3$ ):  $\delta$  42.21 (s, 0.94F), 42.17 (s, 0.06F).  $^{13}\text{C}$  NMR (101 MHz,  $\text{CDCl}_3$ ):  $\delta$  143.9, 129.9, 128.8, 128.7, 63.0 (d,  $J$  = 14.1 Hz), 45.2, 30.2, 22.4, 16.1 ppm. HRMS (EI)  $m/z$ :  $[\text{M}]^+$  Calcd for  $\text{C}_{12}\text{H}_{17}\text{O}_2\text{FS}$  244.0928; Found 244.0926.

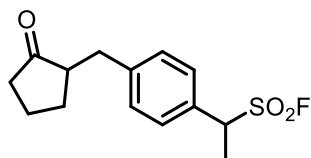

**1-(4-((2-oxocyclopentyl)methyl)phenyl)ethanesulfonyl fluoride (2w):** Obtained in 91%  $^{19}\text{F}$  NMR yield. Crude  $^{19}\text{F}$  NMR (376 MHz):  $\delta$  41.1 ppm. Due to its unstability, it can not be purified by silica gel flash column chromatography from impurities, and its derivatization with 1-naphthol was then performed to unambiguously characterize it (See characterization data of **2ee**).

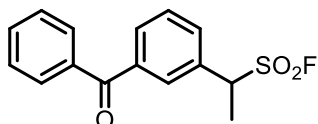

**1-(3-benzoylphenyl)ethanesulfonyl fluoride (2x):** Obtained in 82%  $^{19}\text{F}$  NMR yield. Crude  $^{19}\text{F}$  NMR (376 MHz):  $\delta$  42.3 ppm. Due to its unstability, it can not be purified by silica gel flash column chromatography from impurities, and its derivatization with

1-naphthol was then performed to unambiguously characterize it (See characterization data of **2ff**).

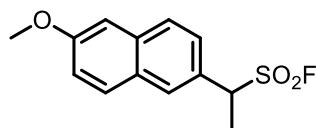

**1-(6-methoxynaphthalen-2-yl)ethanesulfonyl fluoride (2y):** Obtained in 83%  $^{19}\text{F}$  NMR yield. Crude  $^{19}\text{F}$  NMR (376 MHz):  $\delta$  42.0 ppm. Due to its unstability, it can not be purified by silica gel flash column chromatography from impurities, and its derivatization with 1-naphthol was then performed to unambiguously characterize it (See characterization data of **2gg**).

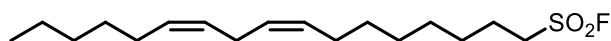

**(8Z,11Z)-heptadeca-8,11-diene-1-sulfonyl fluoride (2z):** Obtained as a colorless oil in 52% yield (65.0 mg) by silica gel flash column chromatography eluted with petroleum ether: dichloromethane = 100:13 v/v.  $^1\text{H}$  NMR (400 MHz,  $\text{CDCl}_3$ ):  $\delta$  5.47 – 5.27 (m, 4H), 3.41 – 3.28 (m, 2H), 2.77 (t,  $J$  = 5.8 Hz, 2H), 2.14 – 2.00 (m, 4H), 1.99 – 1.87 (m, 2H), 1.53 – 1.42 (m, 2H), 1.32 (d,  $J$  = 15.9 Hz, 12H), 0.89 (t,  $J$  = 6.5 Hz, 3H).  $^{19}\text{F}$  NMR (376 MHz,  $\text{CDCl}_3$ ):  $\delta$  53.20 (t,  $J$  = 3.8 Hz, 0.94F), 53.16 (t,  $J$  = 3.8 Hz, 0.06F).  $^{13}\text{C}$  NMR (101 MHz,  $\text{CDCl}_3$ ):  $\delta$  130.4, 129.9, 128.4, 127.9, 51.0 (d,  $J$  = 16.2 Hz), 31.7, 29.6, 29.5, 28.9, 27.9, 28.0, 27.4, 27.2, 25.8, 23.5, 22.7, 14.2 ppm. HRMS (EI)  $m/z$ :  $[\text{M}]^+$  Calcd for  $\text{C}_{17}\text{H}_{31}\text{O}_2\text{FS}$  318.2023; Found 318.2025.

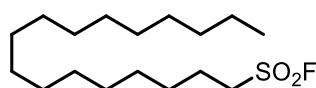

**heptadecane-1-sulfonyl fluoride (2aa):** Obtained as a white solid (m.p. 46-47 °C) in 51% yield (65.7 mg) by silica gel flash column chromatography eluted with petroleum ether: dichloromethane = 10:1 v/v.  $^1\text{H}$  NMR (400 MHz,  $\text{CDCl}_3$ ):  $\delta$  3.40 – 3.31 (m, 2H), 2.00 – 1.89 (m, 2H), 1.47 (p,  $J$  = 7.0 Hz, 2H), 1.25 (s, 26H), 0.88 (t,  $J$  = 6.7 Hz, 3H).  $^{19}\text{F}$  NMR (376 MHz,  $\text{CDCl}_3$ ):  $\delta$  53.15 (t,  $J$  = 3.8 Hz, 0.94F), 53.11 (t,  $J$  = 3.8 Hz, 0.06F).  $^{13}\text{C}$  NMR (101 MHz,  $\text{CDCl}_3$ ):  $\delta$  51.0 (d,  $J$  = 16.2 Hz), 32.1, 29.9, 29.8, 29.8, 29.8, 29.8, 29.7, 29.6, 29.5, 29.3, 29.0, 28.0, 28.0, 23.5, 22.8, 14.3 ppm. HRMS (EI)  $m/z$ :  $[\text{M}]^+$  Calcd for  $\text{C}_{17}\text{H}_{35}\text{O}_2\text{FS}$  322.2336; Found 322.2342. The analytical data are consistent with literature values.<sup>[4]</sup>



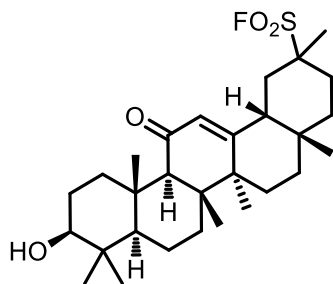

**(4aS,6aS,6bR,8aR,10S,12aS,12bR,14bR)-10-hydroxy-2,4a,6a,6b,9,9,12a-heptamethyl-13-oxo-1,2,3,4,4a,5,6,6a,6b,7,8,8a,9,10,11,12,12a,12b,13,14b-icosahydricene-2-sulfonyl fluoride (2bb):** Obtained as a white solid (m.p. 247–248 °C) in 32% yield (65.0 mg) by silica gel flash column chromatography eluted with petroleum ether: ethyl acetate = 5: 2 v/v. <sup>1</sup>H NMR (400 MHz, CDCl<sub>3</sub>): δ 5.61 (s, 1H), 3.22 (dd, *J* = 10.3, 5.6 Hz, 1H), 2.73 (d, *J* = 13.5 Hz, 1H), 2.50 (t, *J* = 13.4 Hz, 1H), 2.32 (s, 1H), 2.26 – 1.99 (m, 3H), 1.86 – 1.73 (m, 2H), 1.60 (q, *J* = 15.5, 14.2 Hz, 10H), 1.39 (d, *J* = 14.2 Hz, 5H), 1.22 (d, *J* = 12.7 Hz, 2H), 1.11 (s, 8H), 0.99 (s, 3H), 0.91 (s, 3H), 0.79 (s, 3H), 0.69 (d, *J* = 11.4 Hz, 1H). <sup>19</sup>F NMR (376 MHz, CDCl<sub>3</sub>): δ 29.1 (s, 1F). <sup>13</sup>C NMR (101 MHz, CDCl<sub>3</sub>): δ 199.8, 166.2, 129.4, 78.7, 65.1 (d, *J* = 10.1 Hz), 62.0, 54.9, 46.0, 45.6, 43.3, 39.2, 39.2, 37.2, 35.4, 34.8, 32.8, 32.2, 28.2, 28.1, 27.3, 26.3, 26.2 (2C), 23.6, 18.8, 17.6, 17.4, 16.4, 15.7 ppm. HRMS (ESI) *m/z*: [M+H]<sup>+</sup> Calcd for C<sub>29</sub>H<sub>46</sub>O<sub>4</sub>FS 509.3095; Found 509.3089.

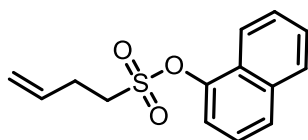

**naphthalen-1-yl but-3-ene-1-sulfonate (2cc):** Obtained as a colorless oil in 47% yield (49.2 mg) by silica gel flash column chromatography eluted with petroleum ether: ethyl acetate = 20:1 v/v. <sup>1</sup>H NMR (400 MHz, CDCl<sub>3</sub>): δ 8.15 (d, *J* = 8.1 Hz, 1H), 7.89 (d, *J* = 7.7 Hz, 1H), 7.81 (d, *J* = 7.7 Hz, 1H), 7.64 – 7.54 (m, 2H), 7.54 – 7.44 (m, 2H), 5.94 – 5.77 (m, 1H), 5.24 – 5.09 (m, 2H), 3.51 – 3.39 (m, 2H), 2.80 (q, *J* = 6.7 Hz, 2H). <sup>13</sup>C NMR (101 MHz, CDCl<sub>3</sub>): δ 145.2, 135.0, 133.4, 128.1, 127.4, 127.3, 127.3, 127.1, 125.5, 121.7, 118.4, 118.0, 50.6, 27.9 ppm. HRMS (EI) *m/z*: [M]<sup>+</sup> Calcd for C<sub>14</sub>H<sub>14</sub>O<sub>3</sub>S 262.0658; Found 262.0662.

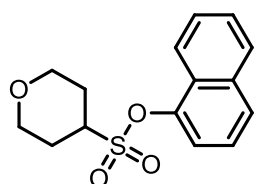

**naphthalen-1-yl tetrahydro-2H-pyran-4-sulfonate (2dd):** Obtained as a colorless oil in 50% yield (58.6 mg) by silica gel flash column chromatography eluted with petroleum ether: ethyl acetate = 4:1 v/v.  $^1\text{H}$  NMR (400 MHz,  $\text{CDCl}_3$ ):  $\delta$  8.13 (d,  $J$  = 7.7 Hz, 1H), 7.88 (d,  $J$  = 7.6 Hz, 1H), 7.80 (d,  $J$  = 6.7 Hz, 1H), 7.64 – 7.51 (m, 2H), 7.51 – 7.40 (m, 2H), 4.25 – 4.09 (m, 2H), 3.69 – 3.58 (m, 1H), 3.54 – 3.40 (m, 2H), 2.37 – 2.15 (m, 4H).  $^{13}\text{C}$  NMR (101 MHz,  $\text{CDCl}_3$ ):  $\delta$  144.9, 135.0, 128.1, 127.5, 127.3, 127.2, 127.1, 125.4, 121.7, 118.4, 66.5 (2C), 58.2, 26.9 (2C) ppm. HRMS (EI)  $m/z$ :  $[\text{M}]^+$  Calcd for  $\text{C}_{15}\text{H}_{16}\text{O}_4\text{S}$  292.0764; Found 292.0768.

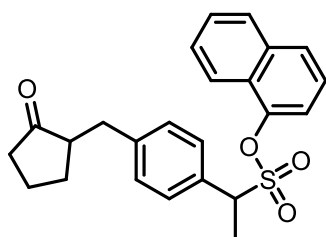

**naphthalen-1-yl 1-(4-((2-oxocyclopentyl)methyl)phenyl)ethanesulfonate (2ee):** Obtained as a yellow oil in 34% yield (56.0 mg) by silica gel flash column chromatography eluted with petroleum ether: ethyl acetate = 20:7 v/v.  $^1\text{H}$  NMR (400 MHz,  $\text{CDCl}_3$ ):  $\delta$  7.82 (d,  $J$  = 8.4 Hz, 2H), 7.72 (d,  $J$  = 8.2 Hz, 1H), 7.54 – 7.41 (m, 4H), 7.35 (t,  $J$  = 7.9 Hz, 1H), 7.23 (d,  $J$  = 7.9 Hz, 2H), 7.14 (d,  $J$  = 7.6 Hz, 1H), 4.74 (q,  $J$  = 7.1 Hz, 1H), 3.20 (dd,  $J$  = 13.8, 3.7 Hz, 1H), 2.63 – 2.51 (m, 1H), 2.43 – 2.30 (m, 2H), 2.17 – 2.07 (m, 2H), 2.03 (d,  $J$  = 7.2 Hz, 3H), 2.01 – 1.93 (m, 1H), 1.83 – 1.70 (m, 1H), 1.62 – 1.49 (m, 1H).  $^{13}\text{C}$  NMR (101 MHz,  $\text{CDCl}_3$ ):  $\delta$  219.9, 145.2, 141.6, 134.9, 131.4, 129.6, 129.5, 127.8, 127.5, 127.0, 126.9, 126.8, 125.3, 121.9, 118.0, 62.8, 51.0, 38.2, 35.4, 29.3, 20.6, 16.3 ppm. HRMS (ESI)  $m/z$ :  $[\text{M}+\text{Na}]^+$  Calcd for  $\text{C}_{24}\text{H}_{24}\text{O}_4\text{NaS}$  431.1288; Found 431.1289.

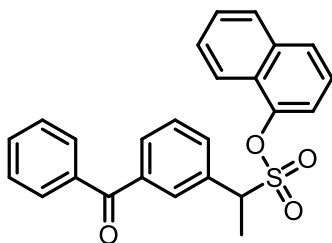

**naphthalen-1-yl 1-(3-benzoylphenyl)ethanesulfonate (2ff):** Obtained as a yellow oil in 40% yield (66.0 mg) by silica gel flash column chromatography eluted with petroleum ether: ethyl acetate = 5:1 v/v.  $^1\text{H}$  NMR (400 MHz,  $\text{CDCl}_3$ ):  $\delta$  7.98 (s, 1H), 7.88 (d,  $J$  = 7.7 Hz, 1H), 7.86 – 7.72 (m, 6H), 7.61 – 7.53 (m, 2H), 7.52 – 7.45 (m, 2H), 7.44 – 7.36 (m, 3H), 7.25 (dd,  $J$  = 8.1, 2.2 Hz, 1H), 4.83 (q,  $J$  = 7.2 Hz, 1H), 2.07 (d,  $J$

= 7.2 Hz, 3H).  $^{13}\text{C}$  NMR (101 MHz,  $\text{CDCl}_3$ ):  $\delta$  195.9, 145.1, 138.3, 137.1, 134.9, 134.0, 133.2, 132.8, 131.1, 130.9, 130.2, 129.1, 128.5, 127.9, 127.4, 127.2, 127.1, 127.0, 125.3, 121.7, 118.0, 62.8, 16.3 ppm. HRMS (ESI)  $m/z$ :  $[\text{M}+\text{H}]^+$  Calcd for  $\text{C}_{25}\text{H}_{21}\text{O}_4\text{S}$  417.1155; Found 417.1154.

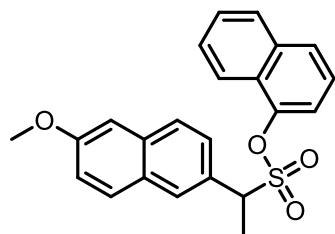

**naphthalen-1-yl-1-(6-methoxynaphthalen-2-yl)ethanesulfonate (2gg):** Obtained as a yellow oil in 43% yield (72.0 mg) by silica gel flash column chromatography eluted with petroleum ether: ethyl acetate = 5:1 v/v.  $^1\text{H}$  NMR (400 MHz,  $\text{CDCl}_3$ ):  $\delta$  7.92 (s, 1H), 7.80 (dd,  $J$  = 8.4, 3.2 Hz, 2H), 7.72 (dd,  $J$  = 11.9, 8.6 Hz, 3H), 7.64 (dd,  $J$  = 8.6, 1.8 Hz, 1H), 7.48 – 7.42 (m, 1H), 7.36 – 7.28 (m, 2H), 7.24 – 7.15 (m, 3H), 4.90 (q,  $J$  = 7.2 Hz, 1H), 3.95 (s, 3H), 2.14 (d,  $J$  = 7.2 Hz, 3H).  $^{13}\text{C}$  NMR (101 MHz,  $\text{CDCl}_3$ ):  $\delta$  158.6, 145.3, 135.0, 134.9, 129.8, 129.1, 128.8, 128.6, 127.8, 127.6, 127.5, 127.0, 127.0, 126.9, 126.8, 125.3, 121.9, 119.6, 118.0, 105.8, 63.3, 55.5, 16.5 ppm. HRMS (ESI)  $m/z$ :  $[\text{M}+\text{Na}^+]$  Calcd for  $\text{C}_{23}\text{H}_{20}\text{O}_4\text{NaS}$  415.0975; Found 415.0976.

## VII. Scale-up and derivatization reactions of the aliphatic sulfonyl fluoride **2v**

### 1. Gram-scale synthesis of 1-(4-isobutylphenyl)ethanesulfonyl fluoride (**2v**)

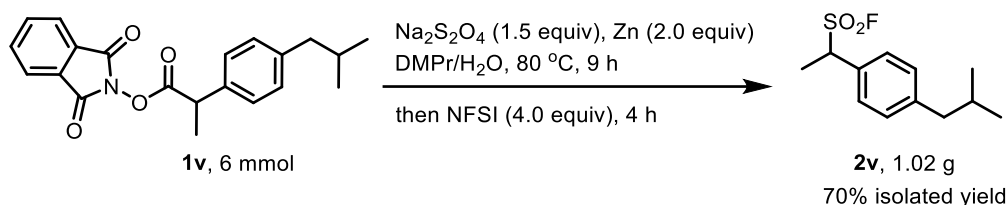

To a 100 mL round-bottomed flask equipped with a magnetic stirring bar were added 1,3-dioxoisindolin-2-yl 2-(4-isobutylphenyl)propanoate **1v** (6.0 mmol, 1.0 equiv.),  $\text{Na}_2\text{S}_2\text{O}_4$  (9 mmol, 1.0 equiv.), zinc (12 mmol, 2.0 equiv.). The tube was then evacuated and backfilled with Ar (3 times) and DMPr (N,N-Dimethylpropionamide) :  $\text{H}_2\text{O}$  (60 : 12 mL) was added via syringe under Ar atmosphere. The mixture was sealed and stirred smoothly at 80 °C for 9 h. Then NFSI (18 mmol, 3 equiv.) was added and the reaction mixture was stirred smoothly at room temperature for 4 h. The reaction mixture was filtered through a pad of celite, diluted with DCM (20 mL) and  $\text{H}_2\text{O}$  (50 mL). The resulting mixture was extracted with DCM (2 × 20 mL). The organic layers were combined, washed with brine (50 mL), dried over  $\text{Na}_2\text{SO}_4$ , filtered and concentrated. The crude product was purified by silica gel chromatography to give the desired product (1.02 g, 70%).

### 2. Derivatization of 1-(4-isobutylphenyl)ethanesulfonyl fluoride **2v** with various O- or N-nucleophiles

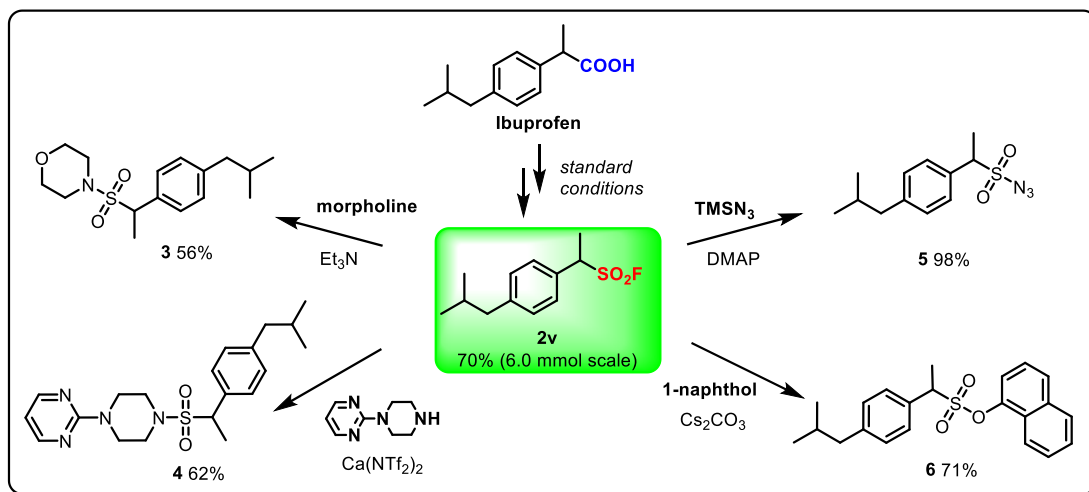

**(a) The procedure for the preparation of sulfonamides 3<sup>[7]</sup>**

A 10 mL sealed tube equipped with a magnetic stirring bar was charged with **2v** (0.4 mmol, 1.0 equiv.), morpholine (0.8 mmol, 2.0 equiv.), Et<sub>3</sub>N (0.8 mmol, 2.0 equiv.) and anhydrous MeCN (4 mL). The reaction mixture was stirred vigorously at 80 °C under Ar atmosphere for 24 h. The resulting mixture was filtered through a pad of silica gel and concentrated under reduced pressure. The residue was subjected to flash column chromatography to afford the desired product.

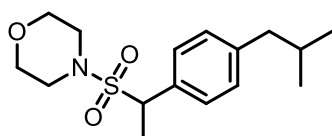

**((1-(4-isobutylphenyl)ethyl)sulfonyl)morpholine (3):** Obtained as a colorless oil in 56% yield (69.3 mg) by silica gel flash column chromatography eluted with petroleum ether : ethyl acetate = 5:1 v/v. <sup>1</sup>H NMR (400 MHz, CDCl<sub>3</sub>): δ 7.32 (d, *J* = 7.8 Hz, 2H), 7.13 (d, *J* = 7.7 Hz, 2H), 4.19 (q, *J* = 7.0 Hz, 1H), 3.58 – 3.39 (m, 4H), 3.10 – 2.95 (m, 2H), 2.80 (s, 2H), 2.46 (d, *J* = 7.1 Hz, 2H), 1.84 (dd, *J* = 13.3, 6.5 Hz, 1H), 1.74 (d, *J* = 7.1 Hz, 3H), 0.86 (d, *J* = 6.5 Hz, 6H). <sup>13</sup>C NMR (101 MHz, CDCl<sub>3</sub>): δ 142.8, 132.1, 129.5, 128.9, 66.8, 62.9, 46.3, 45.0, 30.2, 22.3, 22.3, 16.2 ppm. HRMS (FI) *m/z*: [M]<sup>+</sup> Calcd for C<sub>16</sub>H<sub>25</sub>O<sub>3</sub>NS 311.1550; Found 311.1546.

**(b) The procedure for the preparation of sulfonamides 4<sup>[8]</sup>**

A 10 mL sealed tube equipped with a magnetic stirring bar was charged with **2v** (0.2 mmol, 1.0 equiv.), 2-(piperazin-1-yl)pyrimidine (0.22 mmol, 1.1 equiv.),  $\text{Ca}(\text{NTf}_2)_2$  (0.2 mmol, 1.0 equiv.), DABCO (0.3 mmol, 1.5 equiv.) and anhydrous THF (2 mL). The reaction mixture was stirred vigorously at 25 °C under Ar atmosphere for 24 h. The mixture was filtered through a pad of silica gel and concentrated under reduced pressure. The residue was subjected to flash column chromatography to afford the desired product.

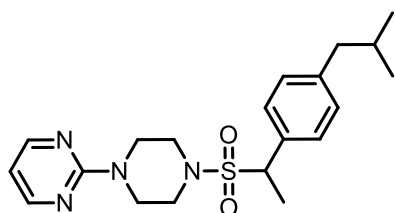

**(4-((1-(4-isobutylphenyl)ethyl)sulfonyl)piperazin-1-yl)pyrimidine (4):** Obtained as a white solid (m.p. 126-127 °C) in 62% yield (48.2 mg) by silica gel flash column chromatography eluted with petroleum ether : ethyl acetate = 5:1 v/v.  $^1\text{H}$  NMR (400 MHz,  $\text{CDCl}_3$ ):  $\delta$  8.27 (d,  $J$  = 4.6 Hz, 2H), 7.31 (d,  $J$  = 7.9 Hz, 2H), 7.11 (d,  $J$  = 7.8 Hz, 2H), 6.50 (t,  $J$  = 4.6 Hz, 1H), 4.21 (q,  $J$  = 7.0 Hz, 1H), 3.69 (q,  $J$  = 15.5, 14.6 Hz, 4H), 3.11 (dd,  $J$  = 11.9, 4.1 Hz, 2H), 2.92 (s, 2H), 2.45 (d,  $J$  = 7.1 Hz, 2H), 1.83 (dd,  $J$  = 13.4, 6.8 Hz, 1H), 1.77 (d,  $J$  = 7.1 Hz, 3H), 0.86 (d,  $J$  = 6.5 Hz, 6H).  $^{13}\text{C}$  NMR (101 MHz,  $\text{CDCl}_3$ ):  $\delta$  161.5, 157.8, 142.8, 132.2, 129.6, 128.9, 110.5, 63.2, 46.1, 45.2, 44.1, 30.3, 22.4, 16.3 ppm. HRMS (FI)  $m/z$ :  $[\text{M}]^+$  Calcd for  $\text{C}_{20}\text{H}_{28}\text{O}_2\text{N}_4\text{S}$  388.1927; Found 388.1925.

**(c) The procedure for the preparation of 4-methoxybenzenesulfonyl azide **5**<sup>[7]</sup>**

To a stirred solution of **2v** (0.4 mmol, 1.0 equiv.) in MeCN (4 mL) was added DMAP (0.6 mmol, 1.5 equiv.) followed by  $\text{TMSN}_3$  (0.3 mmol, 0.75 equiv.). The resulting solution was stirred at room temperature for 70 min, then a further portion of  $\text{TMSN}_3$  (0.3 mmol, 0.75 equiv.) was added. The reaction mixture was stirred at 50 °C for 8 h. After cooled to room temperature, the reaction mixture was filtered through a

pad of celite, eluted with DCM, and concentrated under reduced pressure. The residue was subjected to flash column chromatography to afford the desired product.

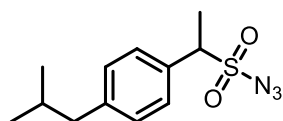

**(isobutylphenyl)ethanesulfonyl azide (5):** Obtained as a colorless oil in 98% yield (104.7 mg) by silica gel flash column chromatography eluted with petroleum ether : ethyl acetate = 4:1 v/v.  $^1\text{H}$  NMR (400 MHz,  $\text{CDCl}_3$ ):  $\delta$  7.41 (d,  $J$  = 7.9 Hz, 2H), 7.22 (d,  $J$  = 7.9 Hz, 2H), 4.54 (q,  $J$  = 7.2 Hz, 1H), 2.51 (d,  $J$  = 7.2 Hz, 2H), 1.89 (d,  $J$  = 7.2 Hz, 3H), 1.85 (d,  $J$  = 6.7 Hz, 1H), 0.90 (d,  $J$  = 6.6 Hz, 6H).  $^{13}\text{C}$  NMR (101 MHz,  $\text{CDCl}_3$ ):  $\delta$  144.0, 129.9, 129.6, 129.3, 67.5, 45.5, 30.2, 22.3, 22.3, 15.0 ppm. HRMS (FI)  $m/z$ :  $[\text{M}]^+$  Calcd for  $\text{C}_{12}\text{H}_{17}\text{O}_2\text{N}_3\text{S}$  267.1036; Found 267.1038.

**(d) The procedure for the preparation of sulfonic ester 6<sup>[9]</sup>**

A 10 mL sealed tube equipped with a magnetic stirring bar was charged with **2v** (0.4 mmol, 1.0 equiv.), 1-naphthol (0.8 mmol, 2.0 equiv.),  $\text{Cs}_2\text{CO}_3$  (0.8 mmol, 2.0 equiv.) and anhydrous MeCN (3 mL). The reaction mixture was stirred vigorously at 60 °C under argon atmosphere for 12 h. The mixture was filtered through a short plug of silica gel and concentrated under reduced pressure. The residue was subjected to flash column chromatography to afford the desired product.

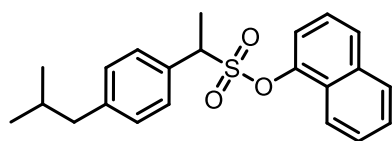

**naphthalen-1-yl 1-(4-isobutylphenyl)ethanesulfonate (6):** Obtained as a white solid (m.p. 71-73 °C) in 71% yield (105.0 mg) by silica gel flash column chromatography eluted with petroleum ether : ethyl acetate = 5:1 v/v.  $^1\text{H}$  NMR (400 MHz,  $\text{CDCl}_3$ ):  $\delta$  7.81 (dd,  $J$  = 7.9, 3.4 Hz, 2H), 7.72 (d,  $J$  = 8.2 Hz, 1H), 7.53 – 7.41 (m, 4H), 7.33 (t,  $J$  = 8.0 Hz, 1H), 7.23 (d,  $J$  = 8.0 Hz, 2H), 7.06 (d,  $J$  = 7.6 Hz, 1H), 4.75 (q,  $J$  = 7.2 Hz, 1H), 2.54 (d,  $J$  = 7.2 Hz, 2H), 2.05 (d,  $J$  = 7.2 Hz, 3H), 2.01 – 1.84 (m, 1H), 0.96 (d,  $J$  = 6.6 Hz, 6H).  $^{13}\text{C}$  NMR (101 MHz,  $\text{CDCl}_3$ ):  $\delta$  145.3, 143.2, 134.9, 130.8, 129.7, 129.3,

127.8, 127.6, 127.0, 126.9, 126.8, 125.3, 122.0, 118.1, 63.0, 45.2, 30.3, 22.5, 16.2 ppm.  
 HRMS (FI) m/z: [M]<sup>+</sup> Calcd for C<sub>22</sub>H<sub>24</sub>O<sub>3</sub>S 368.1441; Found 368.1445.

## VIII. Preliminary mechanistic studies

### 1. Radical inhibition experiments

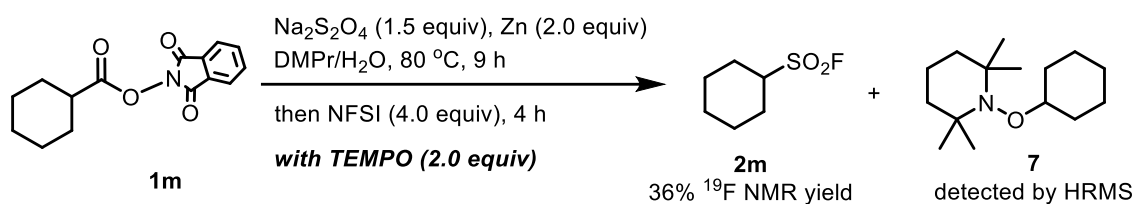

To an oven-dried sealed tube (10 mL) equipped with a magnetic stirring bar were added 1,3-dioxoisindolin-2-yl-cyclohexanecarboxylate **1m** (0.4 mmol, 1.0 equiv.), Na<sub>2</sub>S<sub>2</sub>O<sub>4</sub> (0.6 mmol, 1.5 equiv.), Zinc (0.8 mmol, 2 equiv.), TEMPO (125 mg, 0.8 mmol). The tube was then evacuated and backfilled with Ar (3 times) and DMPPr (N, N-Dimethylpropionamide) : H<sub>2</sub>O (4 : 0.8 mL) was added via syringe under Ar atmosphere. The mixture was sealed and stirred smoothly at 80 °C for 9 h. Then NFSI (1.2 mmol, 3.0 equiv.) was added and the reaction mixture was stirred smoothly at room temperature for 4 h. The crude reaction mixture was then analyzed by <sup>19</sup>F NMR spectroscopy and HRMS.

**Compound 7:** HRMS (FI) m/z: [M]<sup>+</sup> Calcd for C<sub>15</sub>H<sub>29</sub>ON 239.2244; Found 239.2238.

### 2. Radical clock experiments

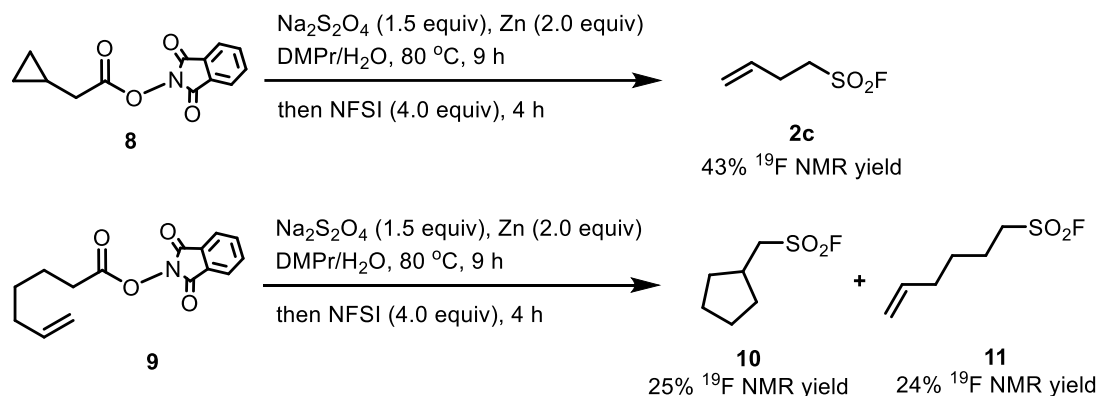



Following the general procedure for reductive decarboxylative fluorosulfonylation of aliphatic carboxylic acids, substrate **8** (0.4 mmol) afforded 43%  $^{19}\text{F}$  NMR yield of **2c**, and substrate **9** gave 25%  $^{19}\text{F}$  NMR yield of **10** and 24%  $^{19}\text{F}$  NMR yield of **11**.

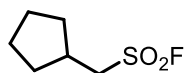

**cyclopentylmethanesulfonyl fluoride (10):** Obtained as a colorless oil in 25% yield (16.6 mg) by silica gel flash column chromatography eluted with petroleum ether: dichloromethane = 100:14 v/v.  $^1\text{H}$  NMR (400 MHz,  $\text{CDCl}_3$ ):  $\delta$  3.48 – 3.30 (m, 2H), 2.52 – 2.35 (m, 1H), 2.11 – 1.93 (m, 2H), 1.80 – 1.59 (m, 4H), 1.41 – 1.27 (m, 2H).  $^{19}\text{F}$  NMR (376 MHz,  $\text{CDCl}_3$ ):  $\delta$  56.04 (s, 0.96F), 56.00 (s, 0.06F).  $^{13}\text{C}$  NMR (101 MHz,  $\text{CDCl}_3$ ):  $\delta$  56.4 (d,  $J = 13.1$  Hz), 35.1, 32.4, 24.9 ppm. HRMS (EI)  $m/z$ :  $[\text{M}]^+$  Calcd for  $\text{C}_6\text{H}_{11}\text{O}_2\text{FS}$  166.0458; Found 166.0462.

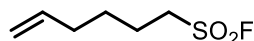

**hex-5-ene-1-sulfonyl fluoride (11):** Obtained as a colorless oil in 23% yield (15.8 mg) by silica gel flash column chromatography eluted with petroleum ether: dichloromethane = 100:16 v/v.  $^1\text{H}$  NMR (400 MHz,  $\text{CDCl}_3$ ):  $\delta$  5.83 – 5.69 (m, 1H), 5.09 – 5.00 (m, 2H), 3.41 – 3.33 (m, 2H), 2.13 (q,  $J = 7.0$  Hz, 2H), 2.01 – 1.92 (m, 2H), 1.64 – 1.57 (m, 2H).  $^{19}\text{F}$  NMR (376 MHz,  $\text{CDCl}_3$ ):  $\delta$  53.30 (t,  $J = 3.8$  Hz, 0.94F), 53.26 (t,  $J = 3.8$  Hz, 0.06F).  $^{13}\text{C}$  NMR (101 MHz,  $\text{CDCl}_3$ ):  $\delta$  137.2, 116.0, 50.9 (d,  $J = 16.2$  Hz), 32.9, 27.1, 22.9 ppm. HRMS (FI)  $m/z$ :  $[\text{M}]^+$  Calcd for  $\text{C}_6\text{H}_{11}\text{O}_2\text{FS}$  166.0458; Found 166.0459.

## IX. Reference

1. T. Qin, J. Cornella, C. Li, L. R. Malins, J. T. Edwards, S. Kawamura, B. D. Maxwell, M. D. Eastgate and P. S. Baran, A General Alkyl-Alkyl Cross-Coupling Enabled by Redox-Active Esters and Alkylzinc Reagents, *Science*, 2016, **352**, 801.
2. Y. Liu, D. Yu, Y. Guo, J.-C. Xiao, Q.-Y. Chen and C. Liu, Arenesulfonyl Fluoride Synthesis via Copper-Catalyzed Fluorosulfonylation of Arenediazonium Salts, *Org. Lett.*, 2020, **22**, 2281.
3. Y. Jiang, N. S. Alharbi, B. Sun and H.-L. Qin, Facile One-pot Synthesis of Sulfonyl Fluorides from Sulfonates or Sulfonic Acids, *RSC Adv.*, 2019, **9**, 13863.
4. T.-X. Xu, T.-P. Cao, M.-C. Yang, R.-T. Xu, X.-L. Nie and S.-H. Liao, Decarboxylative Thiolation of Redox-active Esters to Thioesters by Merging Photoredox and Copper Catalysis, *Org. Lett.*, 2020, **22**, 3692.
5. X. Zhang, W. Y. Fang, R. Lekkala, W. Tang and H. L. Qin, An Easy, General and Practical Method for the Construction of Alkyl Sulfonyl Fluorides, *Adv. Synth. Catal.*, 2020, **362**, 3358.
6. G. Laudadio, A. d. A. Bartolomeu, L. M. H. M. Verwijlen, Y. Cao, K. T. de Oliveira and T. Noel, Sulfonyl Fluoride Synthesis through Electrochemical Oxidative Coupling of Thiols and Potassium Fluoride, *J. Am. Chem. Soc.*, 2019, **141**, 11832.
7. R. Xu, T. Xu, M. Yang, T. Cao and S. Liao, A Rapid Access to Aliphatic Sulfonyl Fluorides, *Nat. Commun.*, 2019, **10**, 3752.
8. S. Mahapatra, C. P. Woroch, T. W. Butler, S. N. Carneiro, S. C. Kwan, S. R. Khasnavis, J. Gu, J. K. Dutra, B. C. Vetelino, J. Bellenger, C. W. am Ende and N. D. Ball, SuFEx Activation with  $\text{Ca}(\text{NTf}_2)_2$ : A Unified Strategy to Access Sulfamides, Sulfamates and Sulfonamides from S(VI) Fluorides, *Org. Lett.*, 2020, **22**, 4389.
9. A. L. Tribby, I. Rodríguez, S. Shariffudin and N. D. Ball, Pd-Catalyzed Conversion of Aryl Iodides to Sulfonyl Fluorides Using  $\text{SO}_2$  Surrogate DABSO and Selectfluor, *J. Org. Chem.*, 2017, **82**, 2294.
10. A. T. Davies, J. M. Curto, S. W. Bagleyb and M. C. Willis, One-pot palladium-catalyzed synthesis of sulfonyl fluorides from aryl bromides, *Chem. Sci.*, 2017, **8**, 1233.

## X. Copies of $^1\text{H}$ , $^{19}\text{F}$ , and $^{13}\text{C}$ NMR spectra

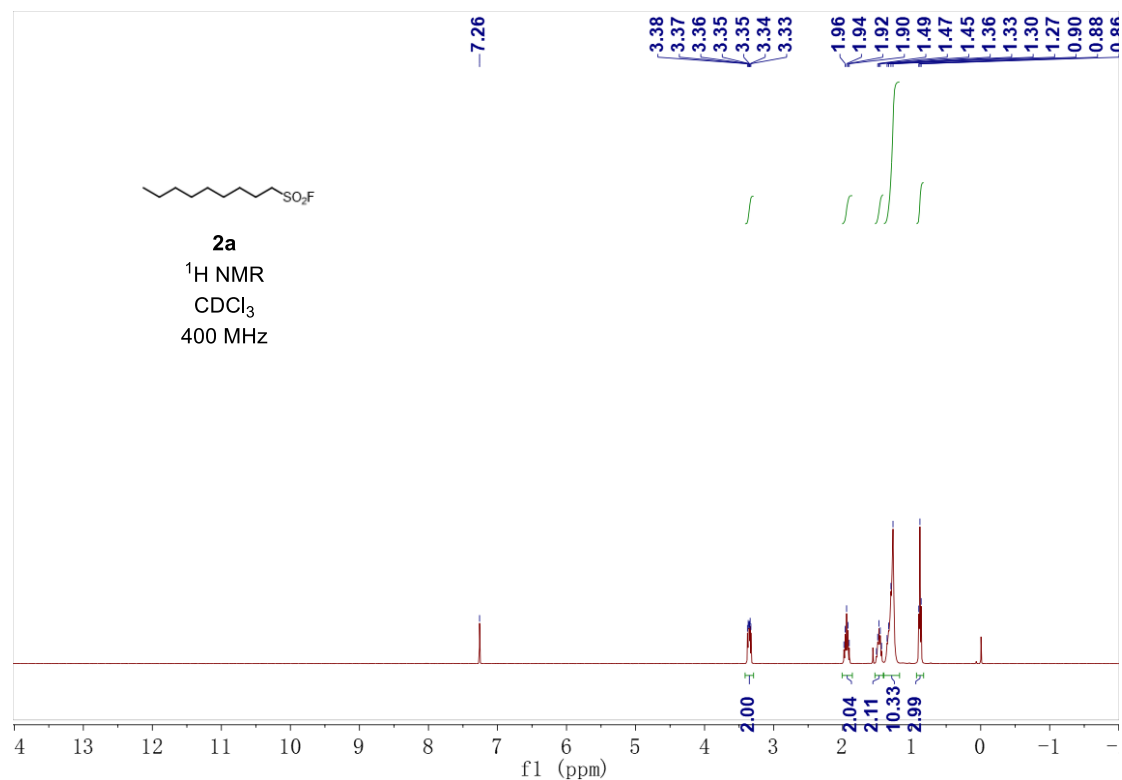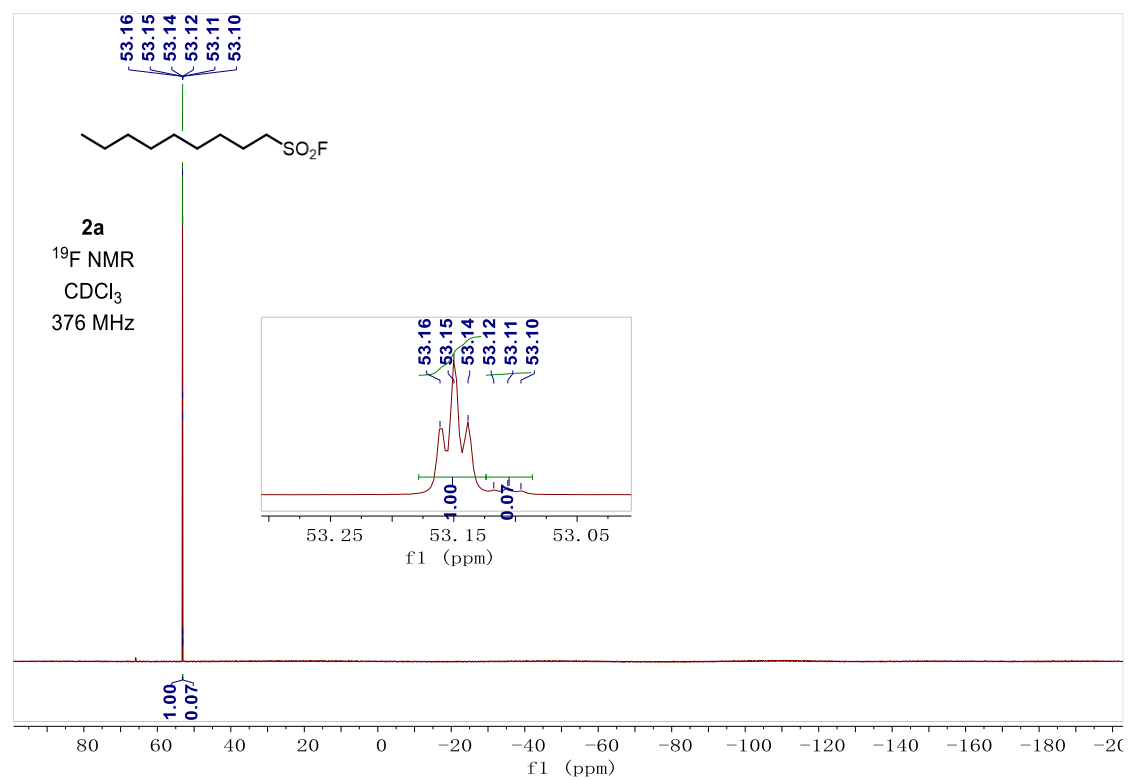

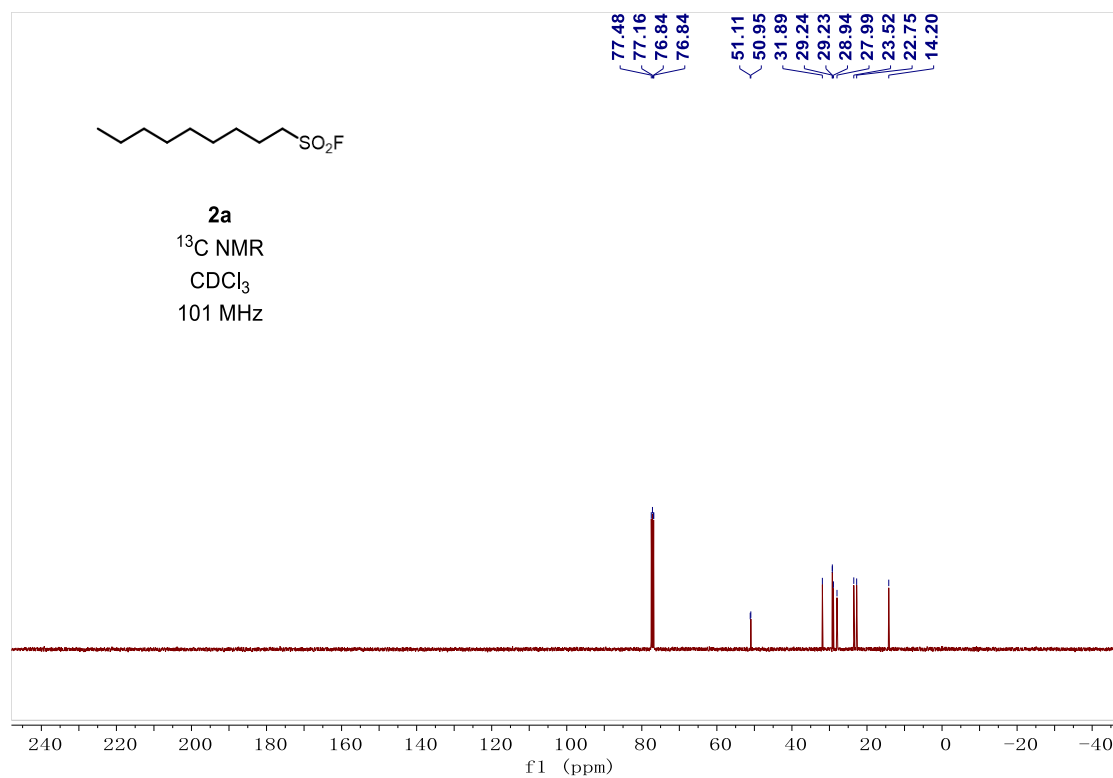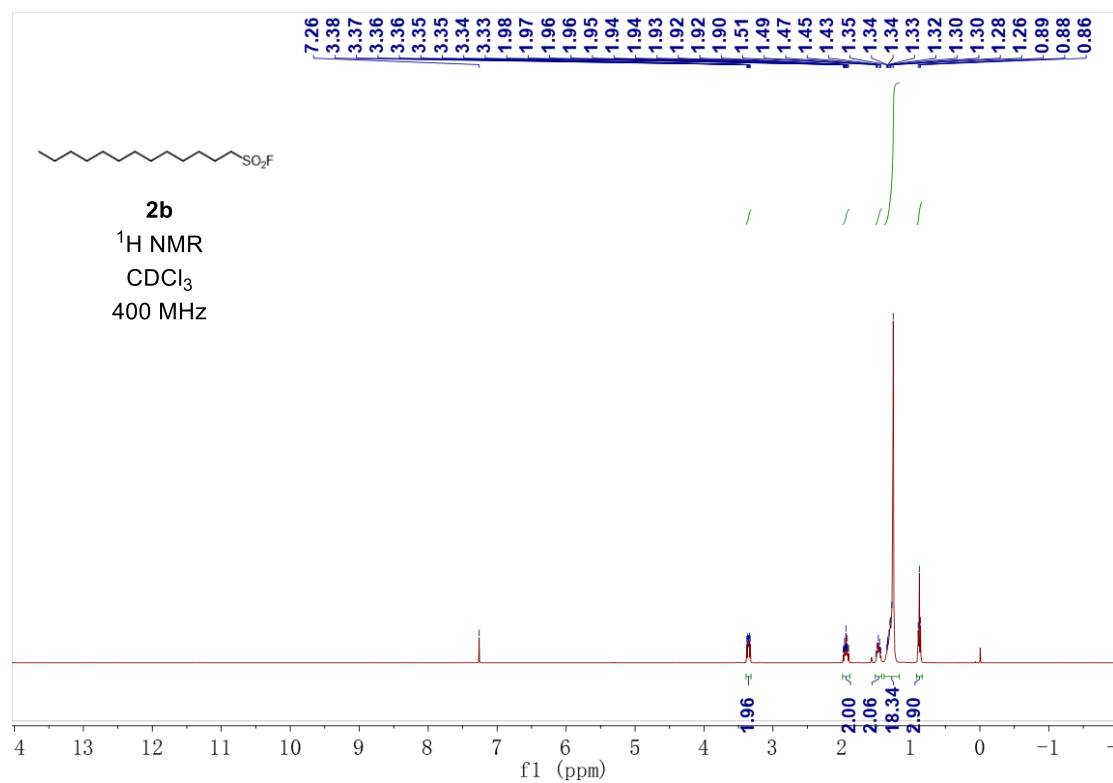

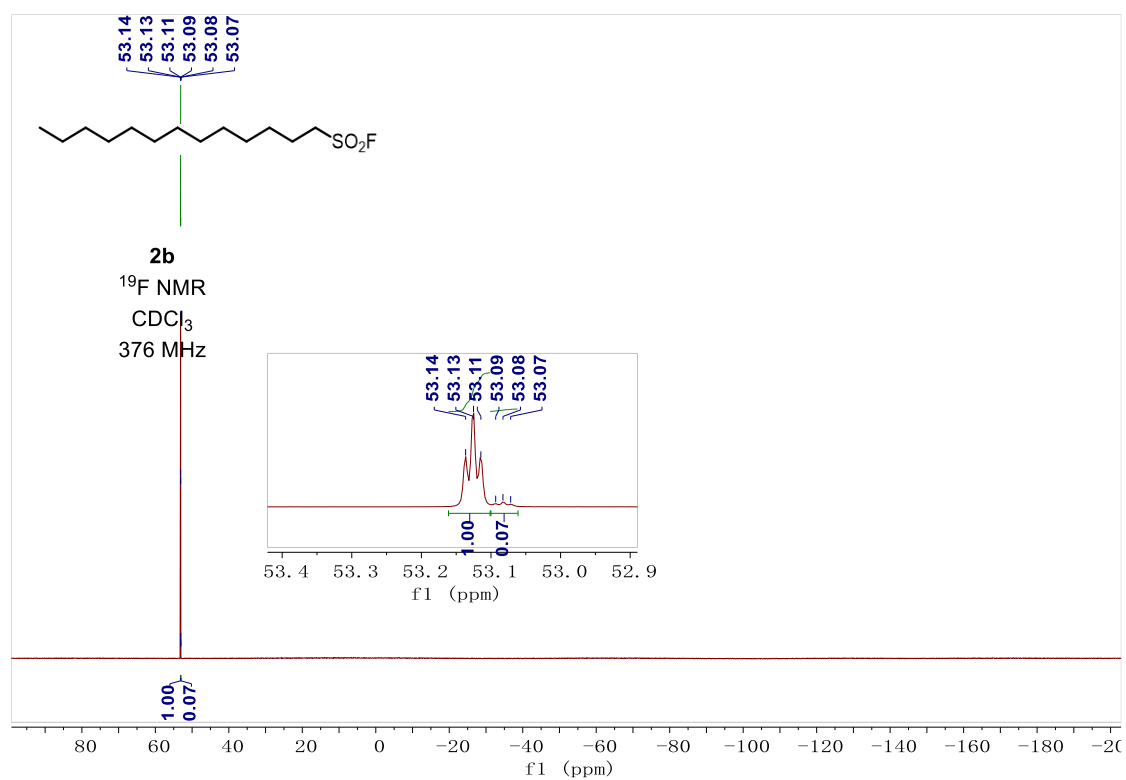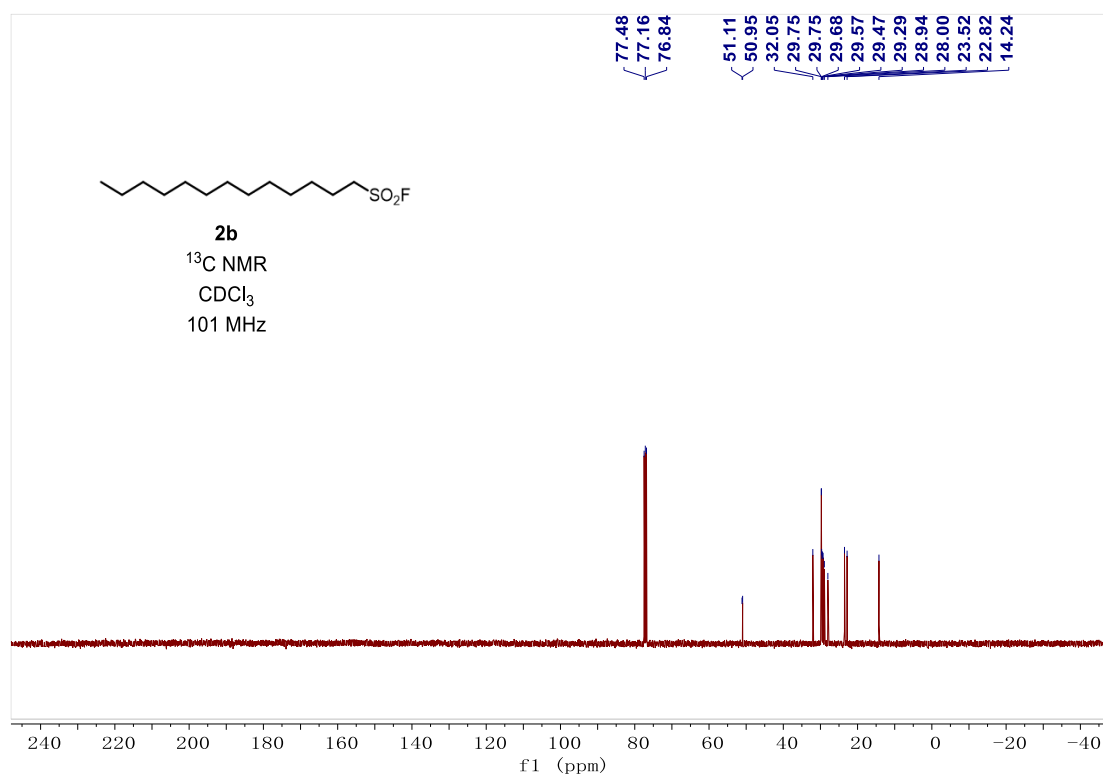

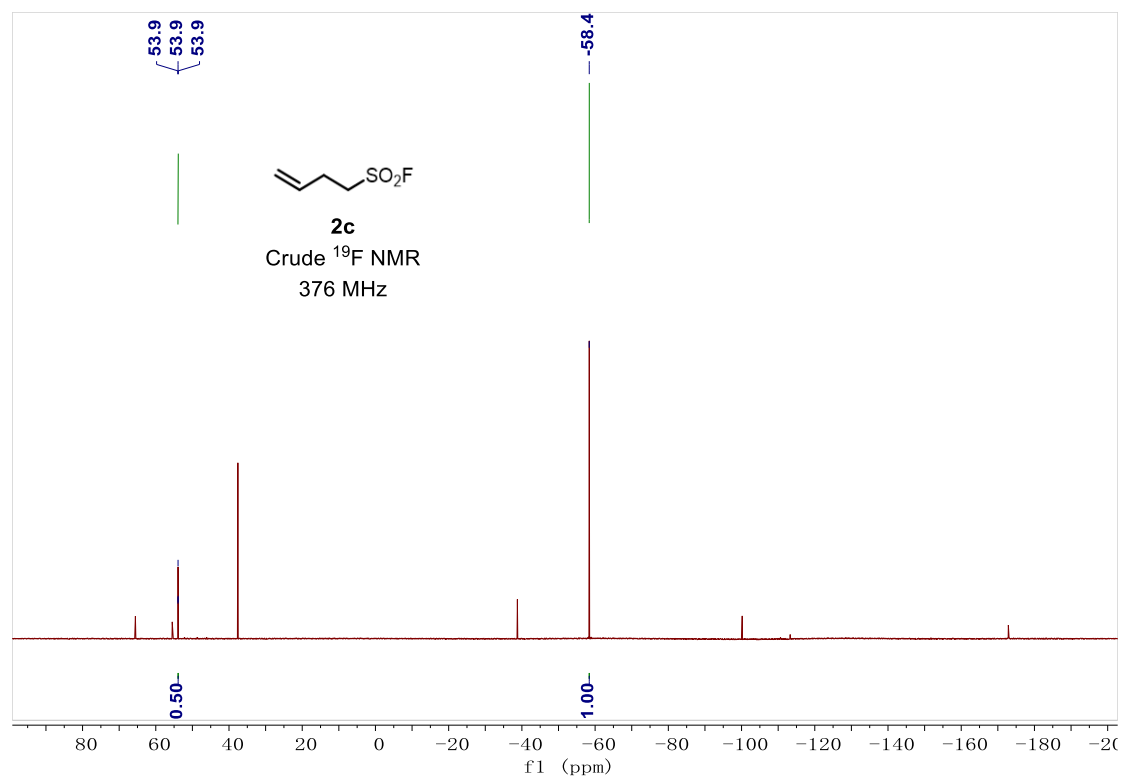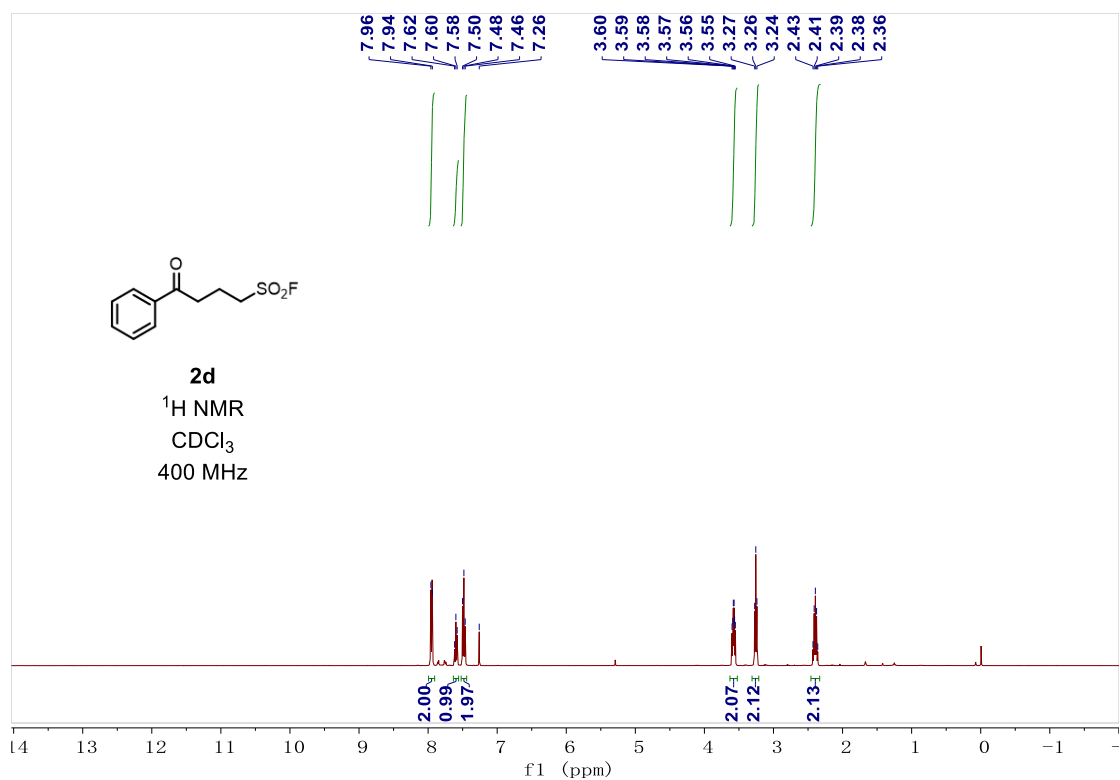

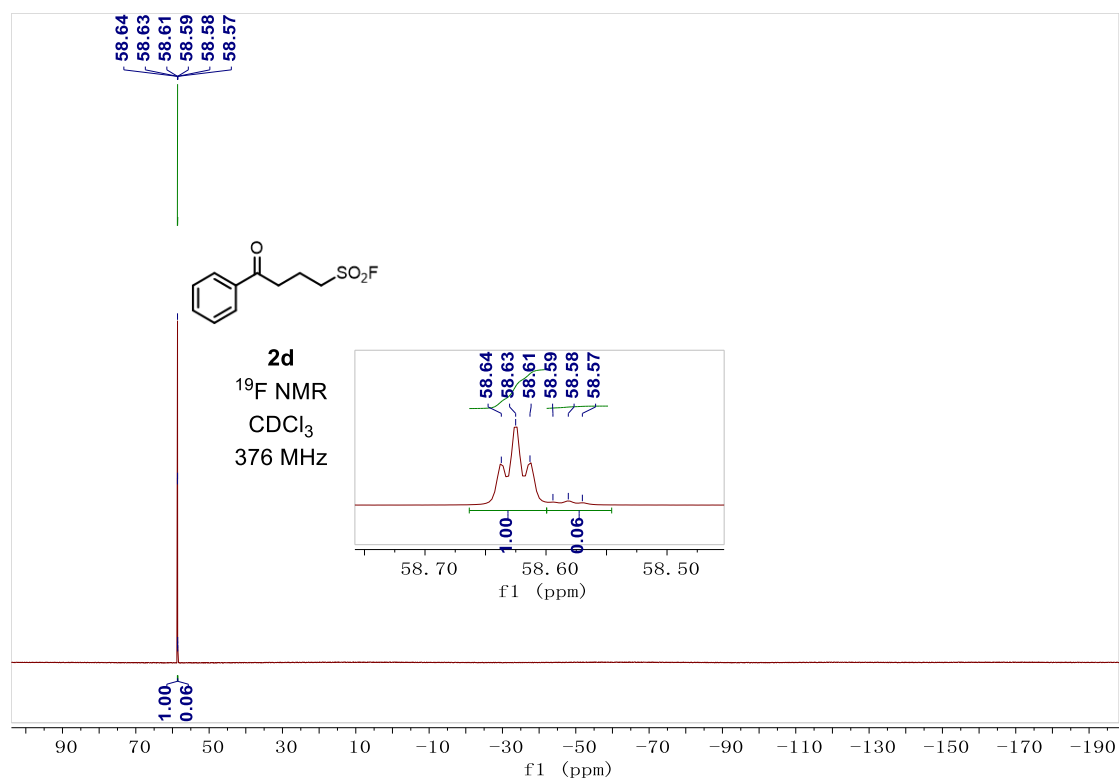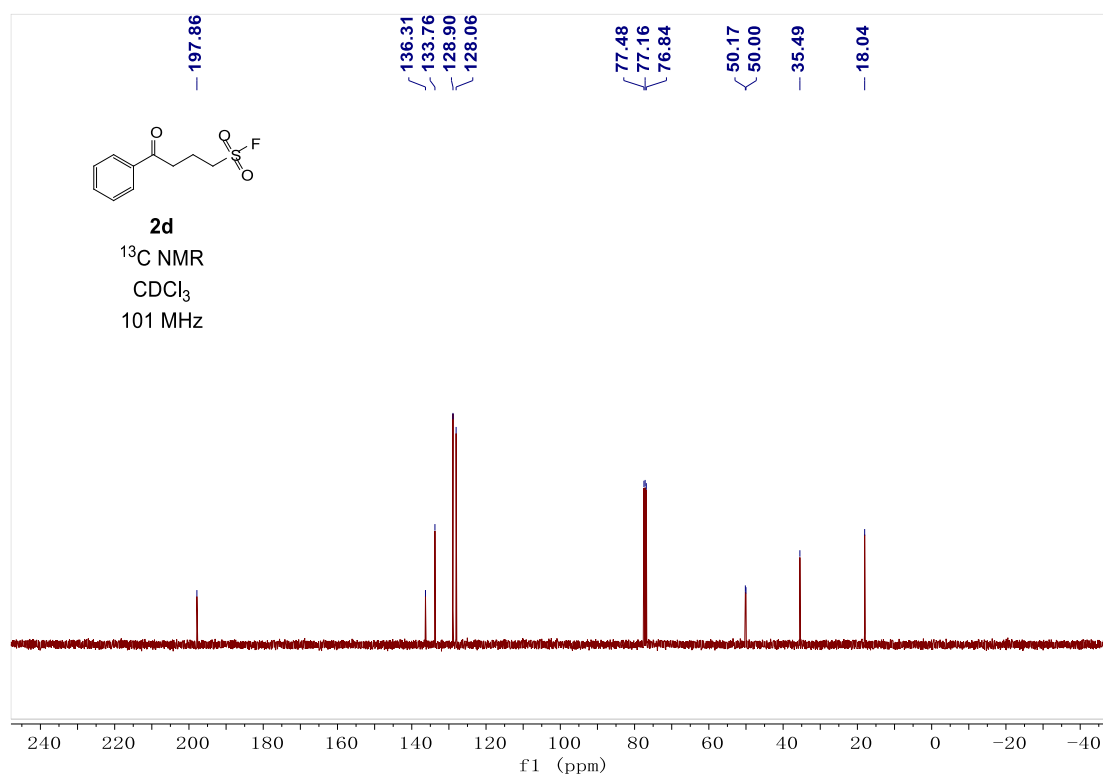

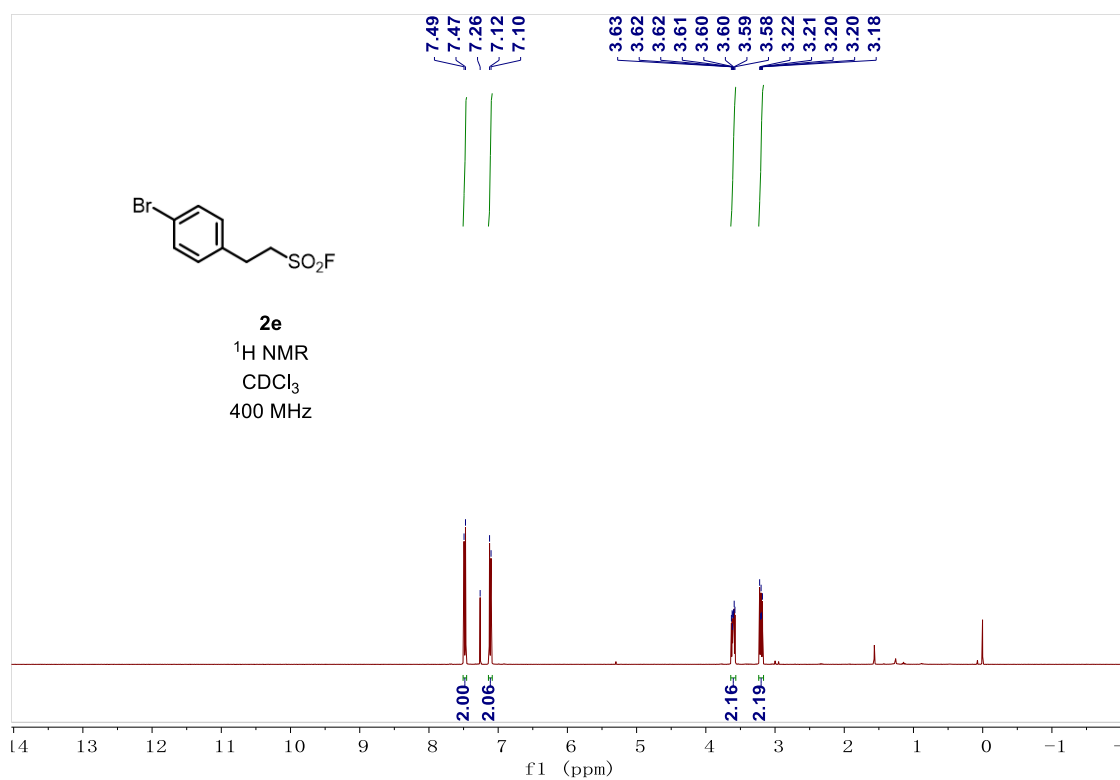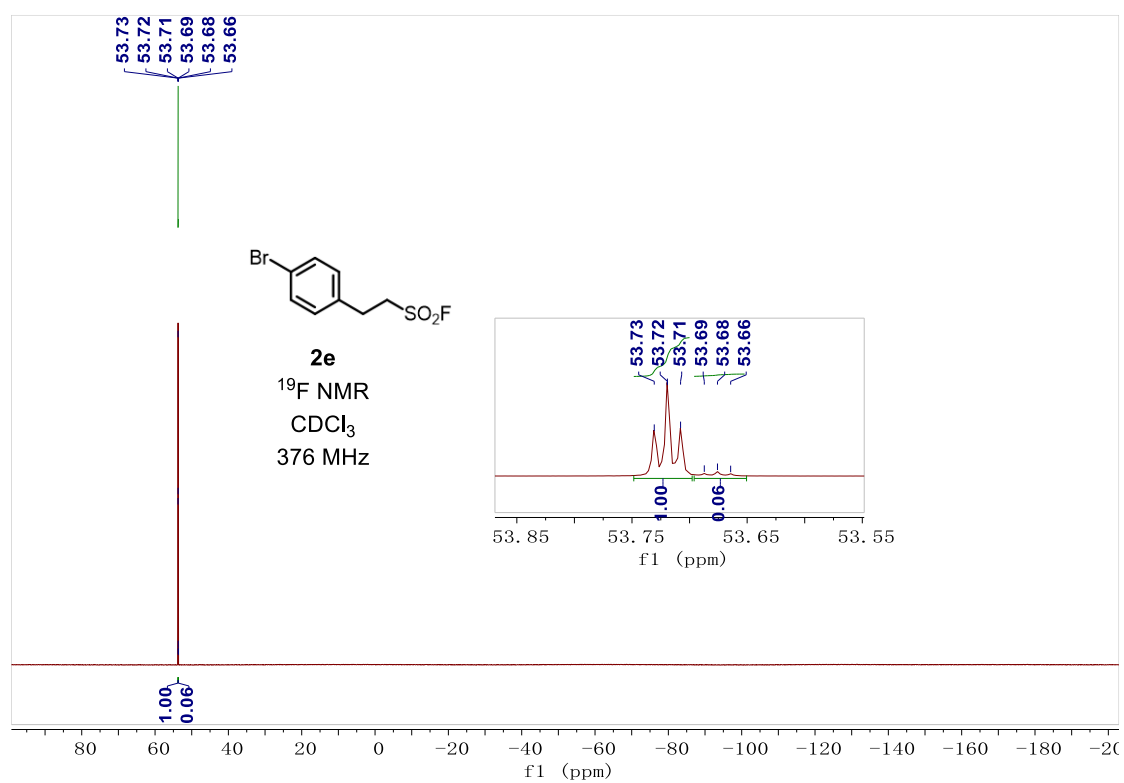



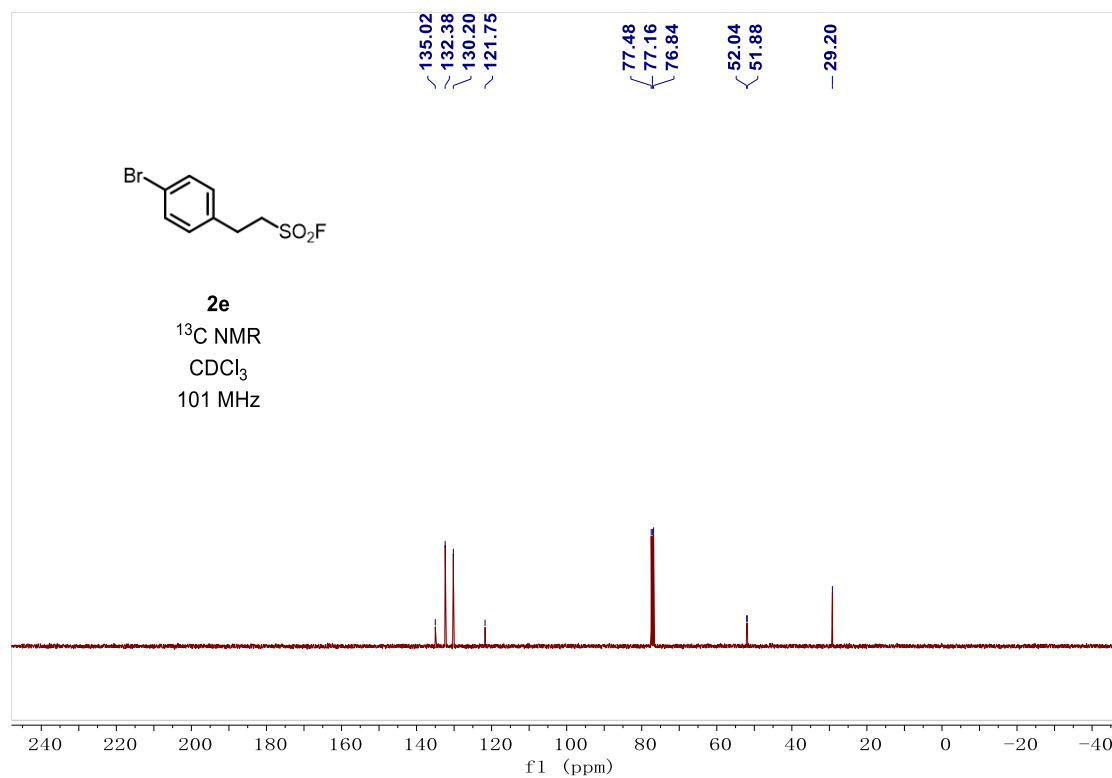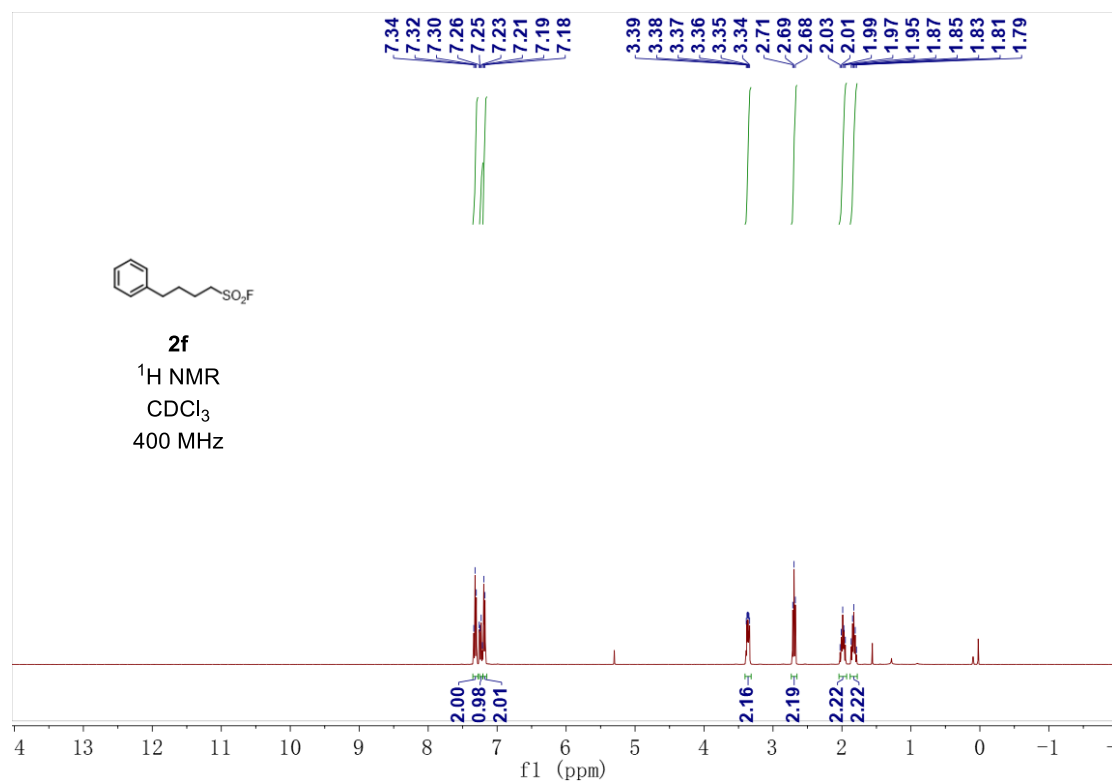

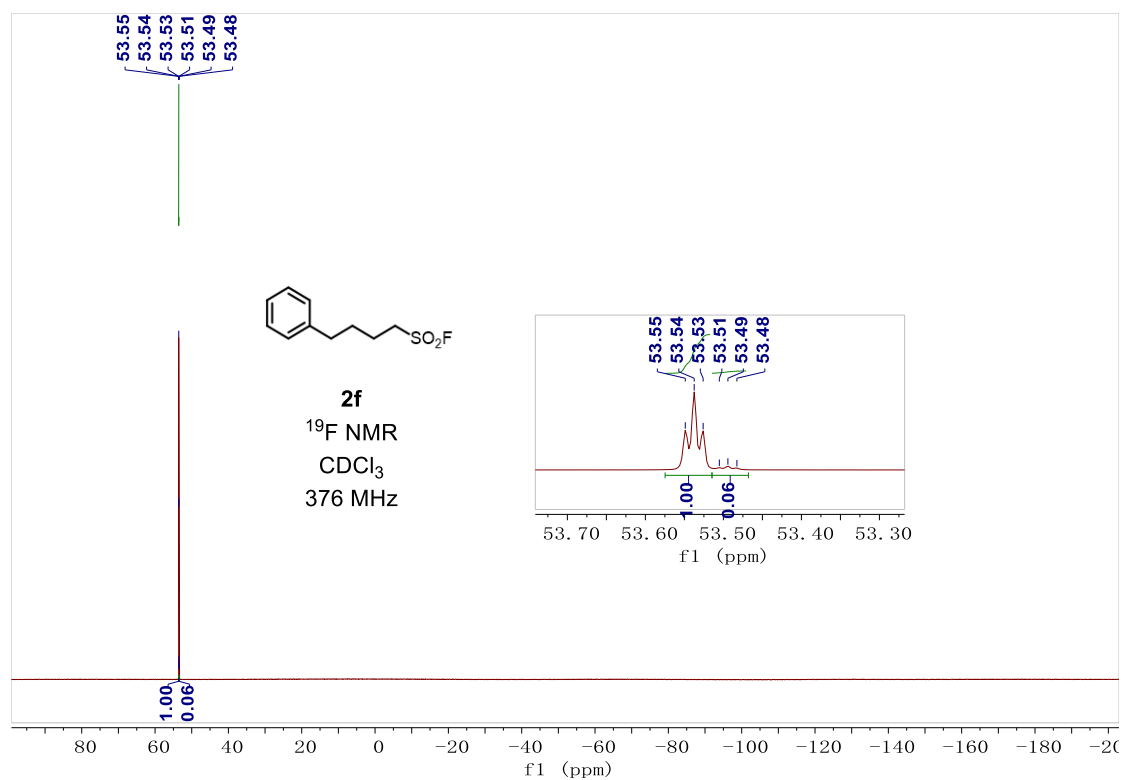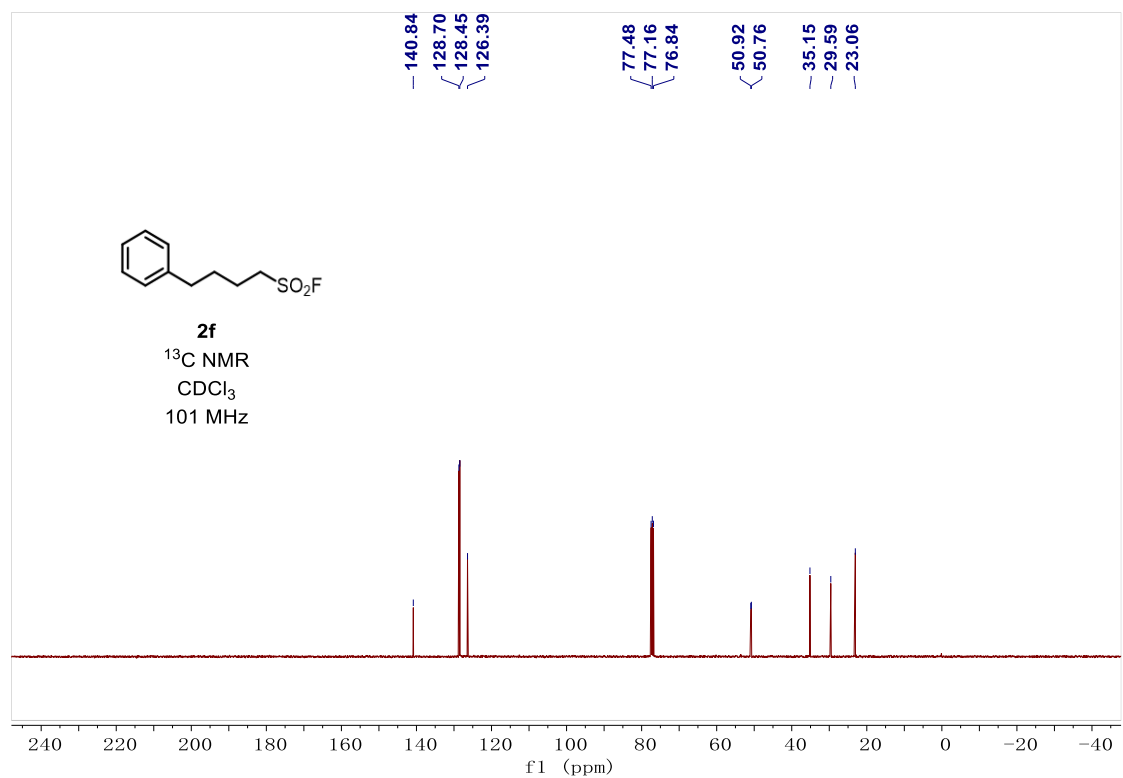

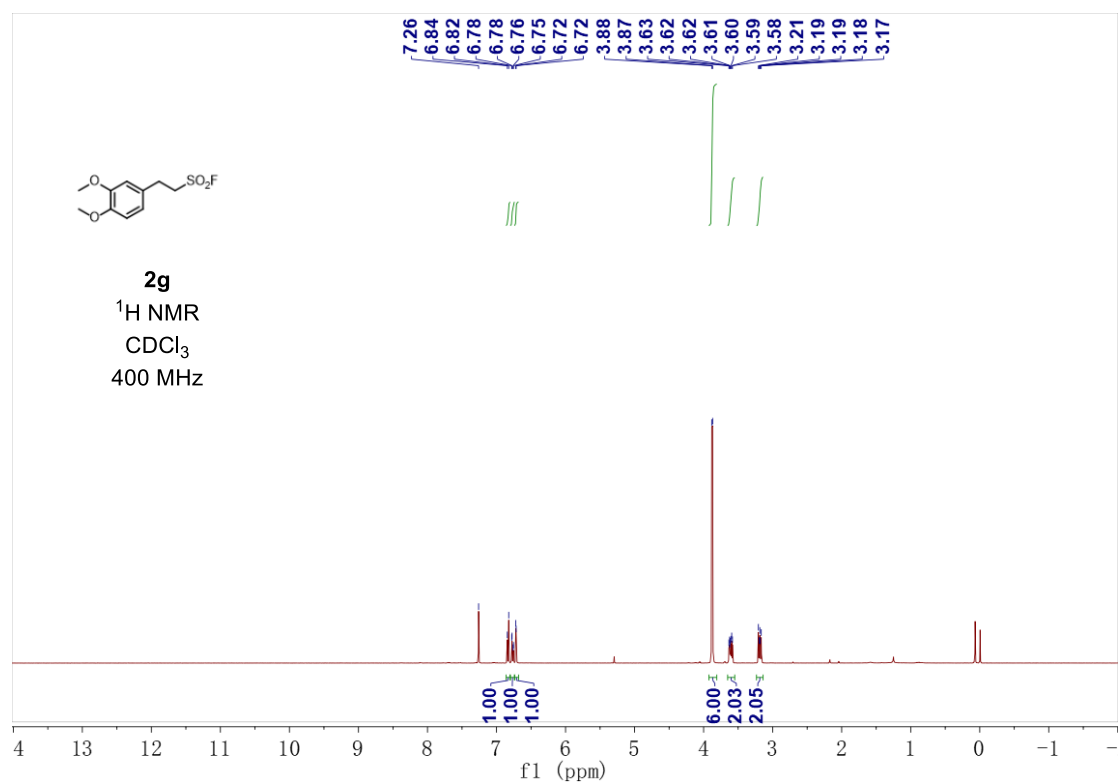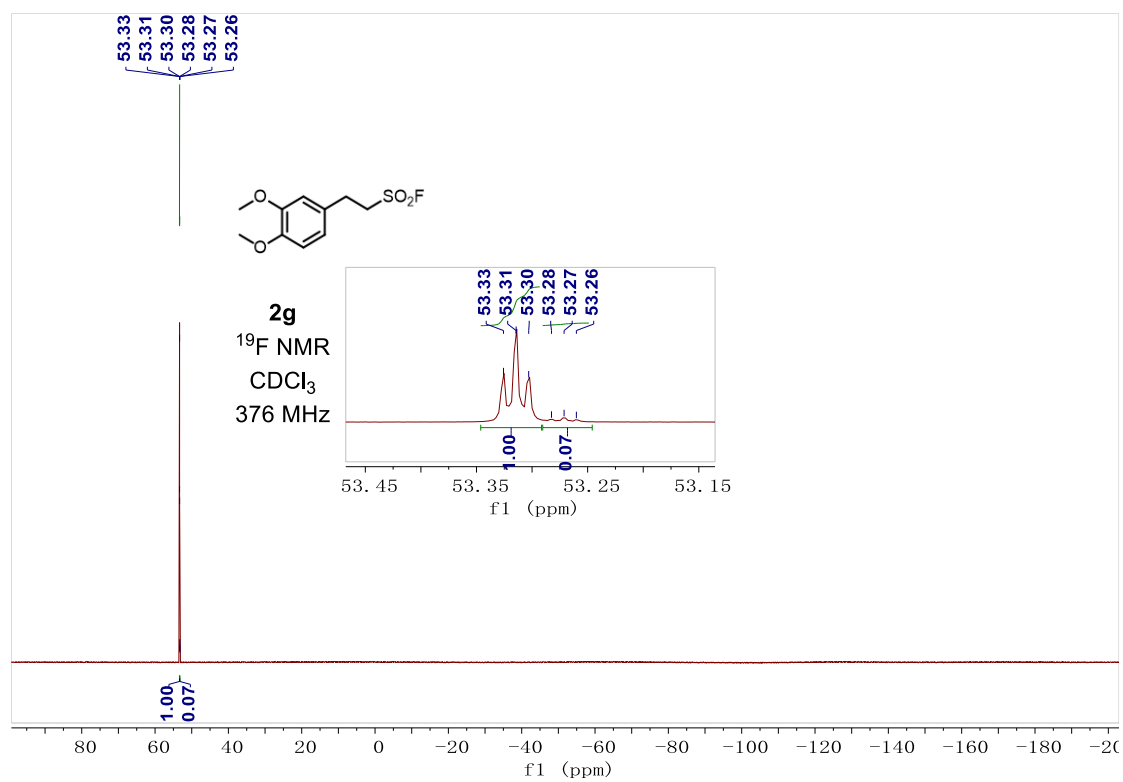

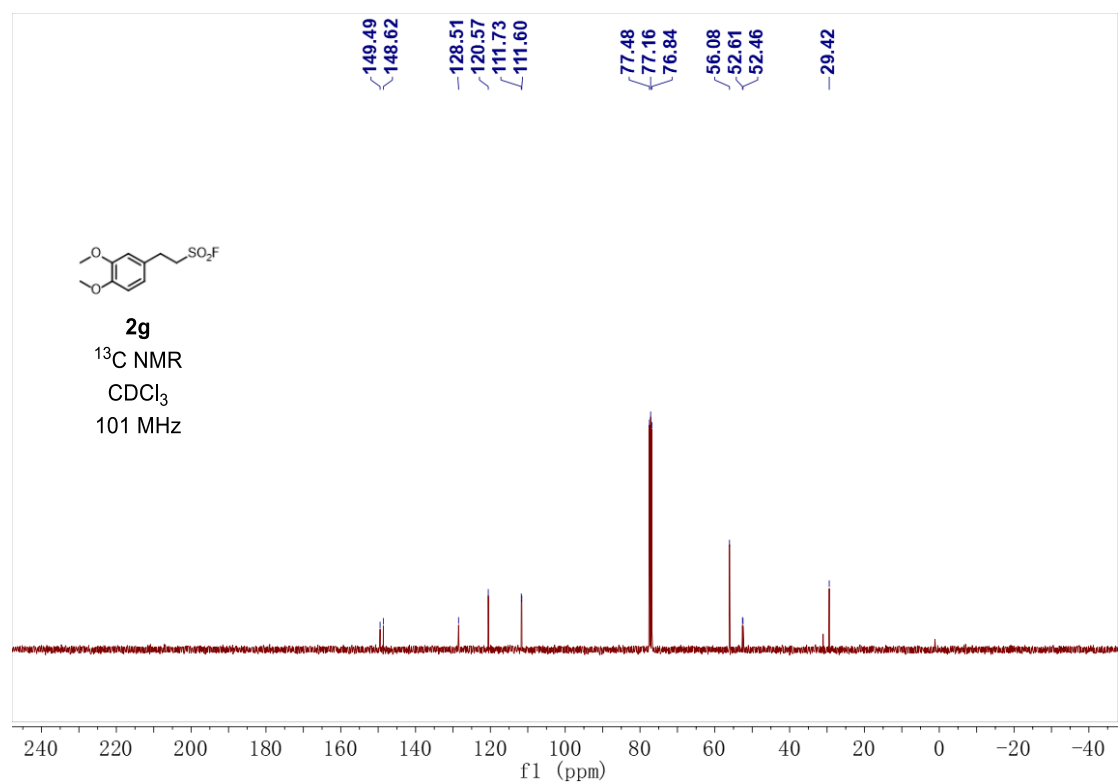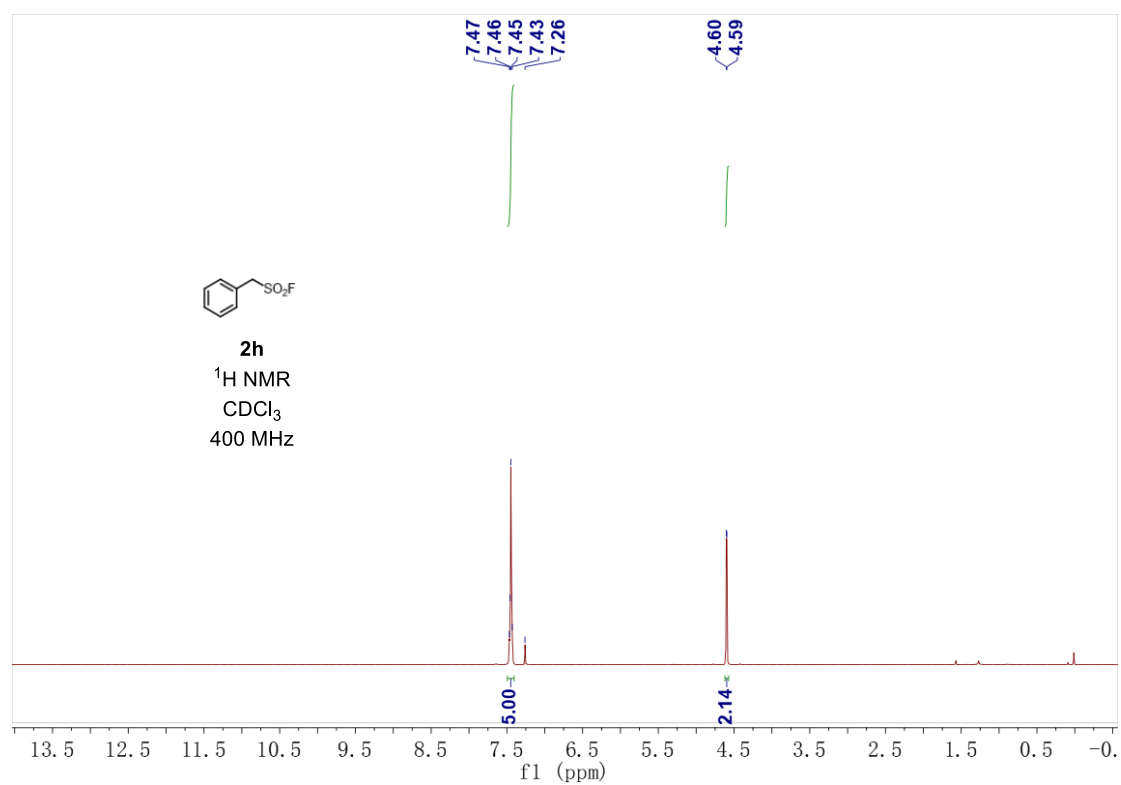

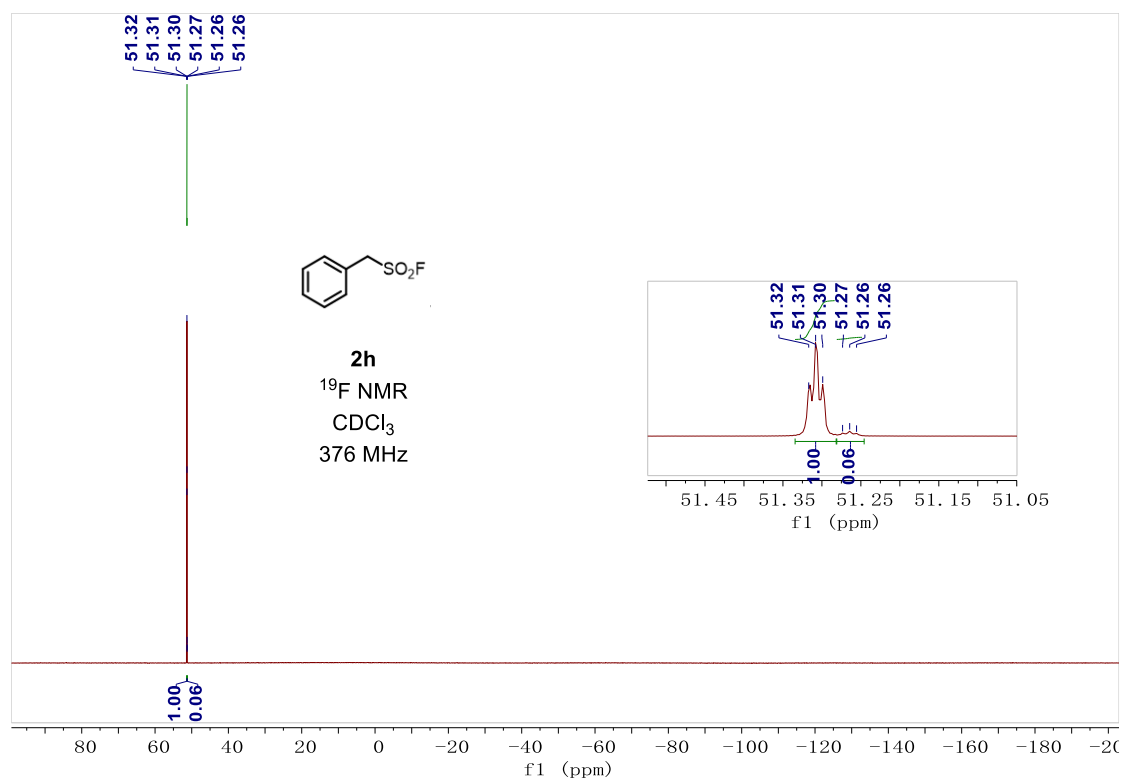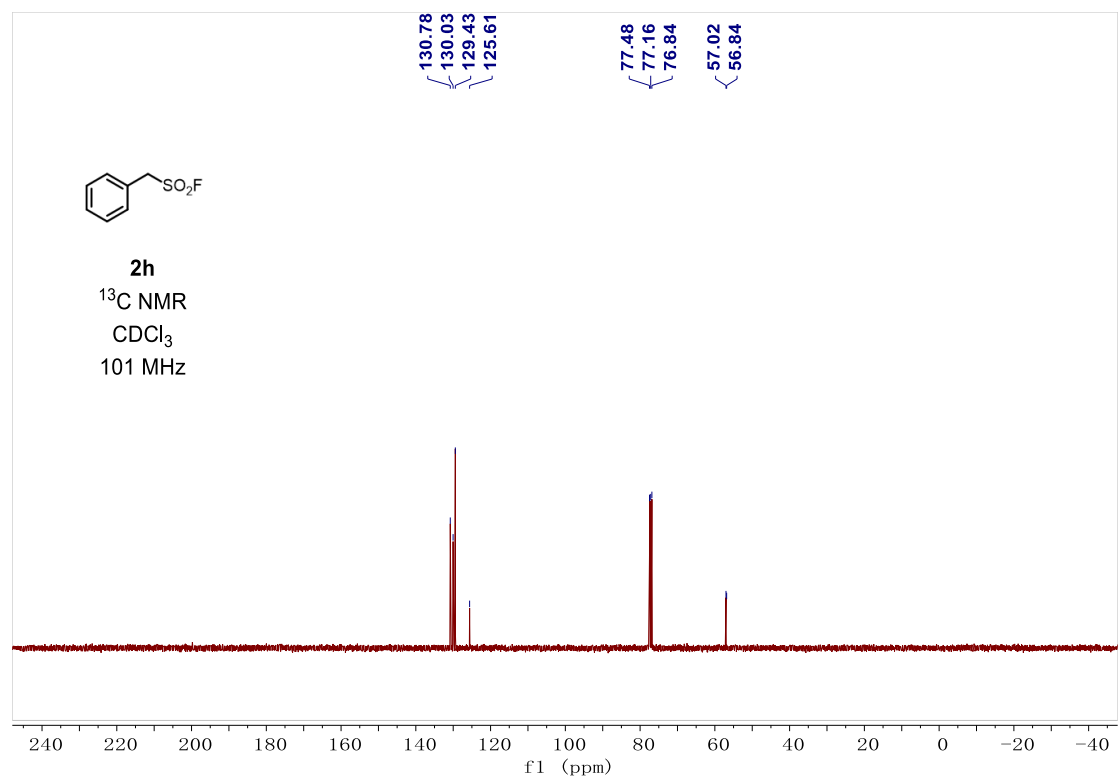

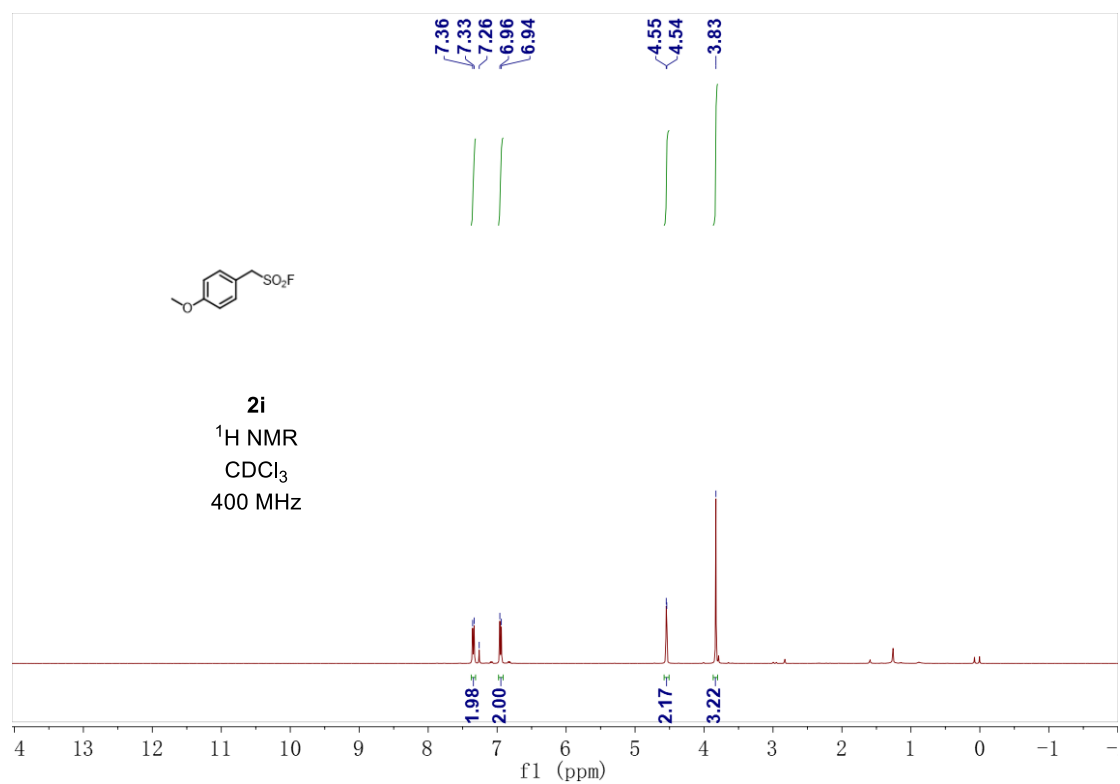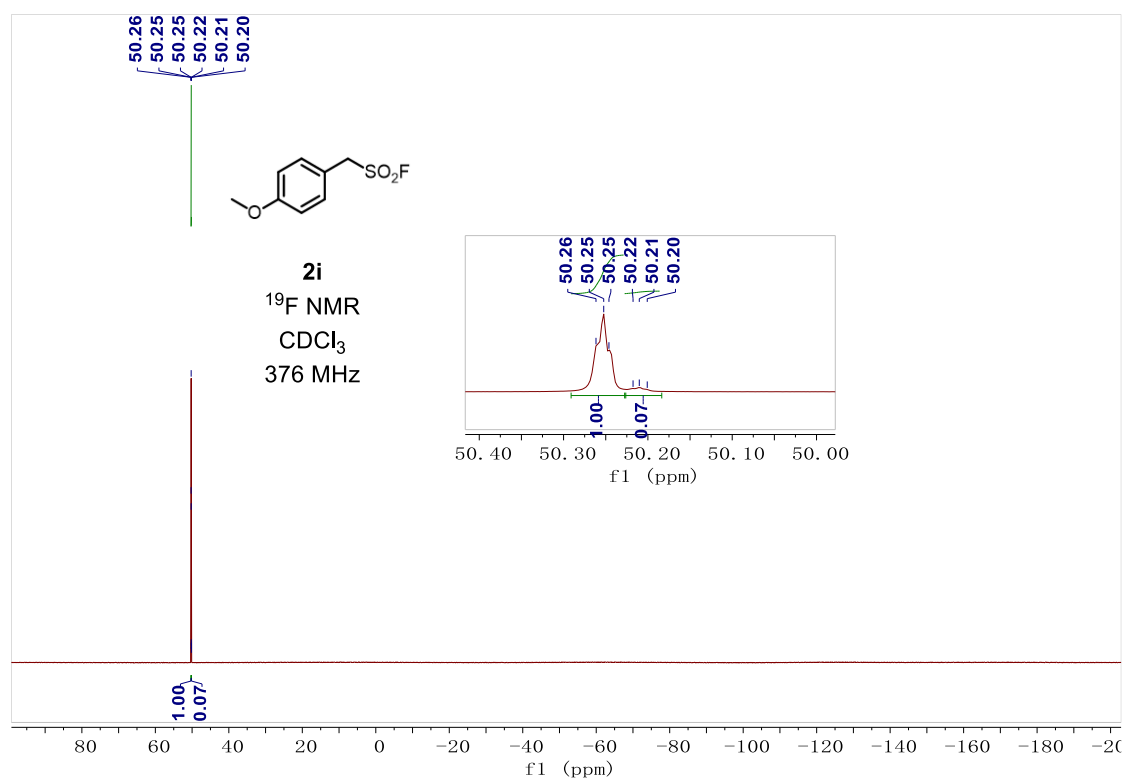

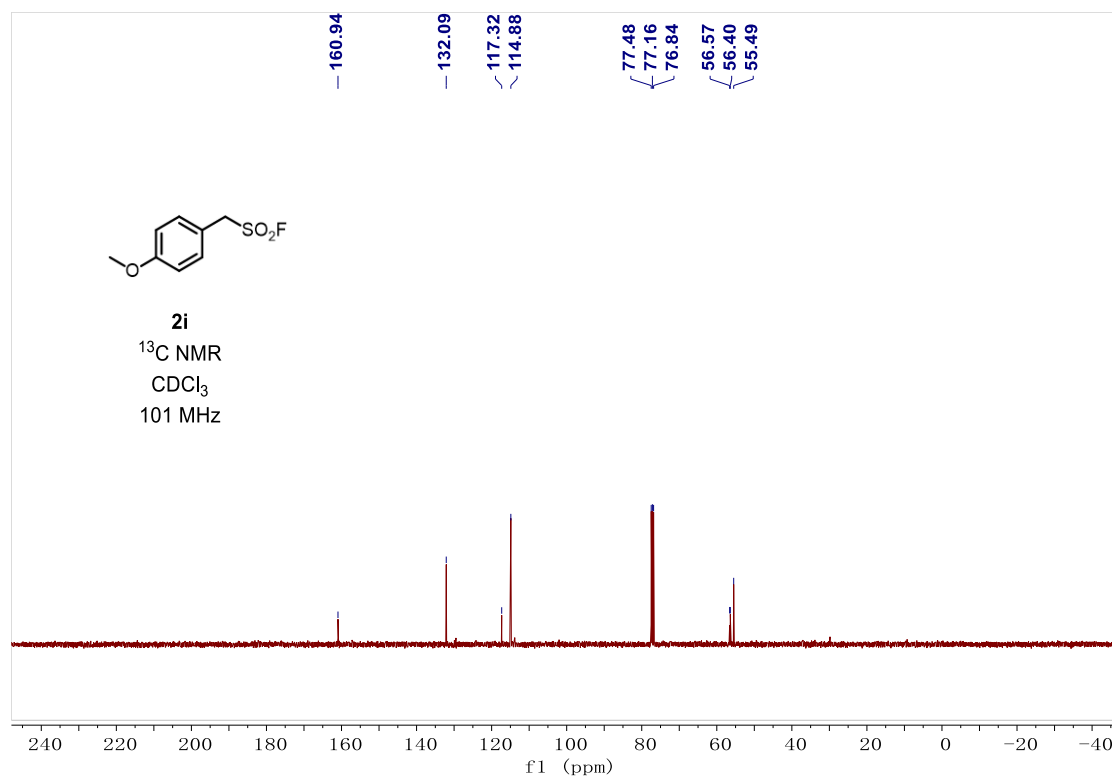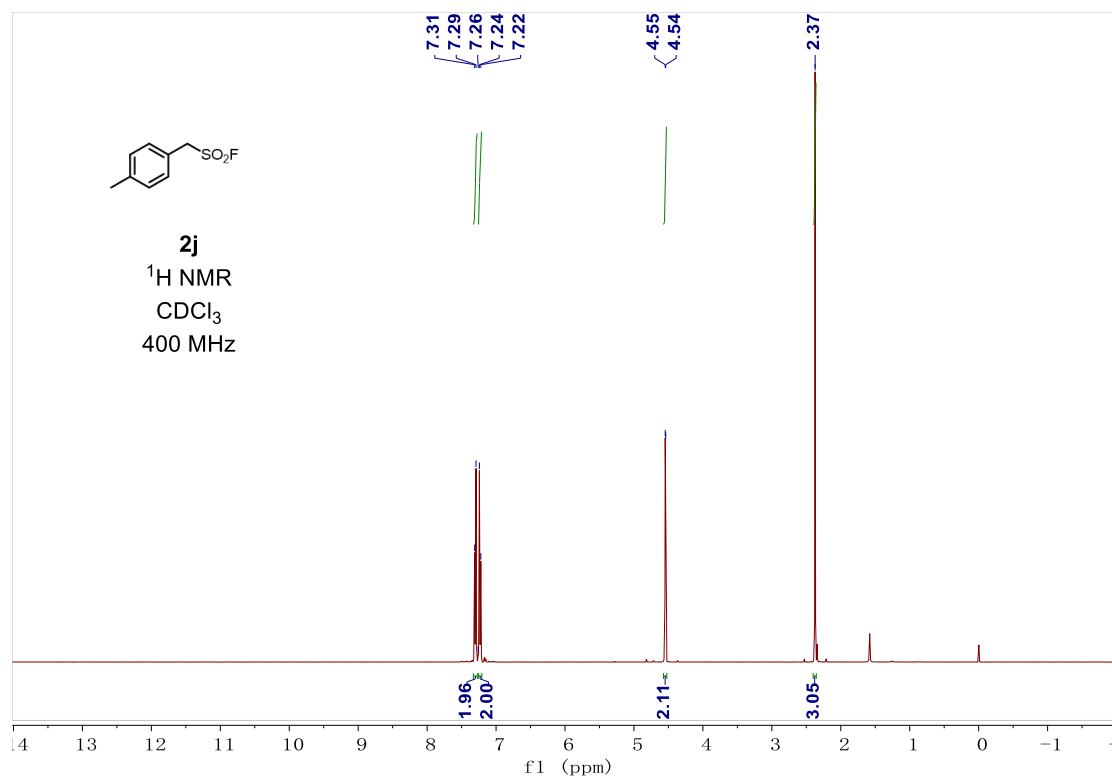

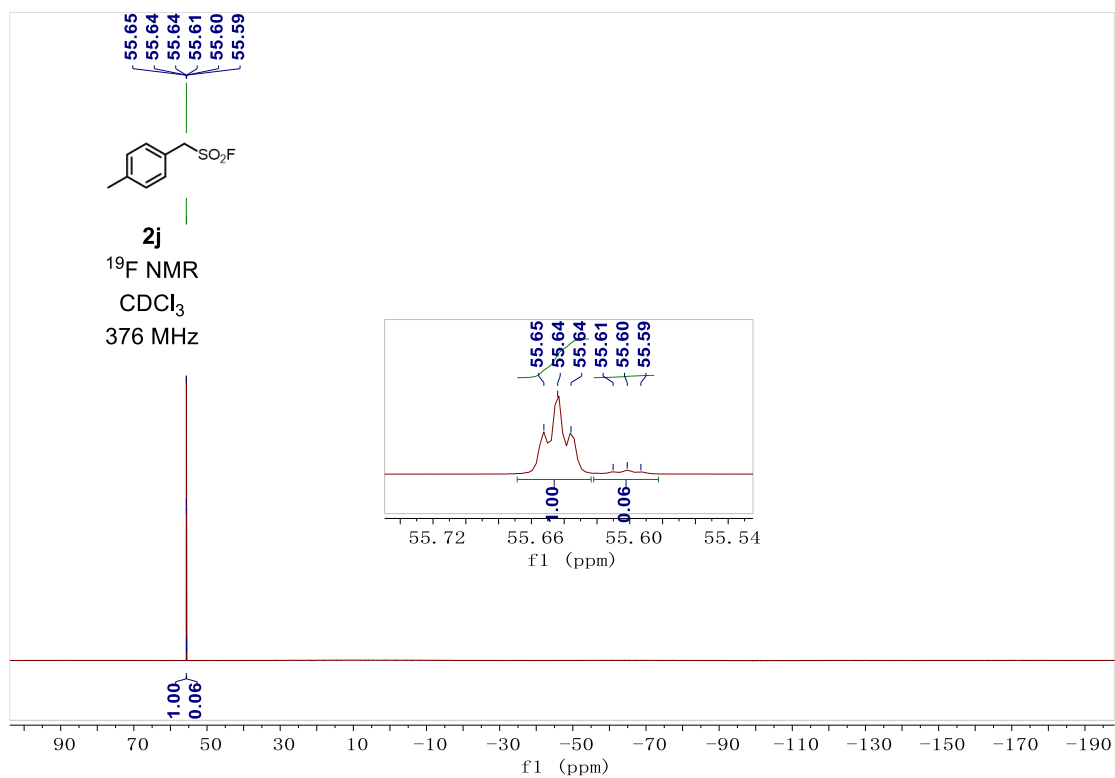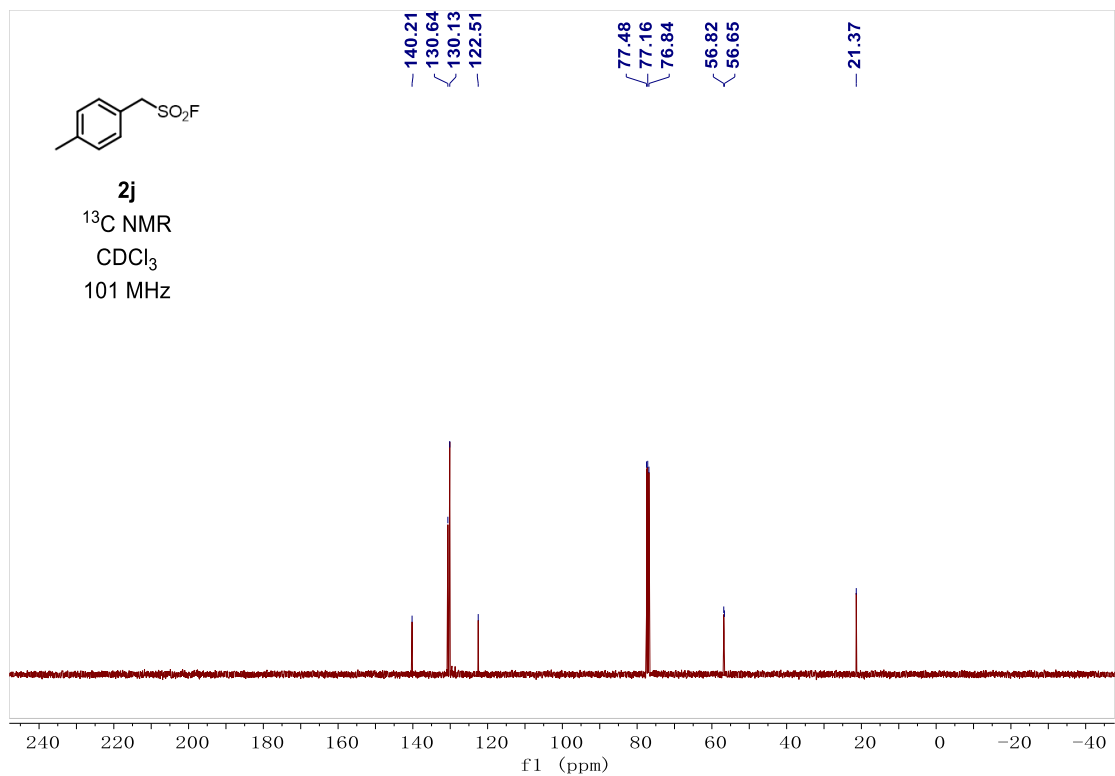



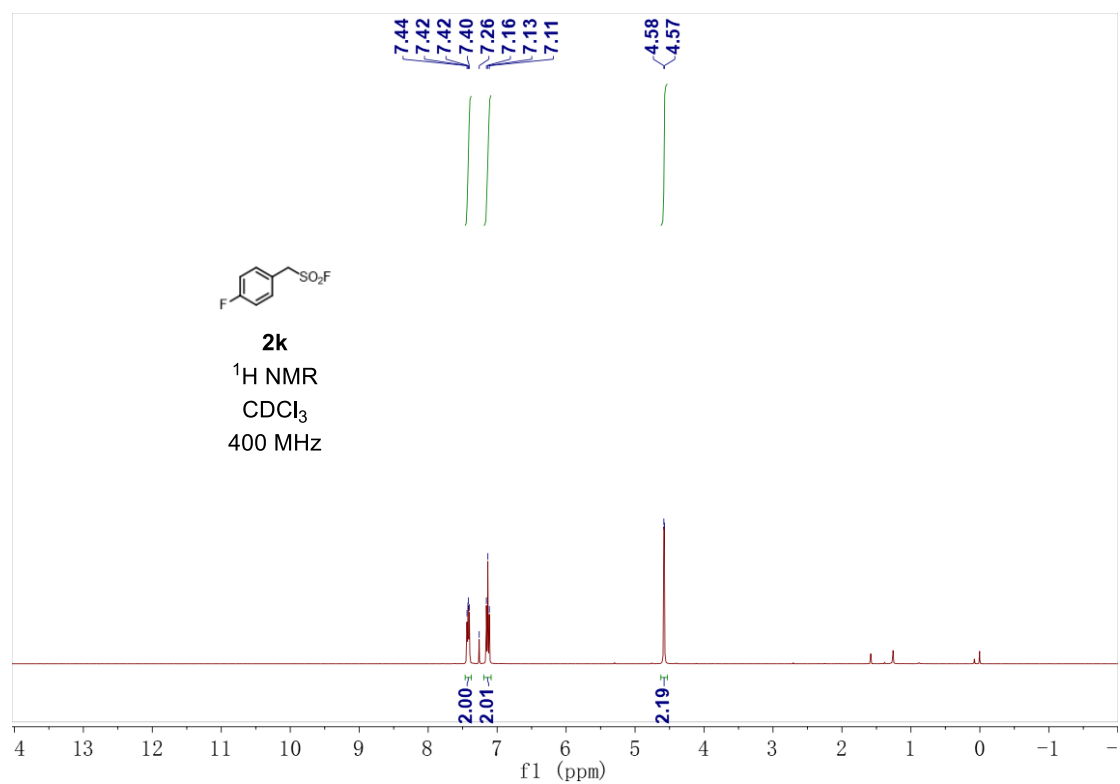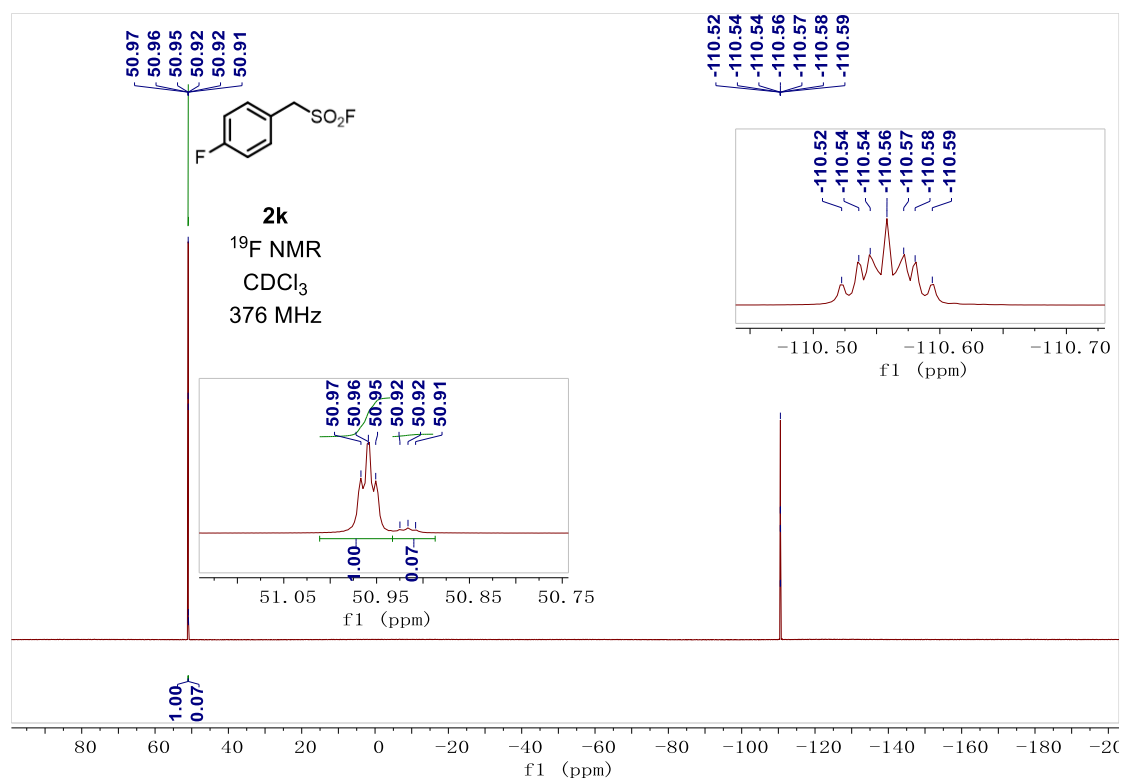

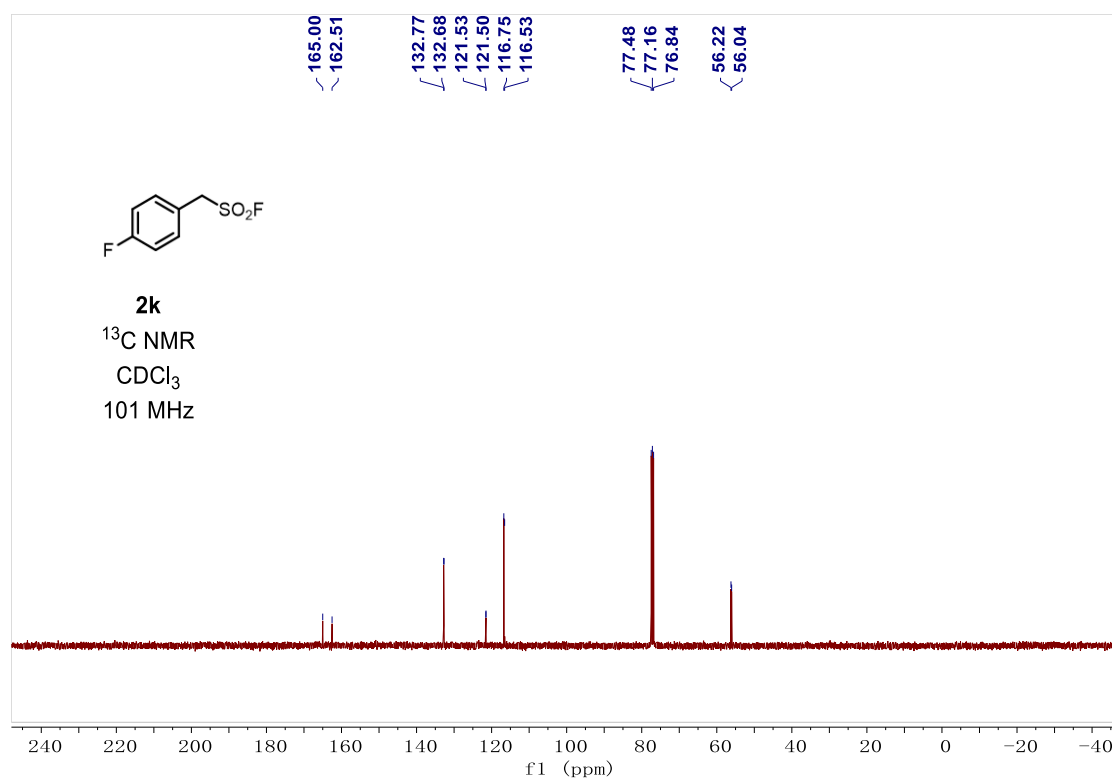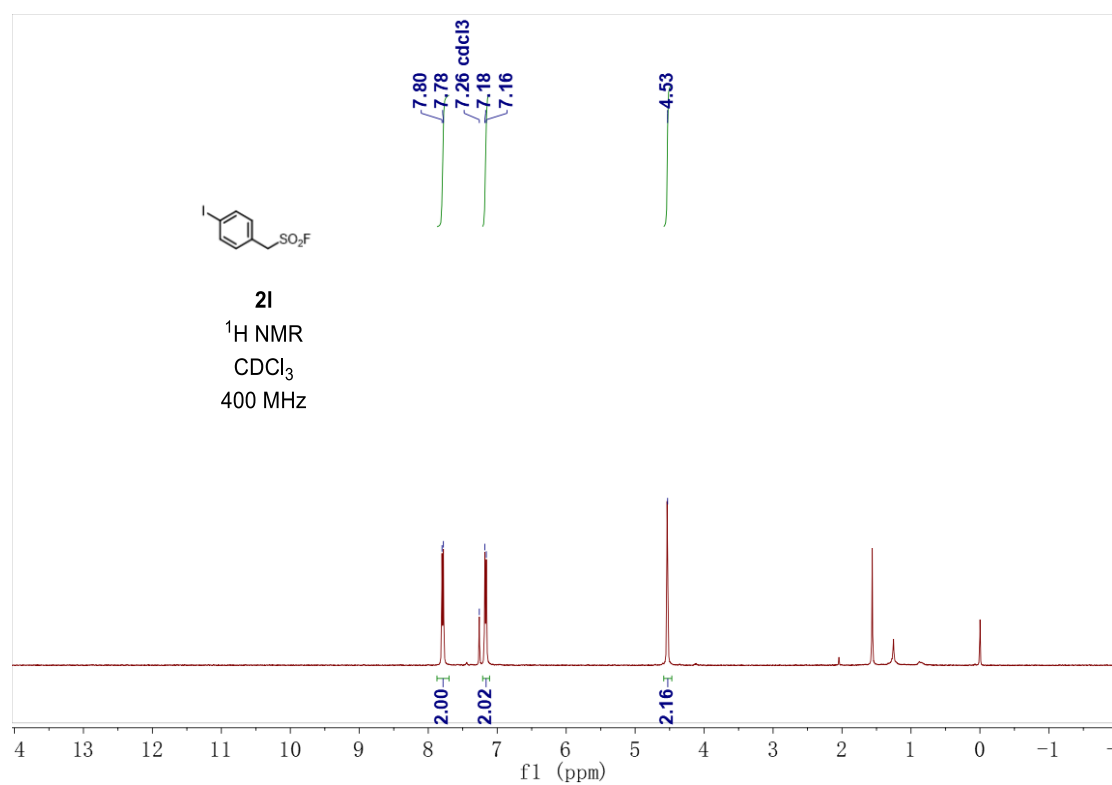

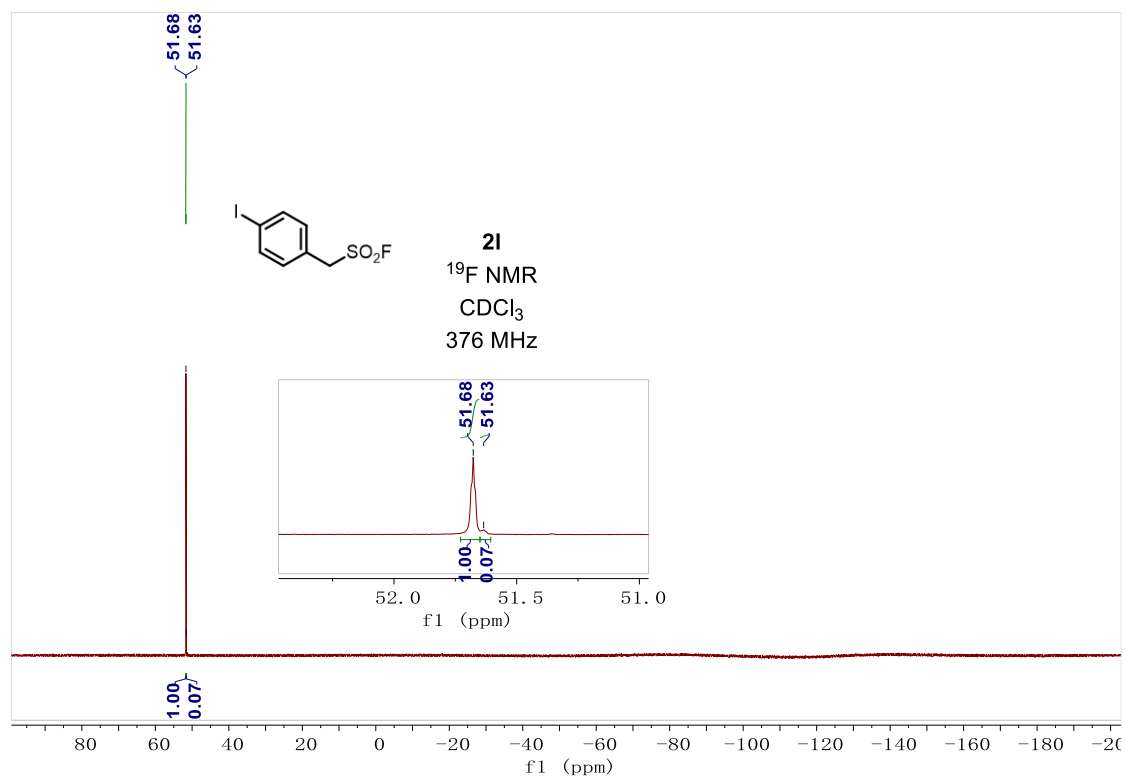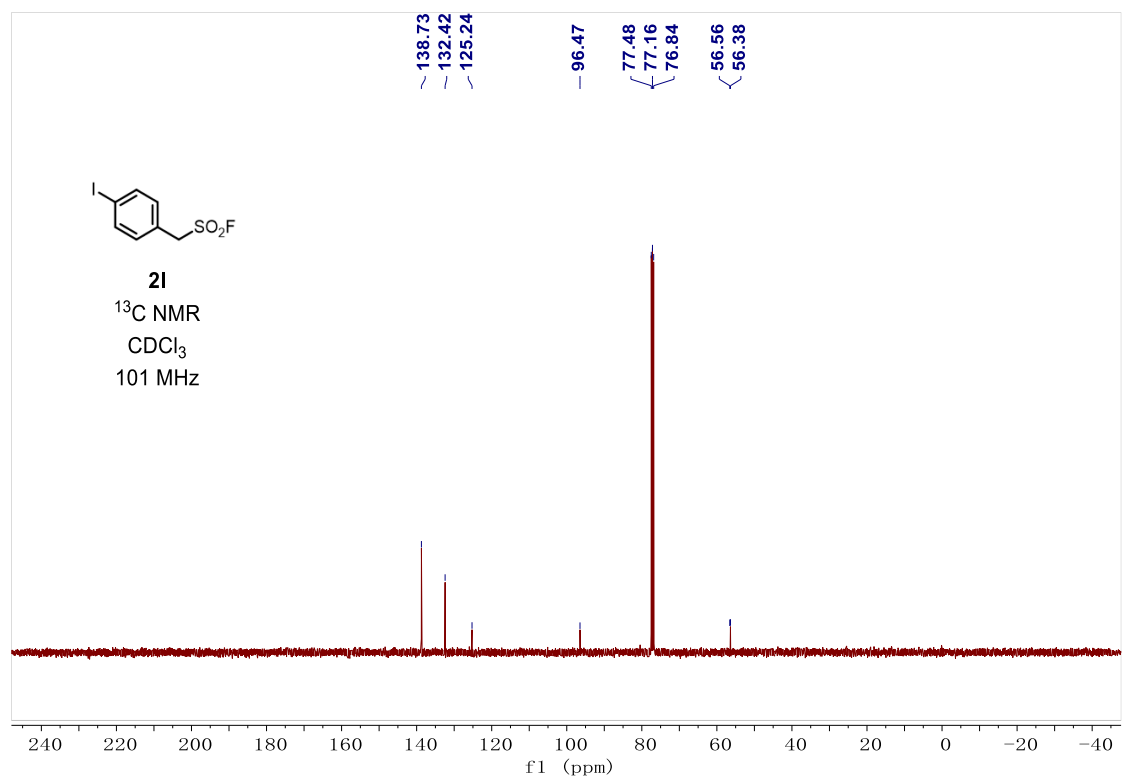

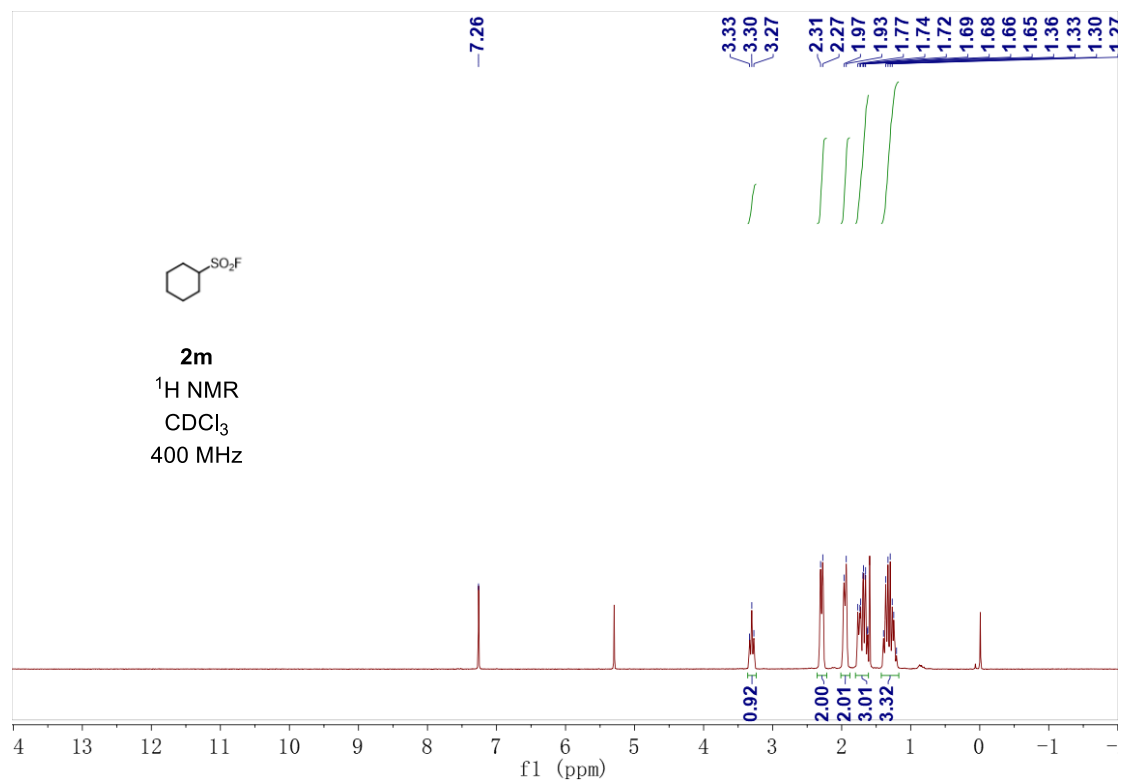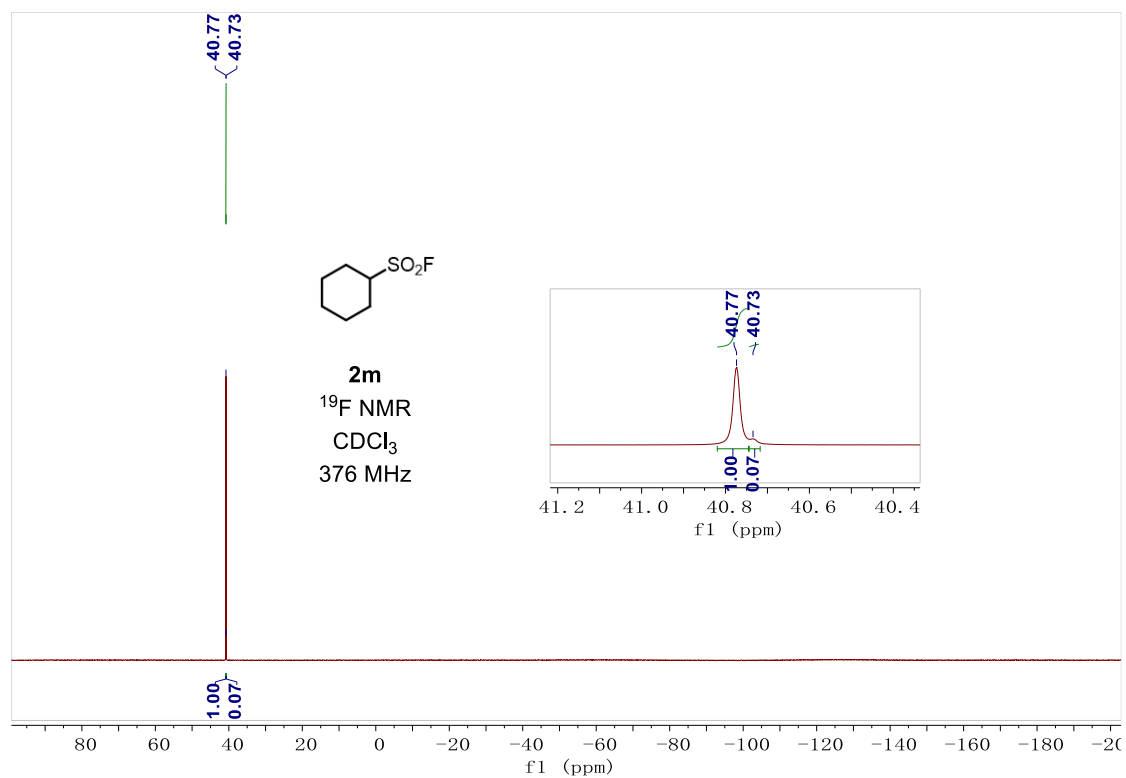

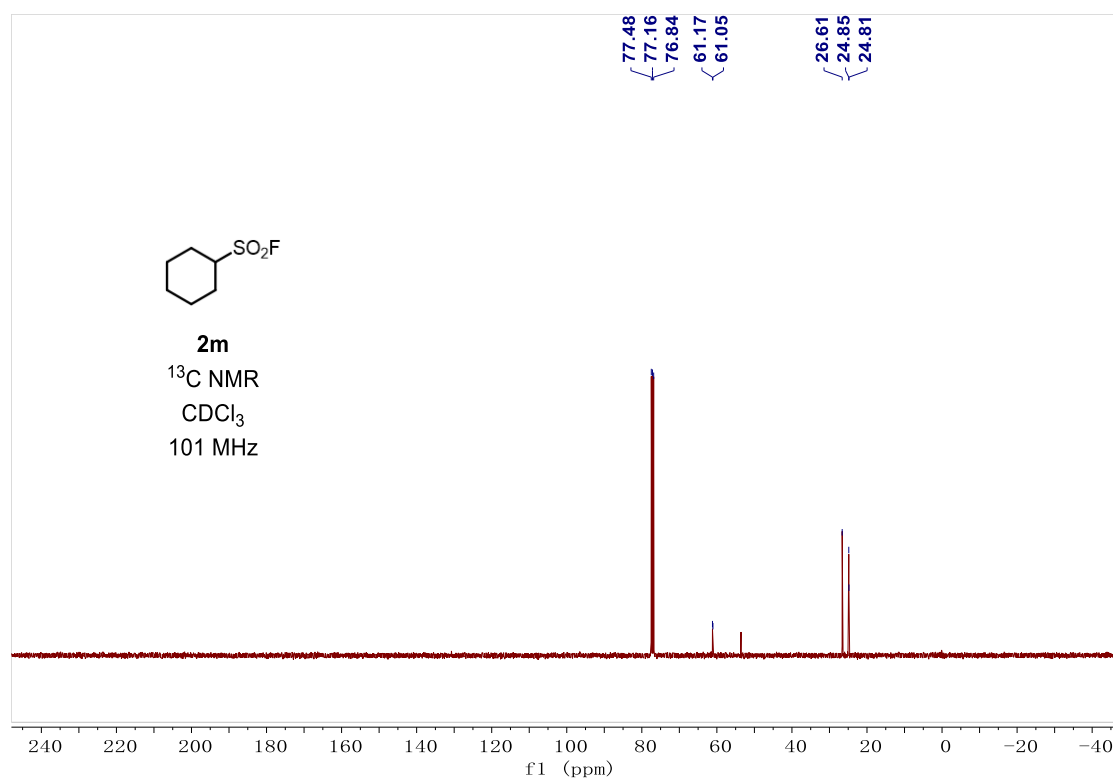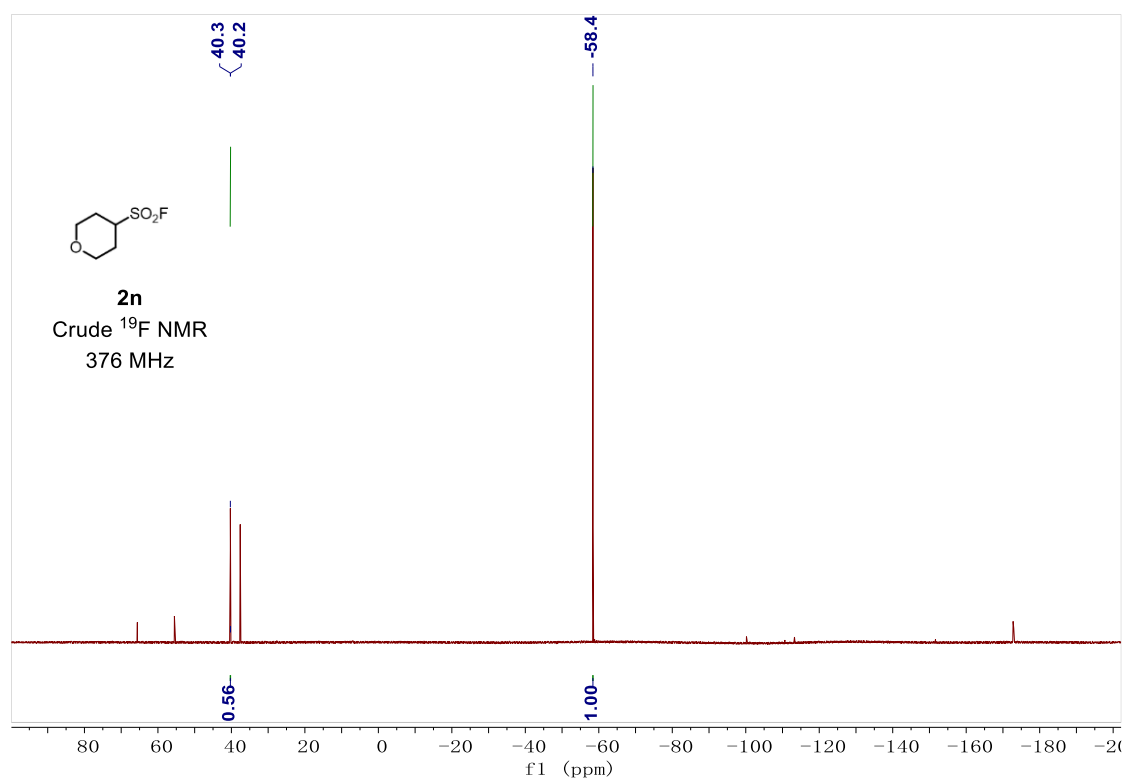

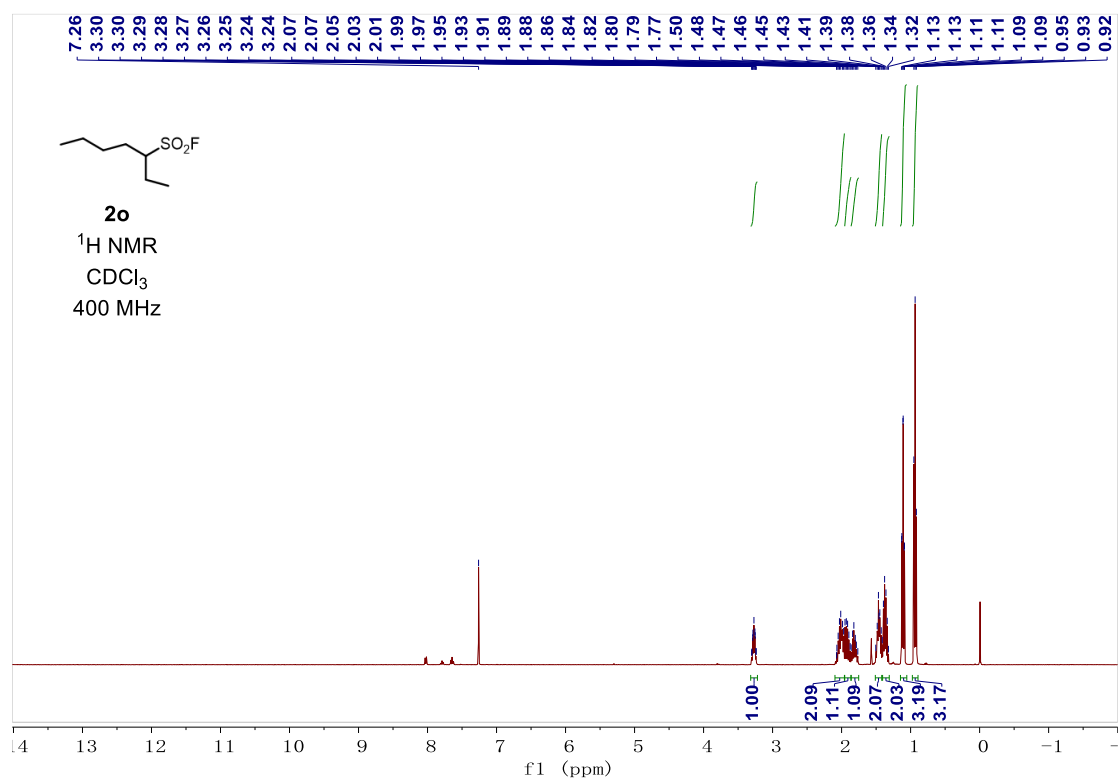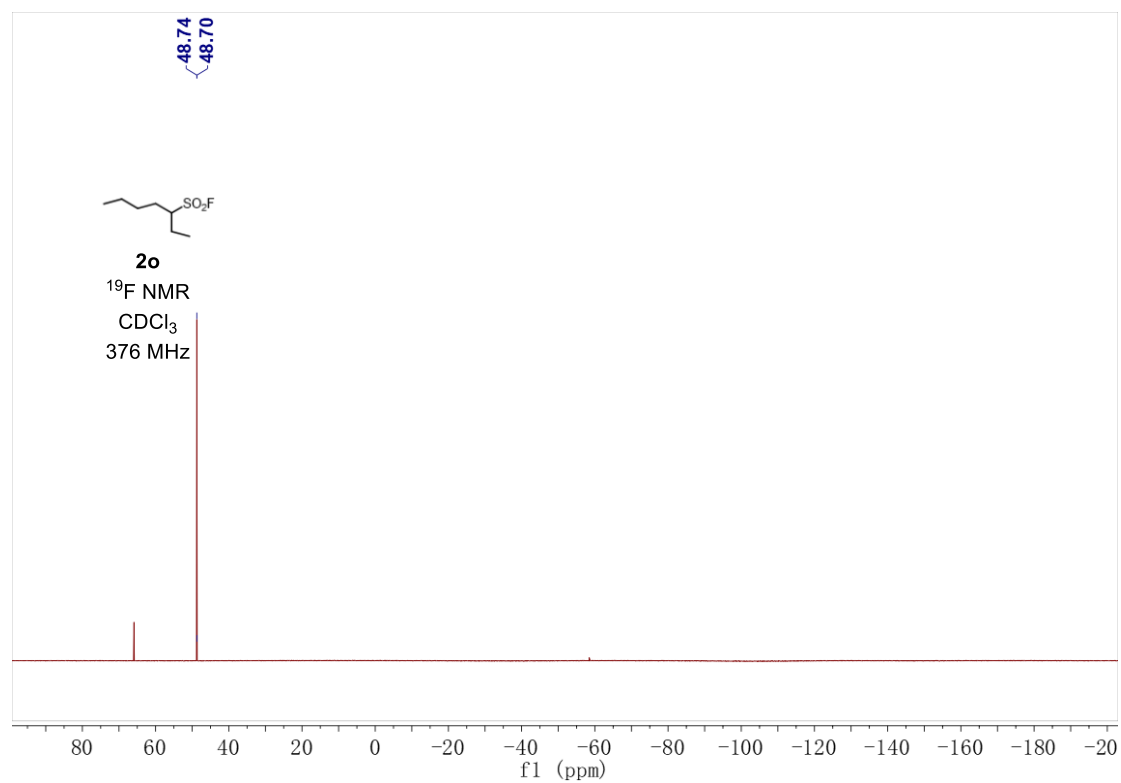

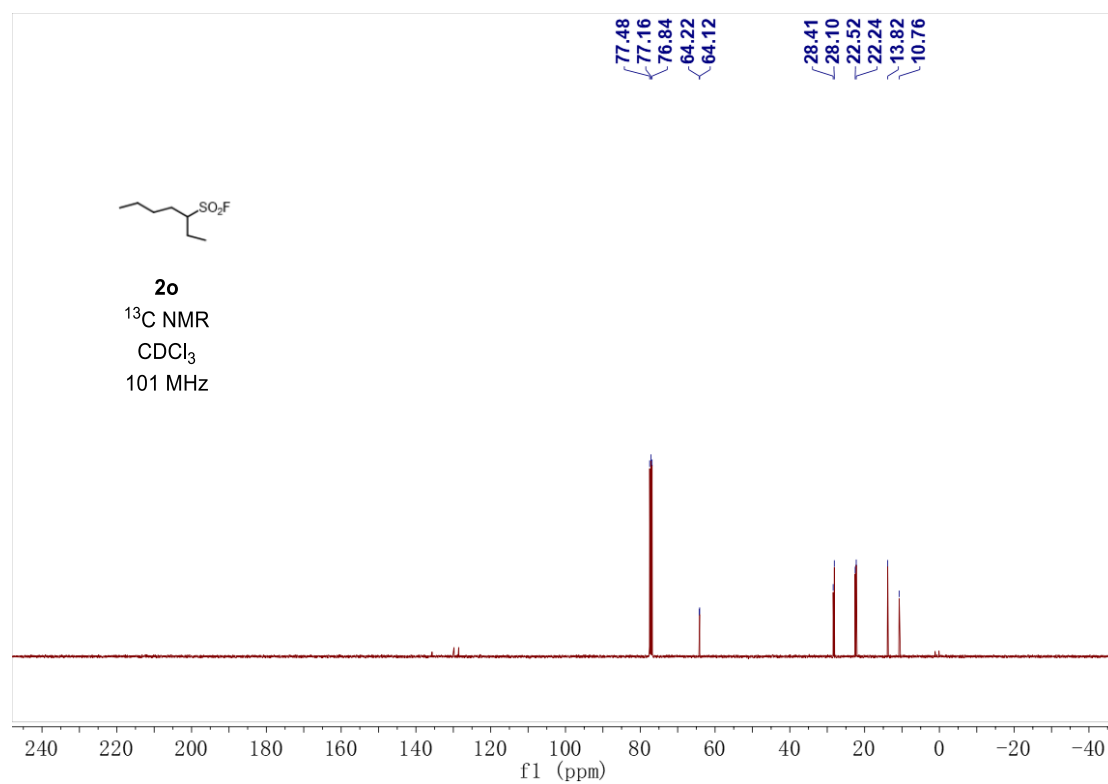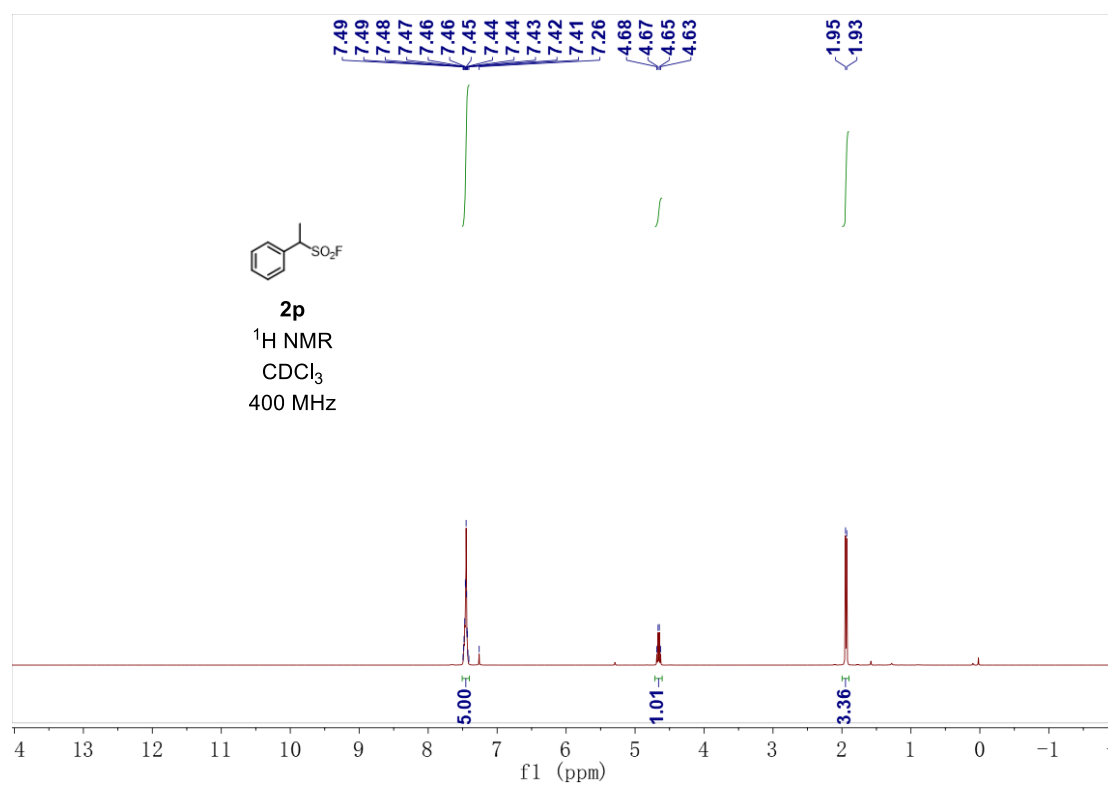

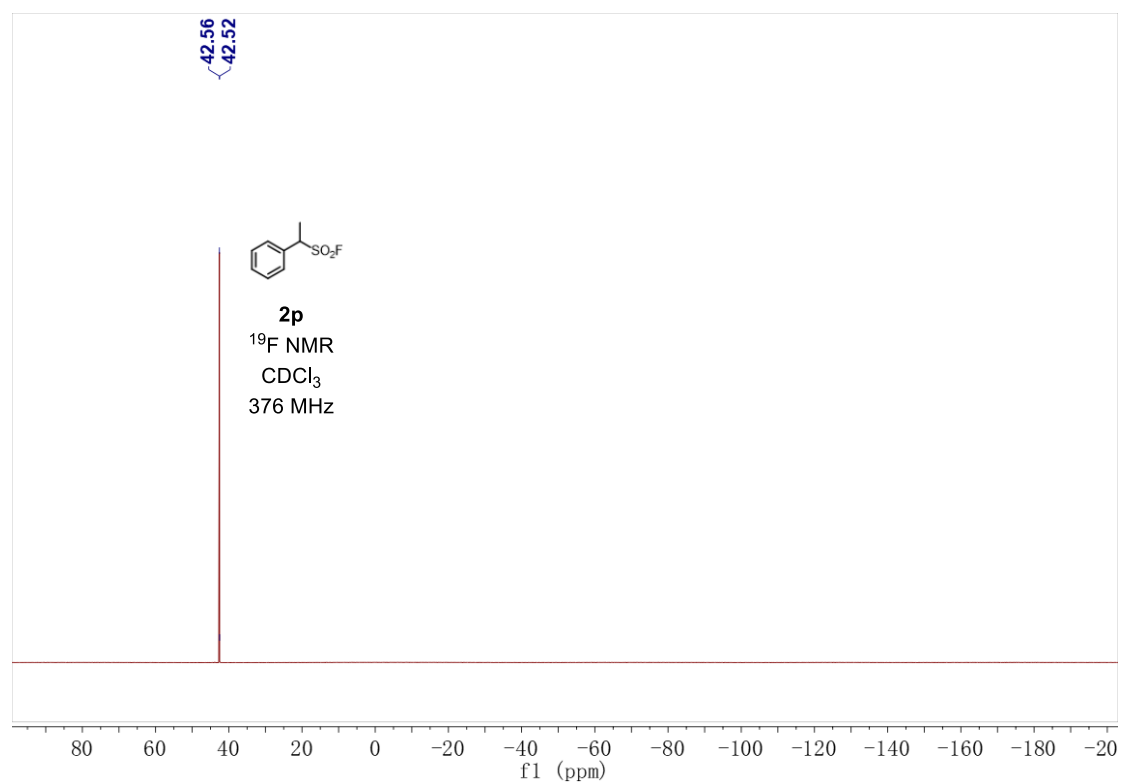

**<sup>13</sup>C NMR spectrum of phenylethanesulfonyl fluoride (101 MHz, CDCl<sub>3</sub>):**

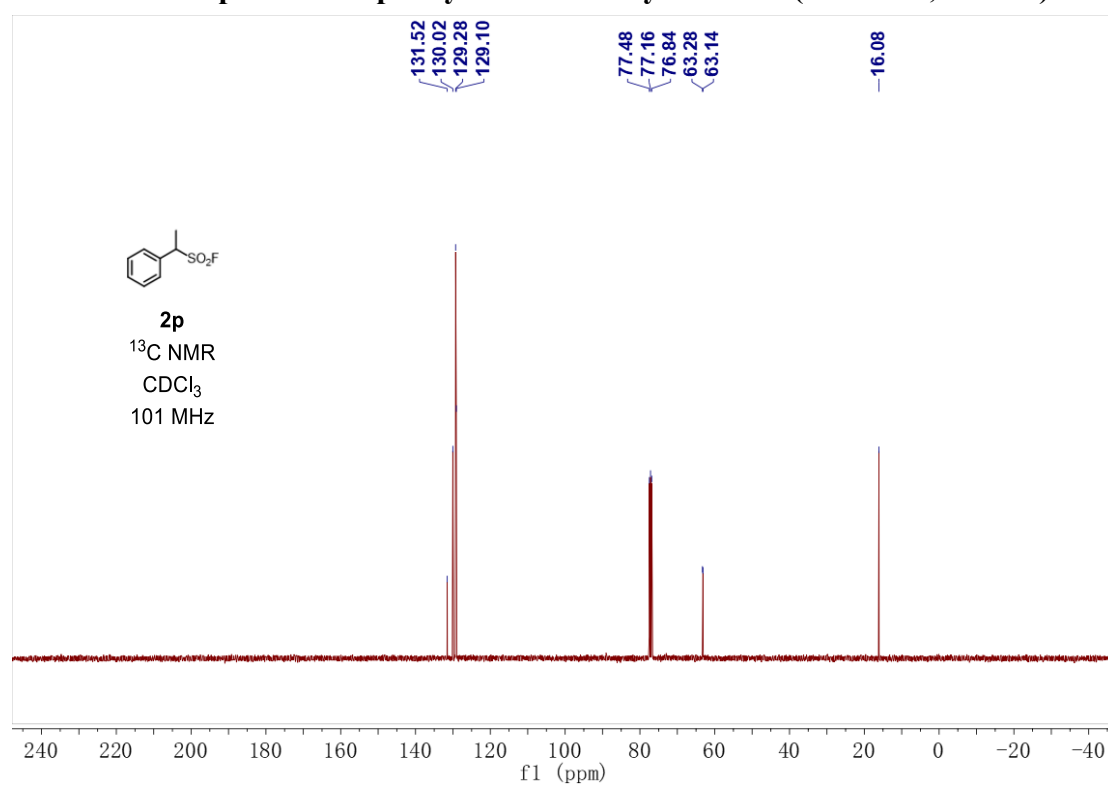



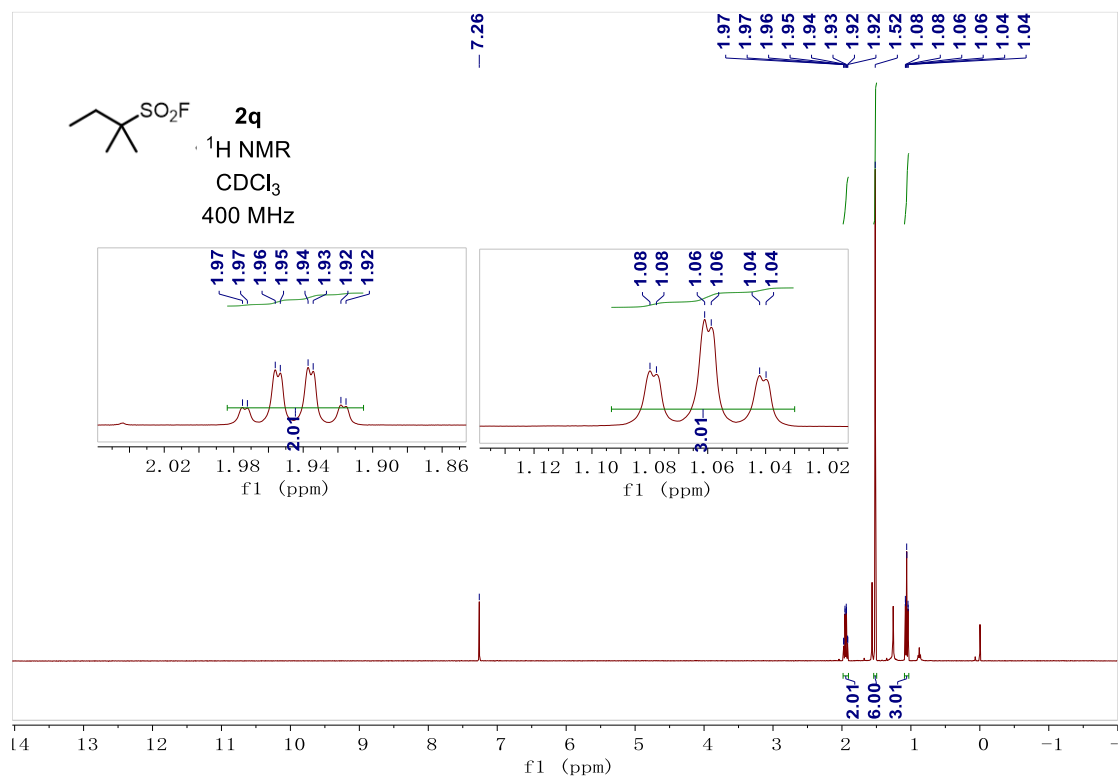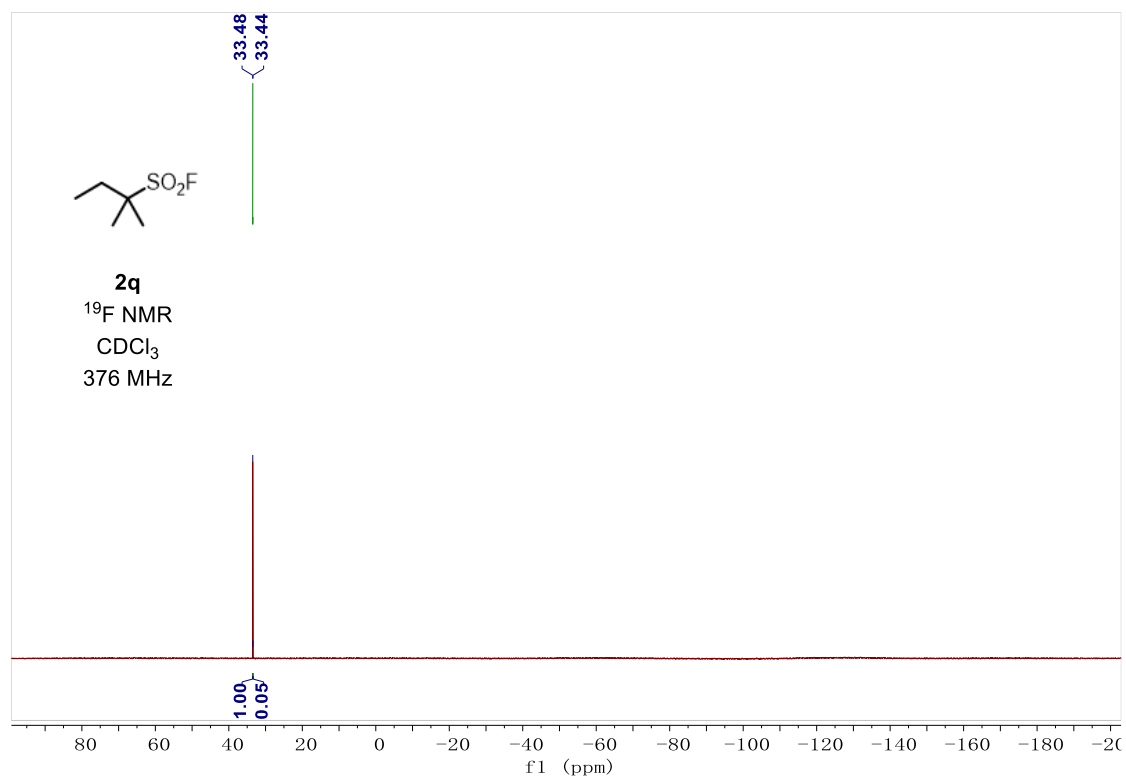

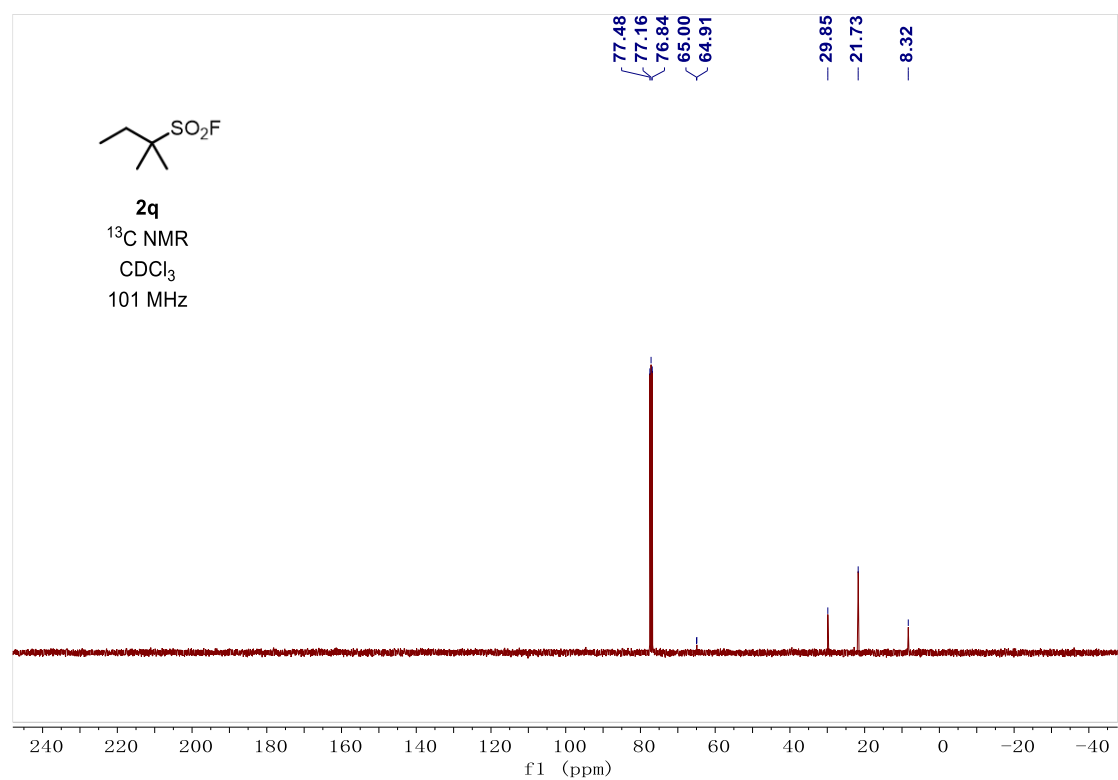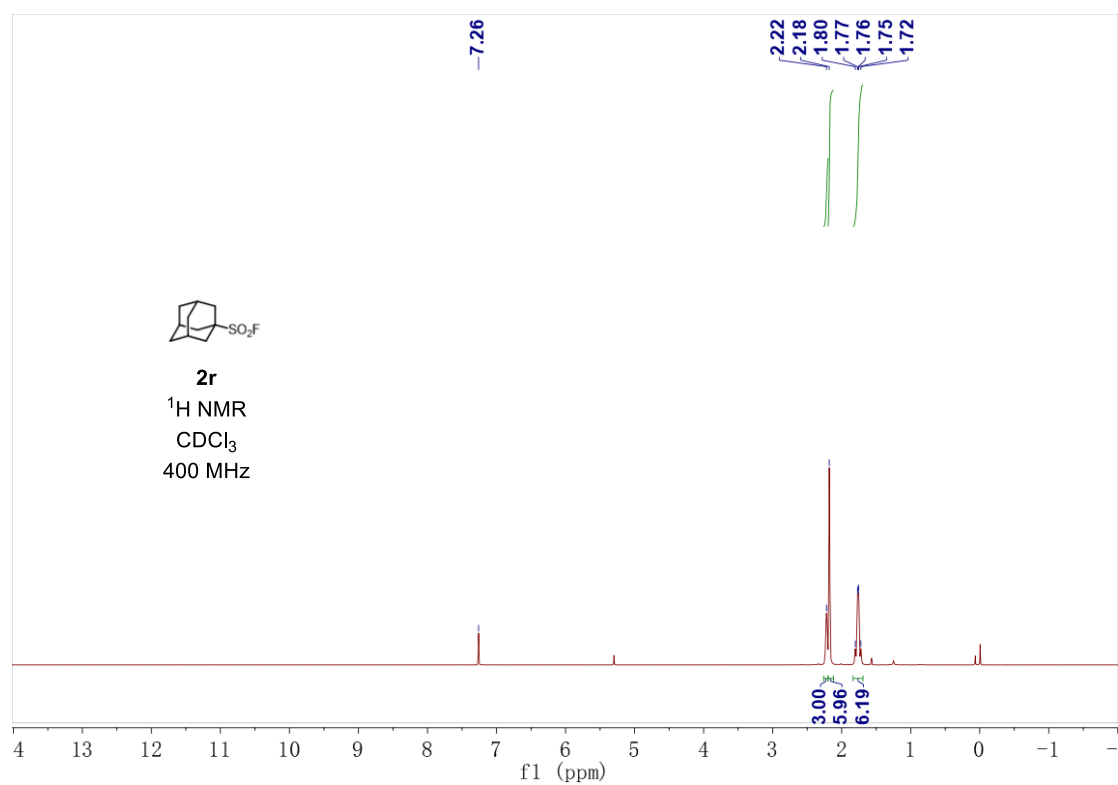

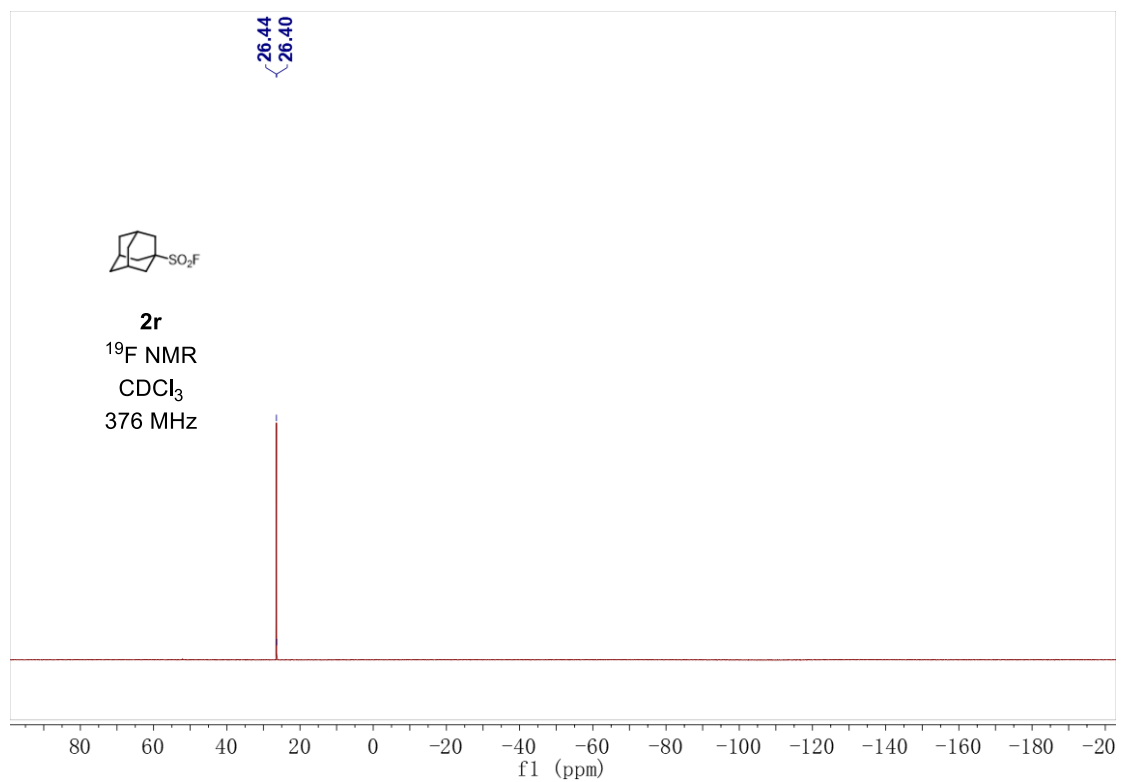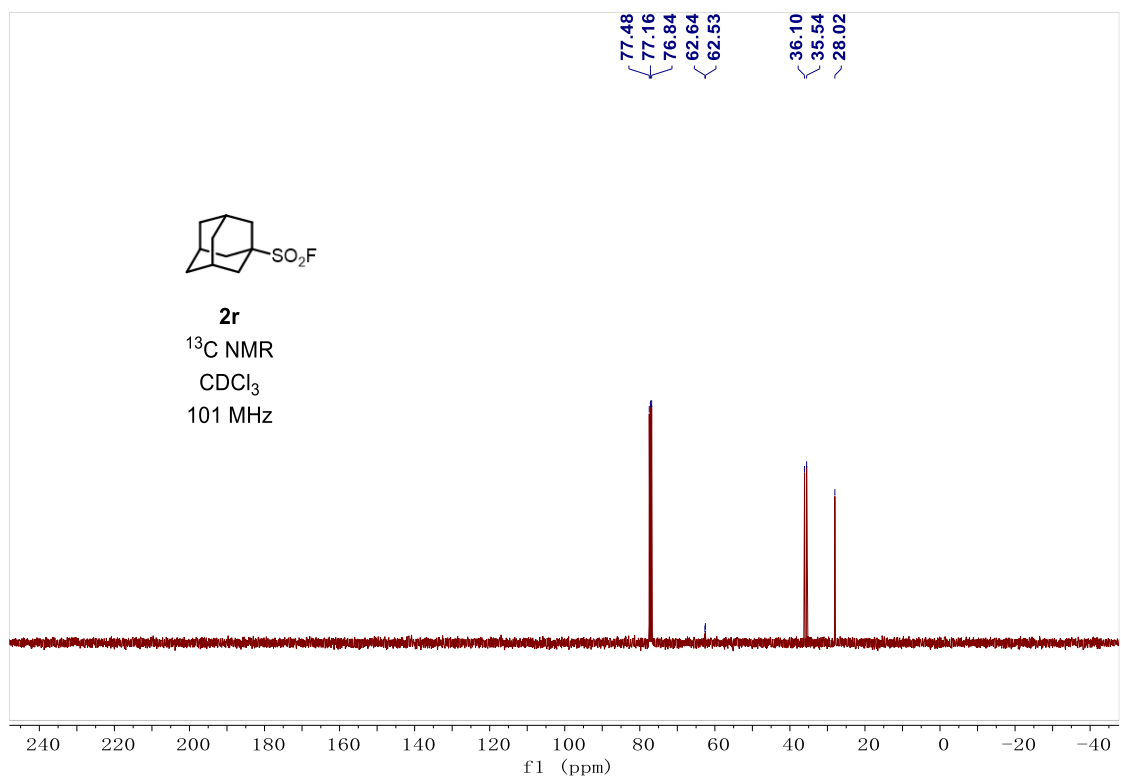

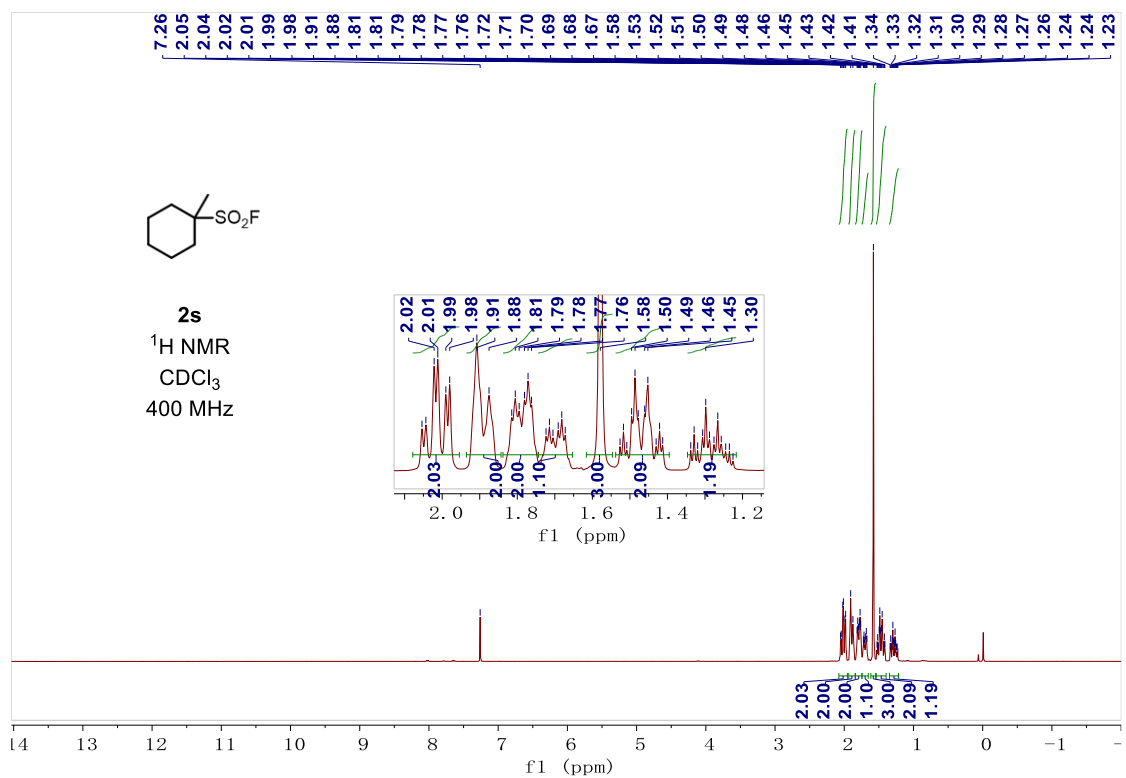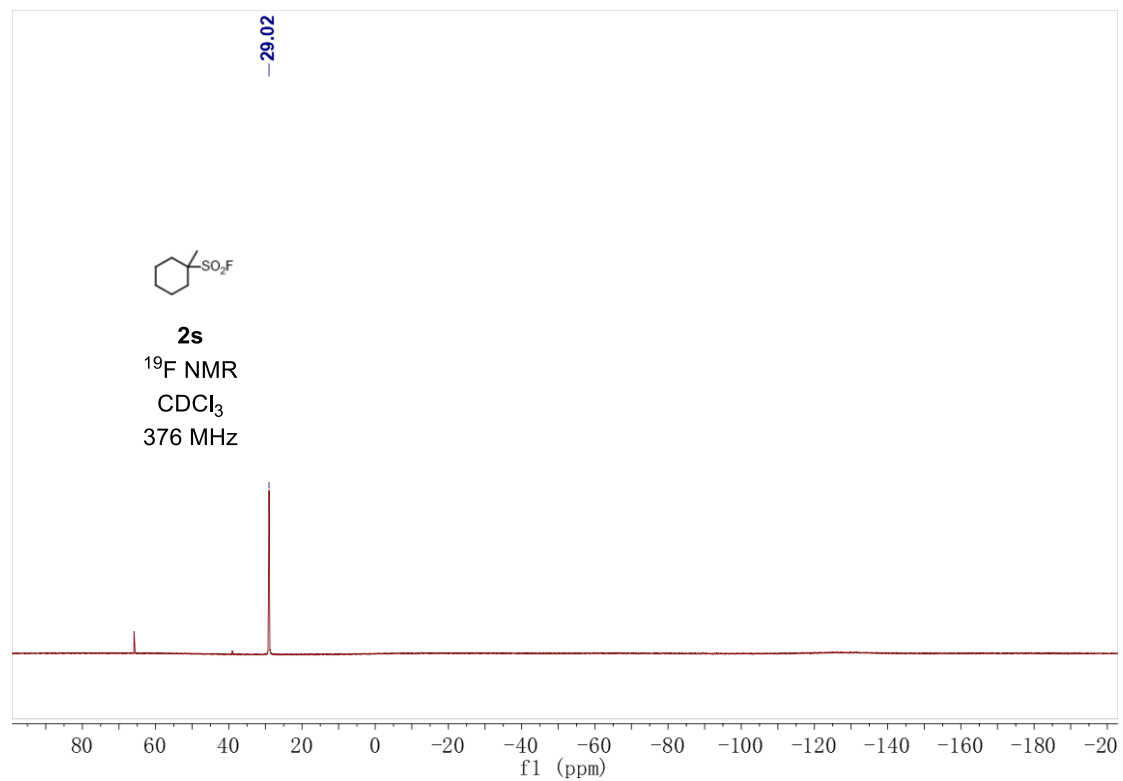

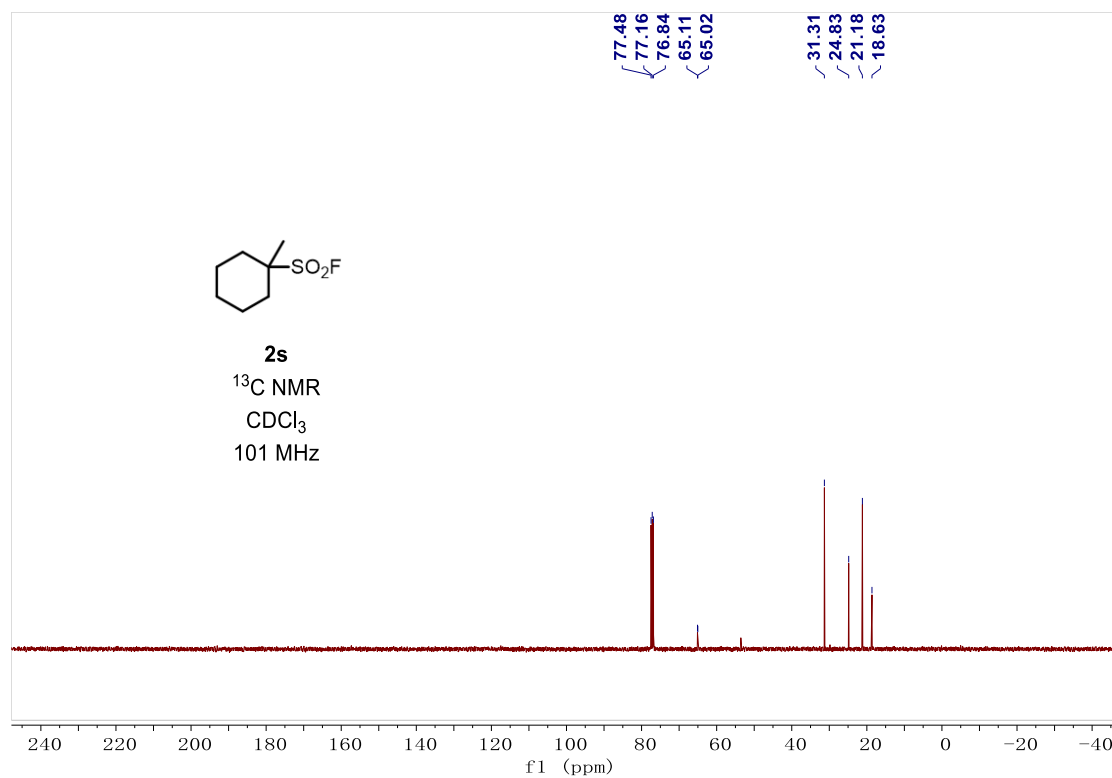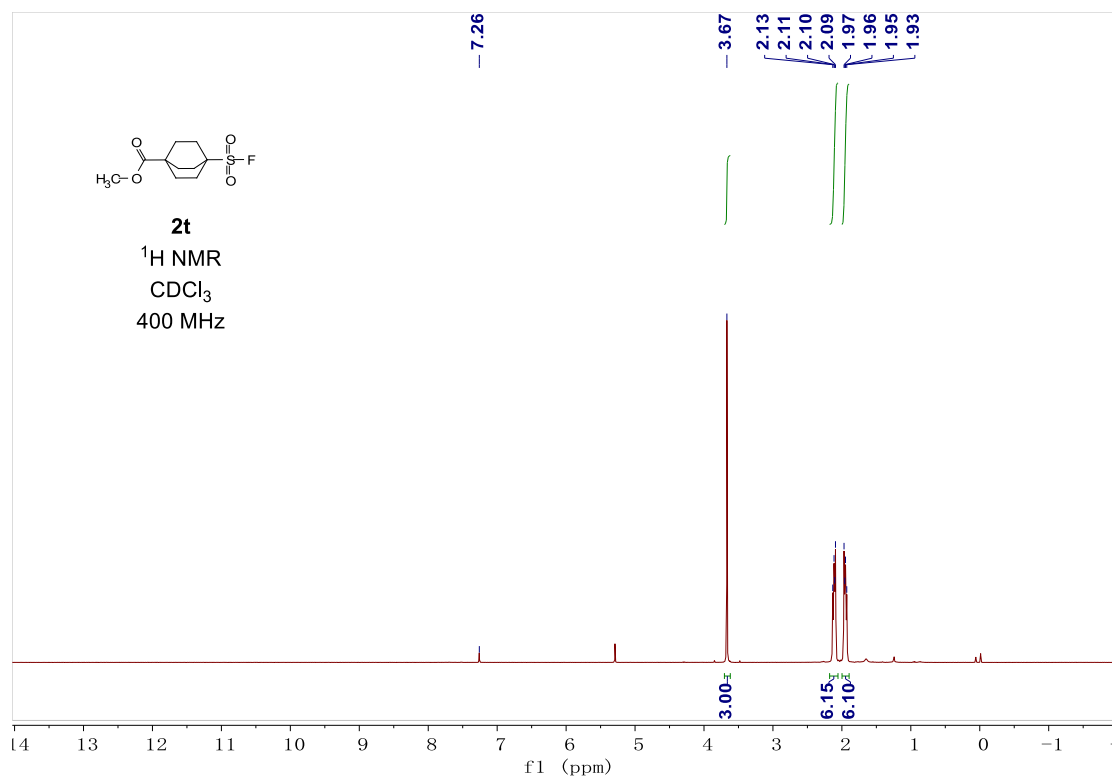

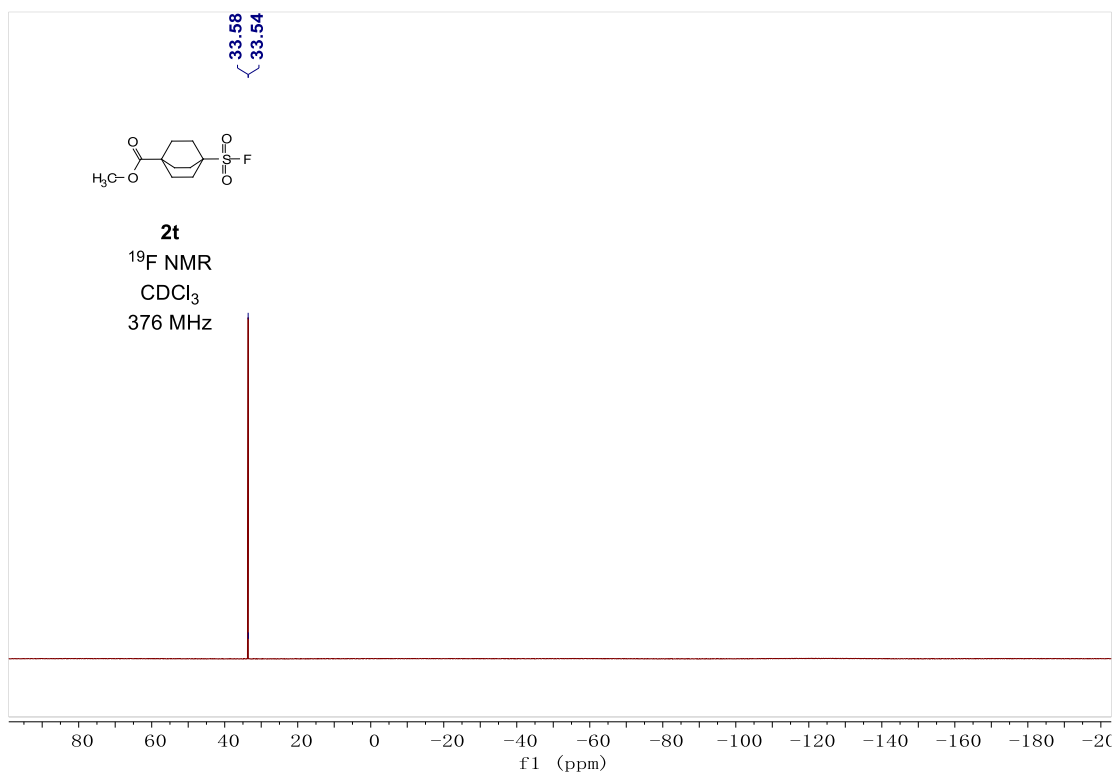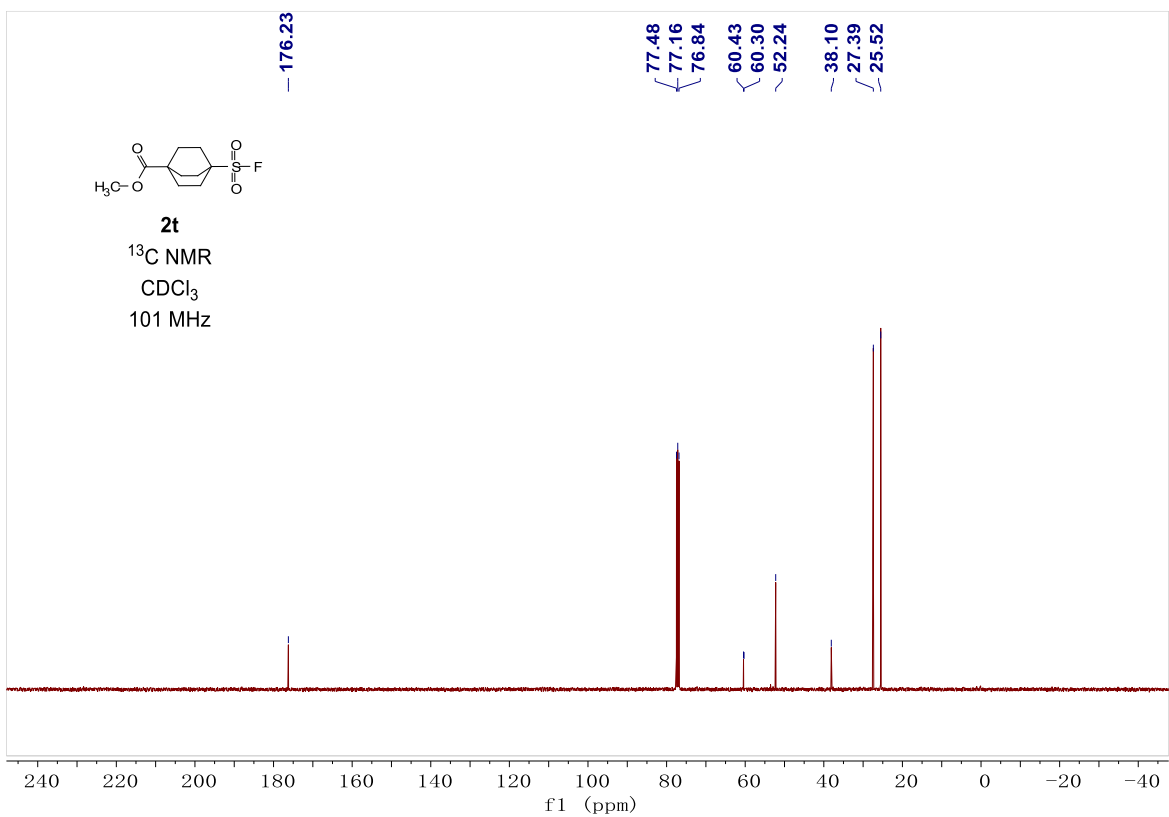

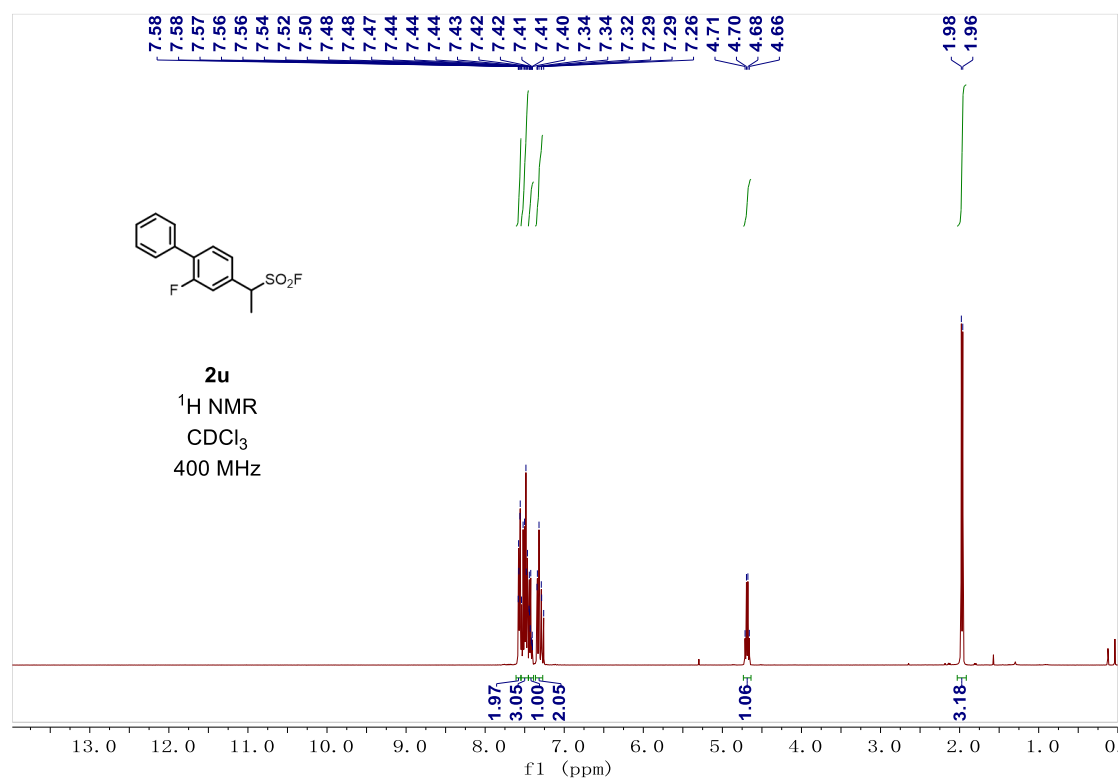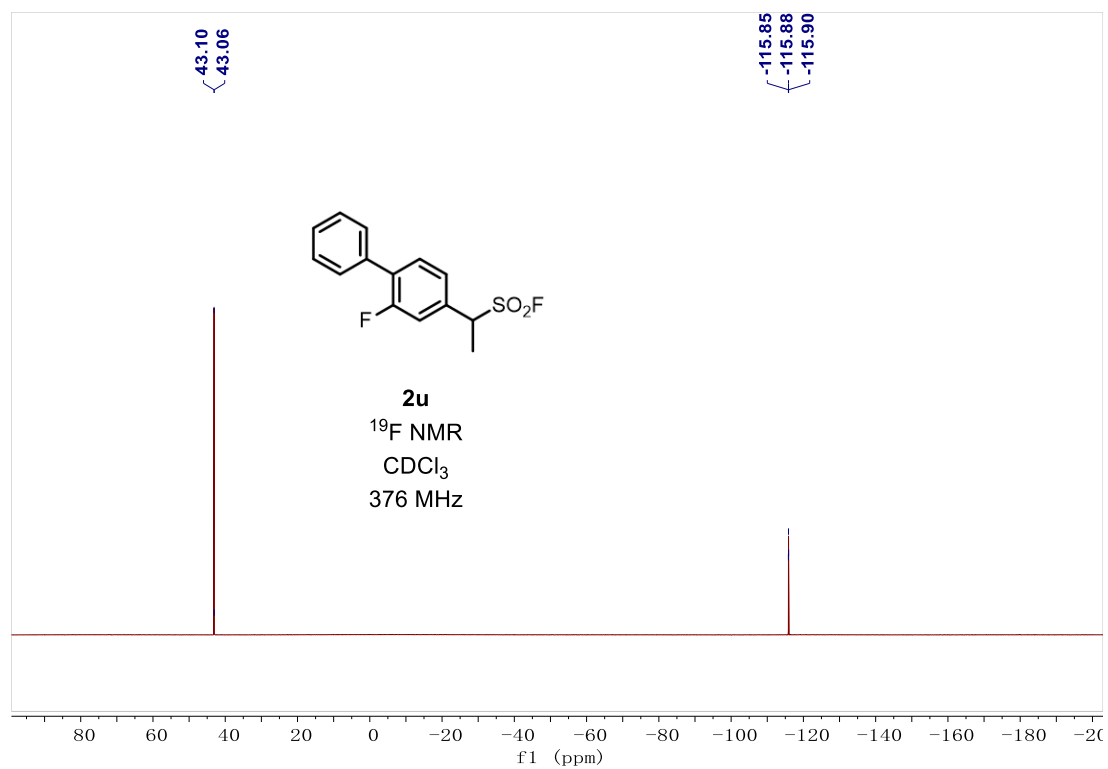

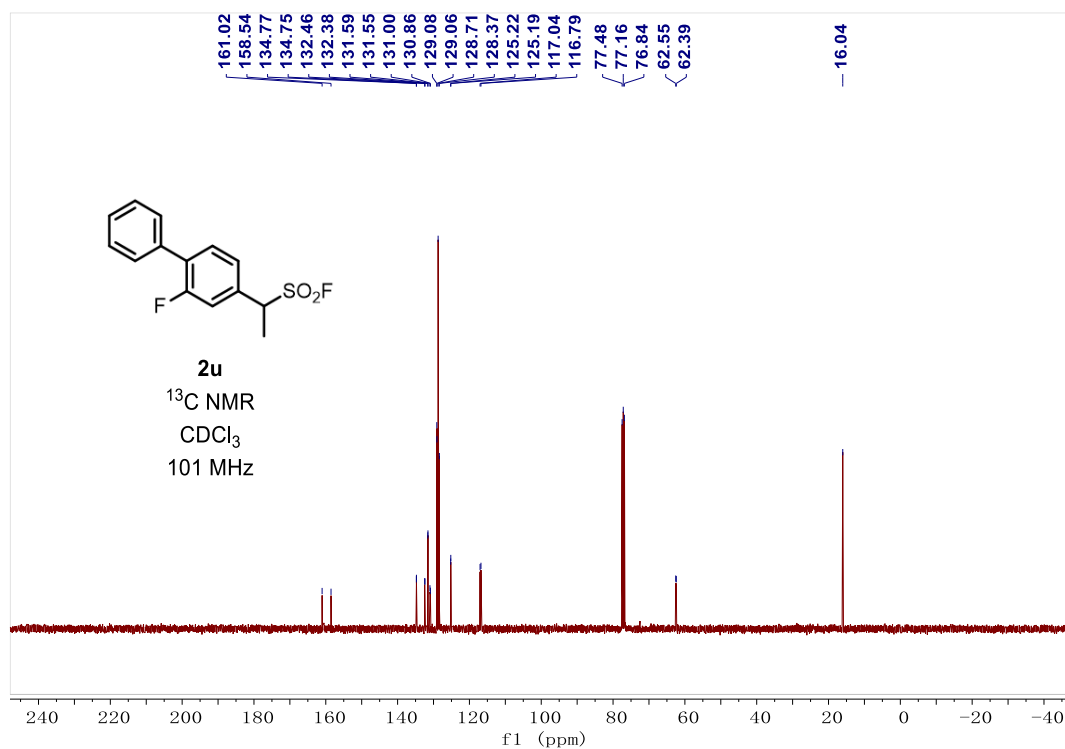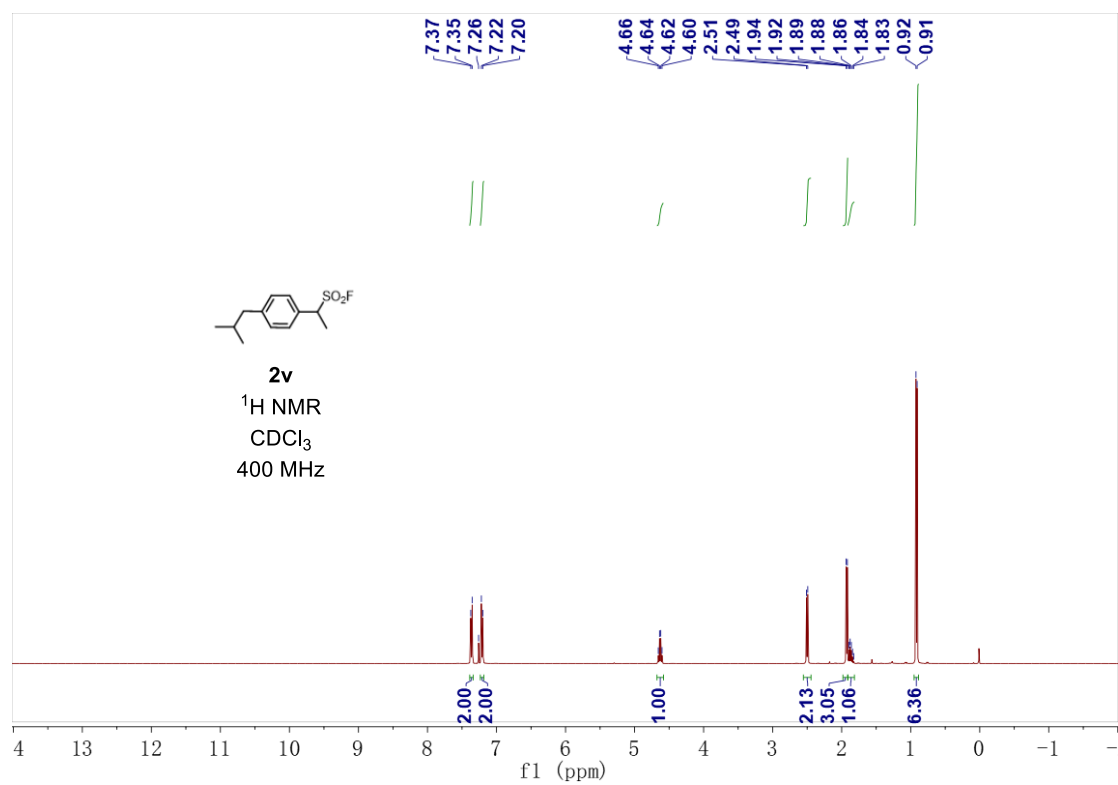



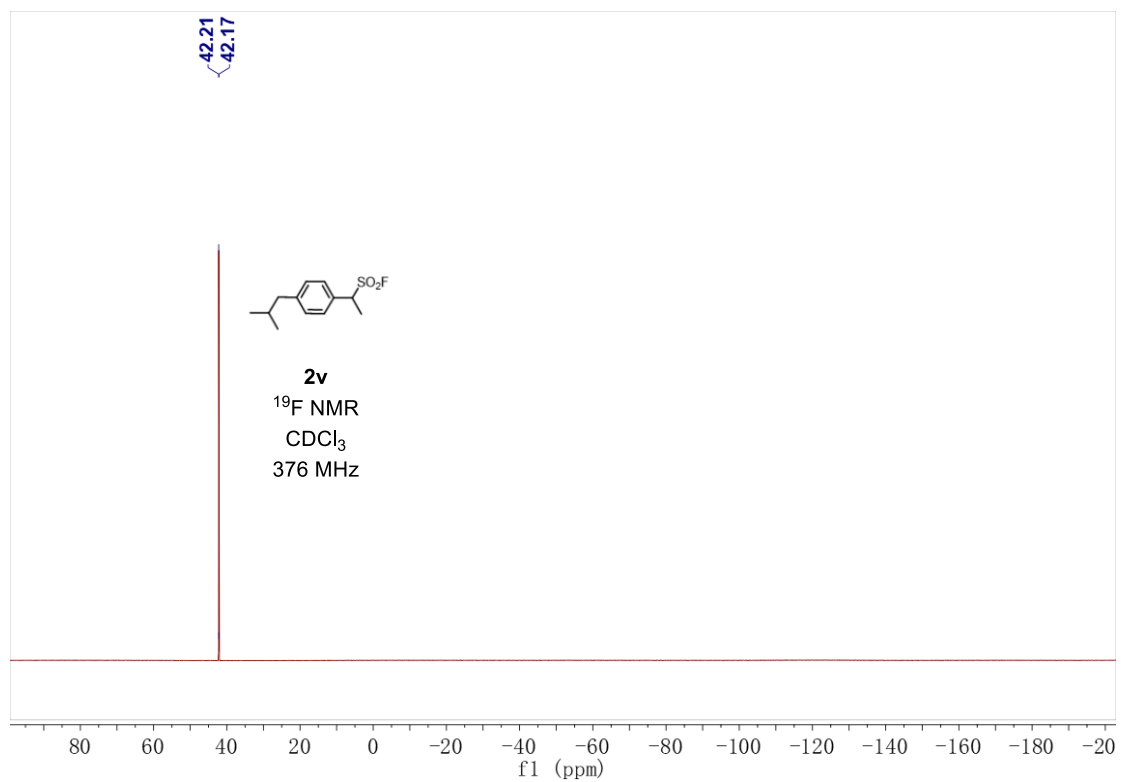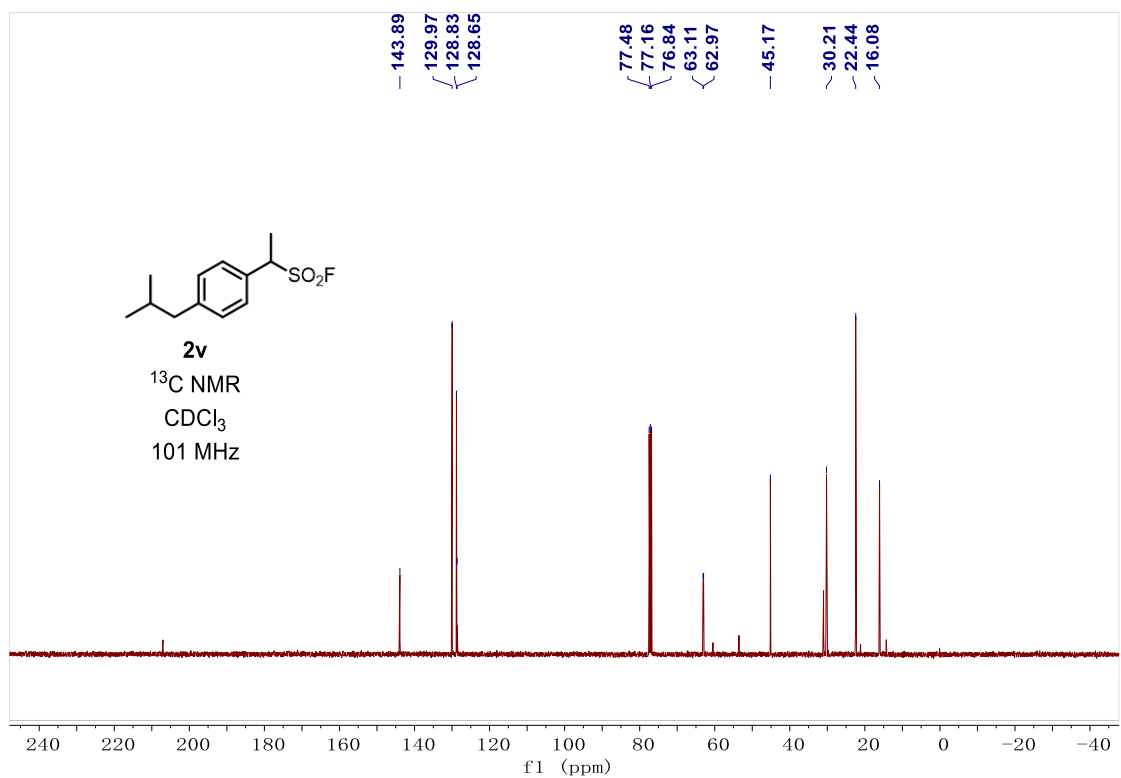

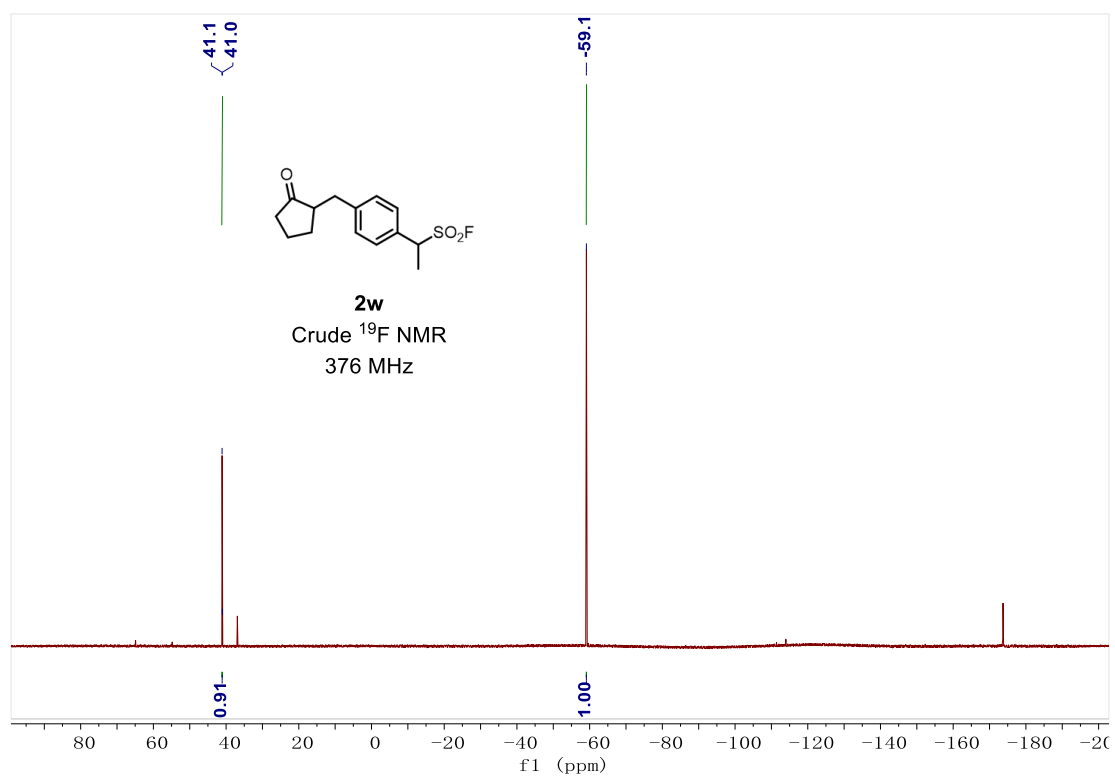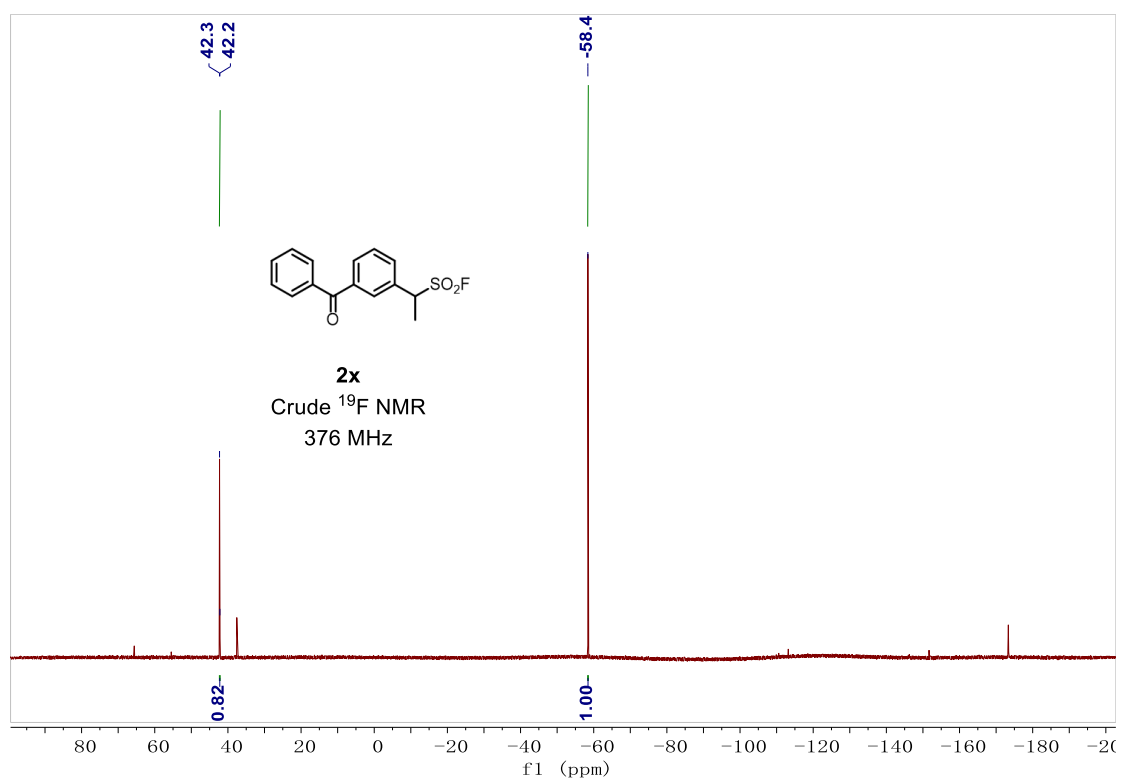

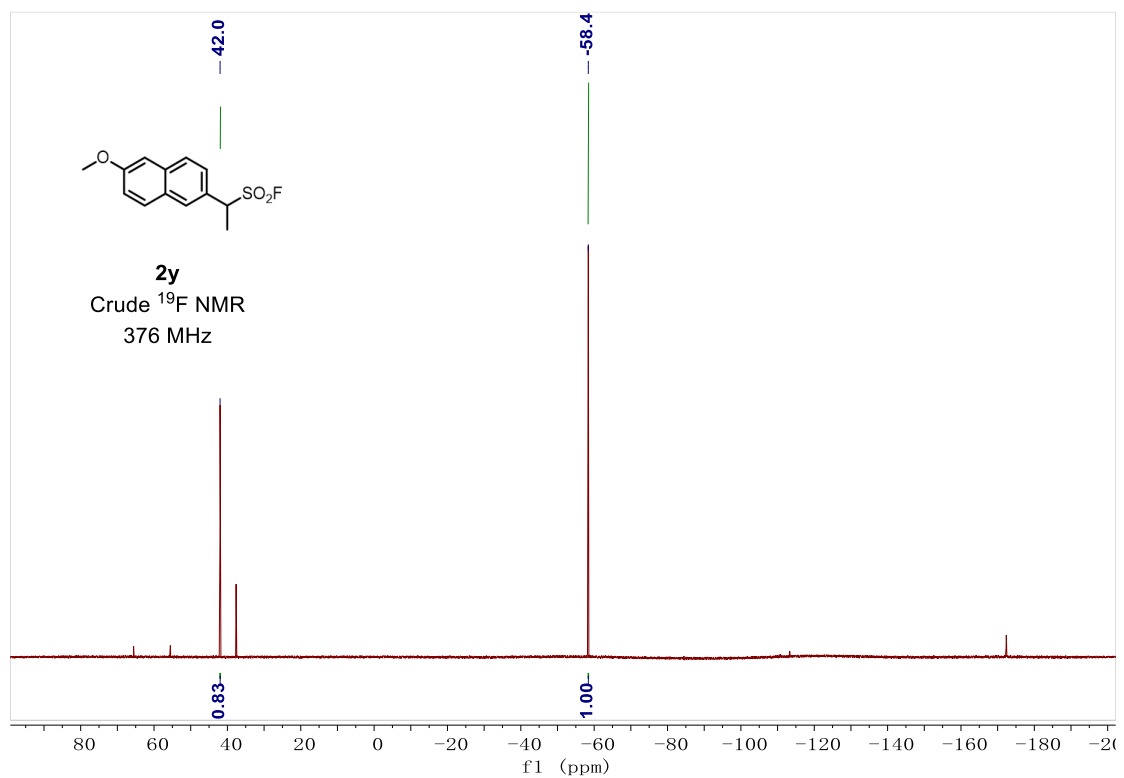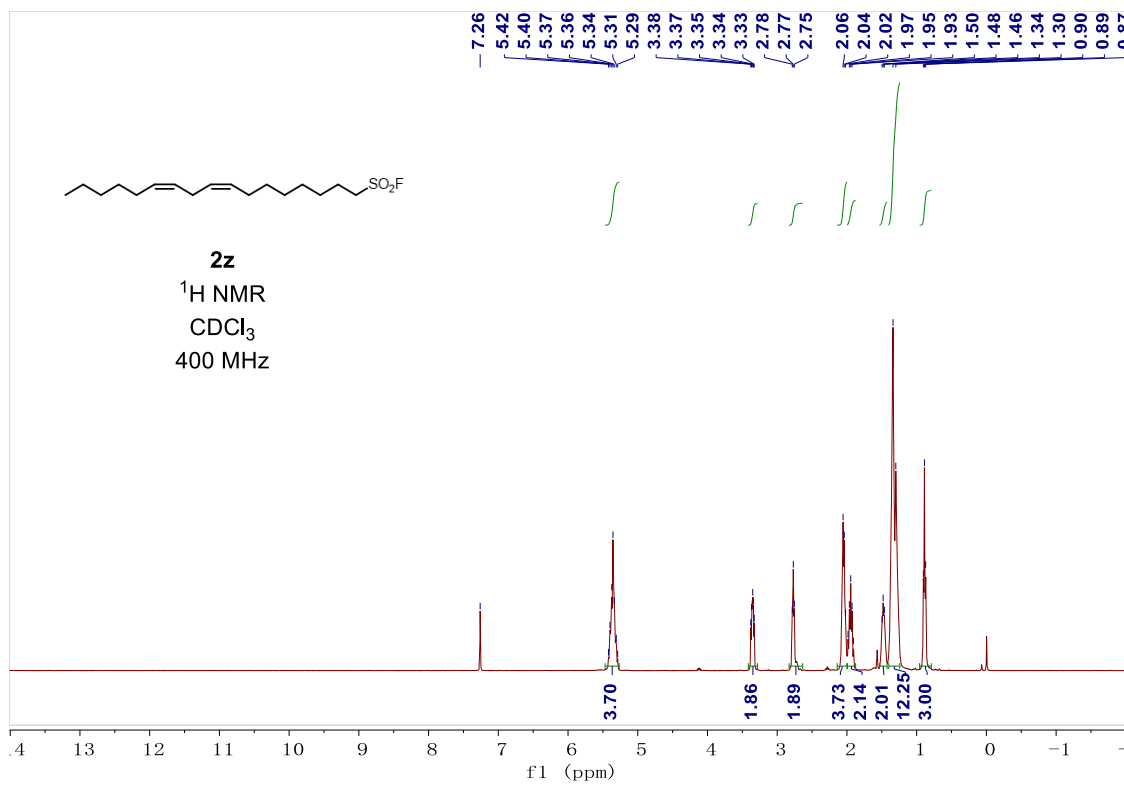

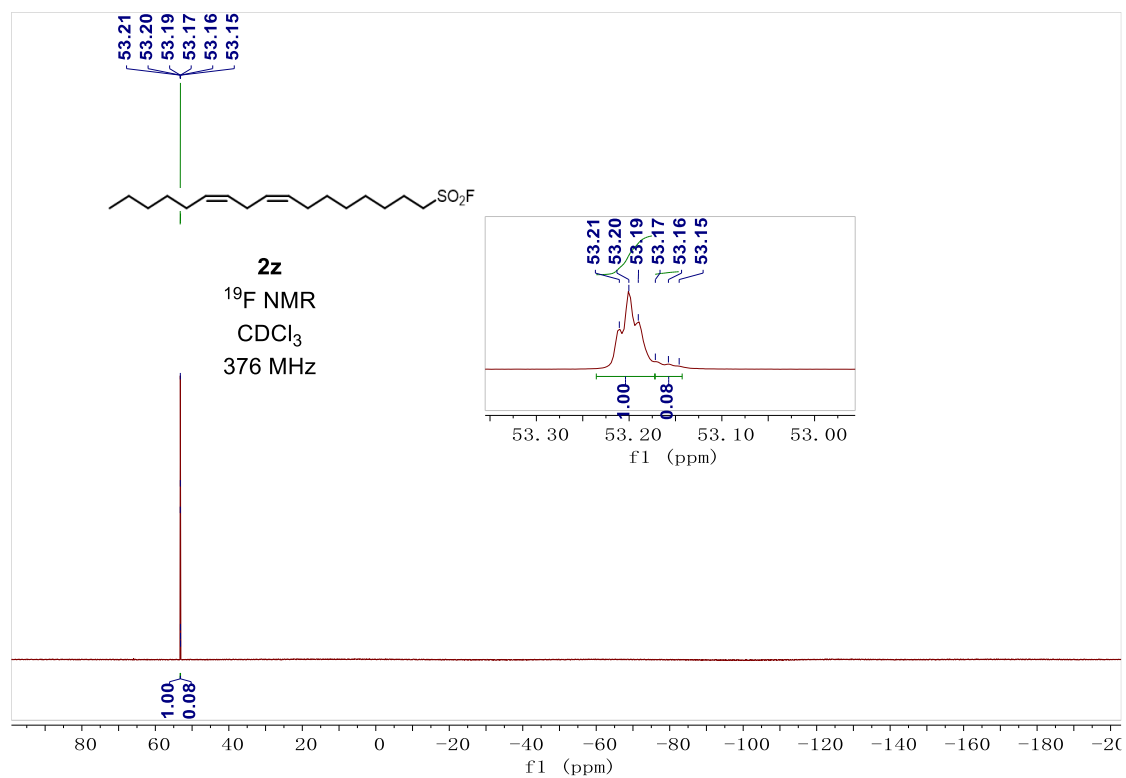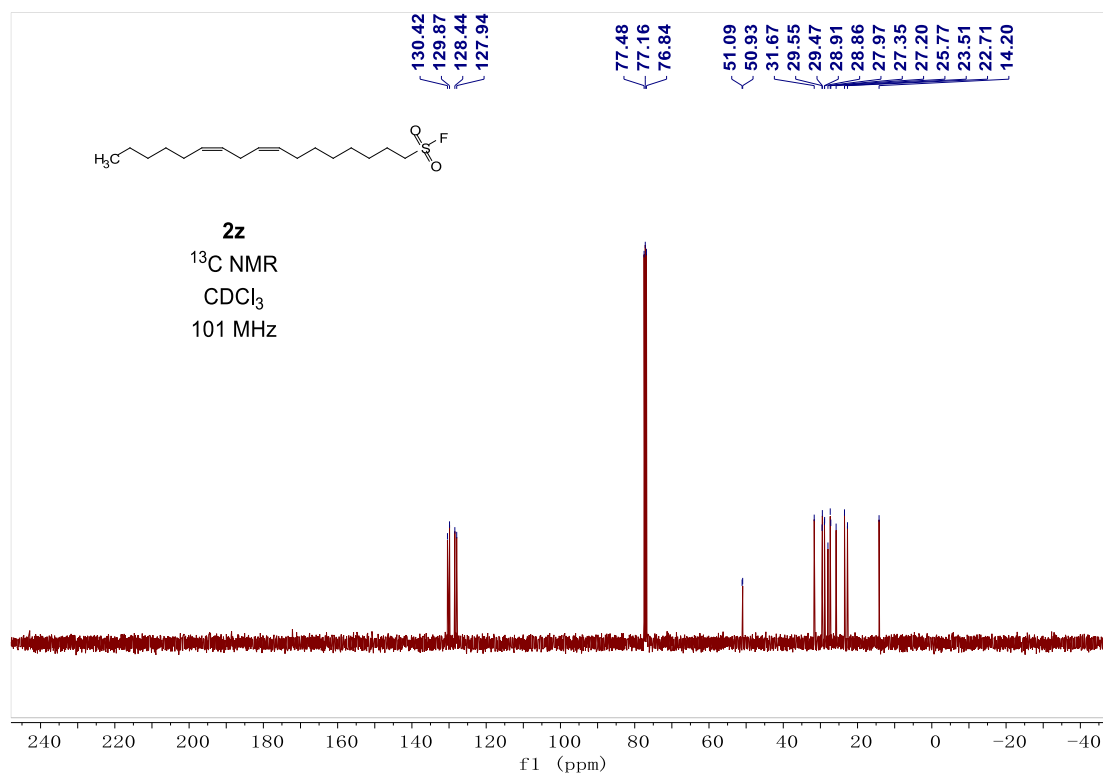

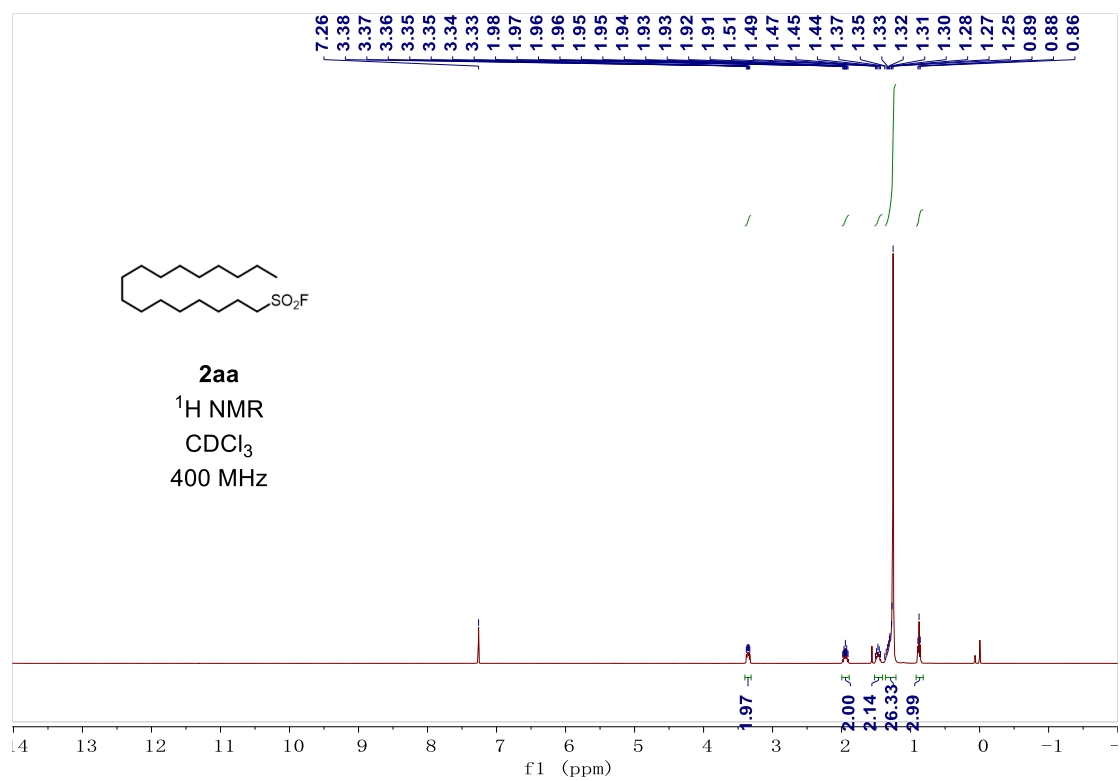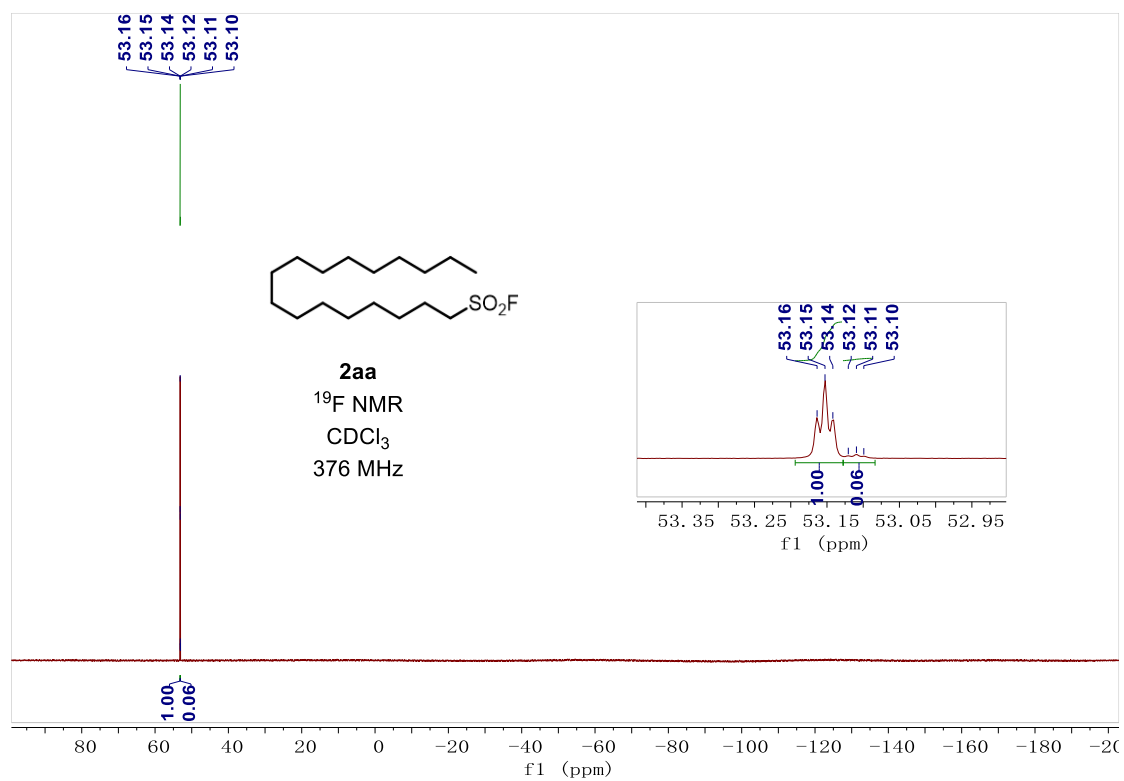

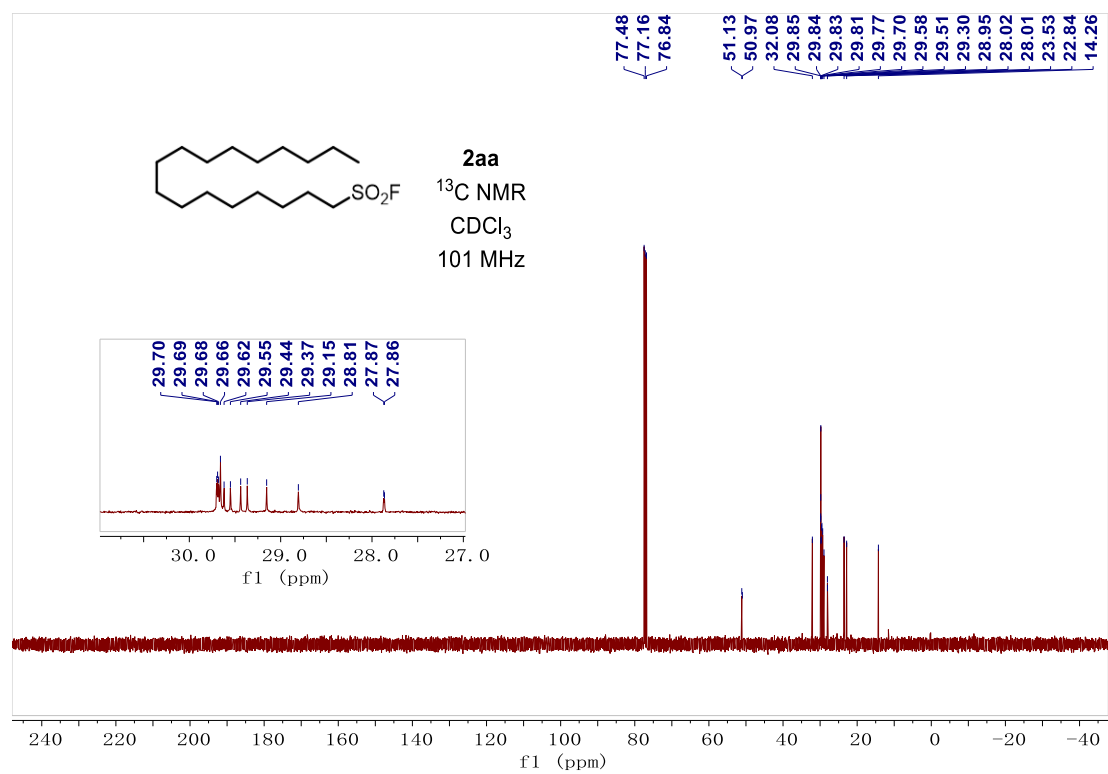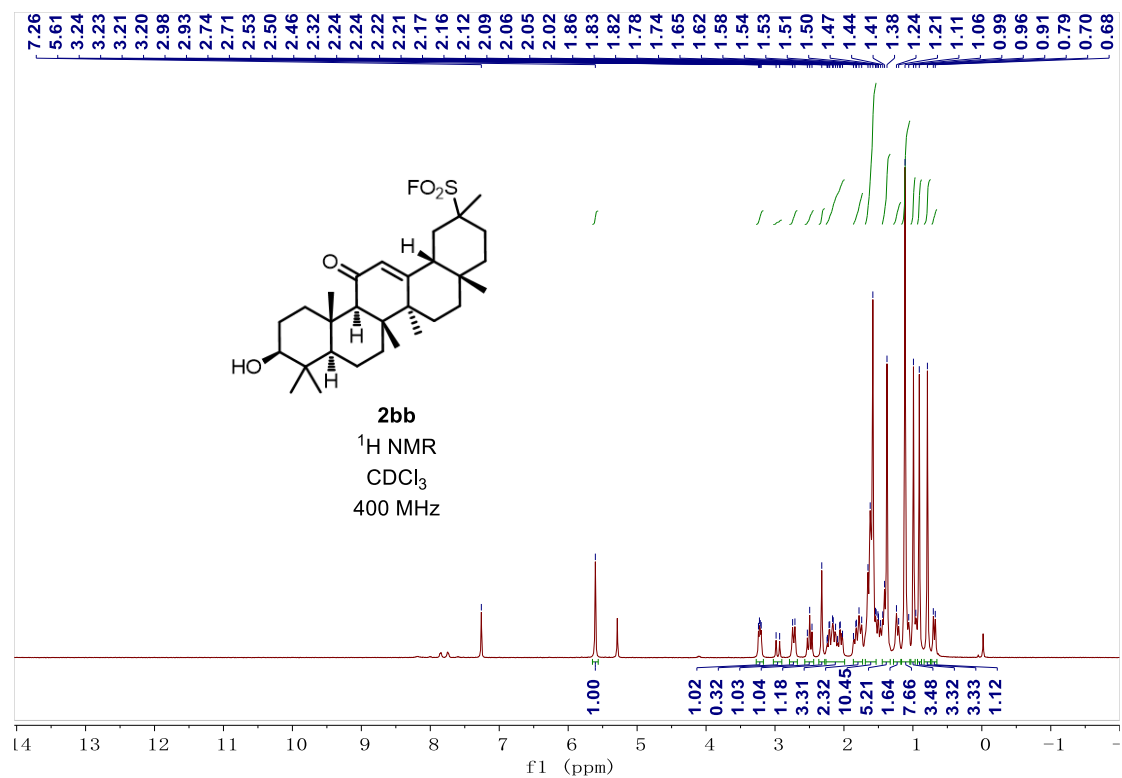

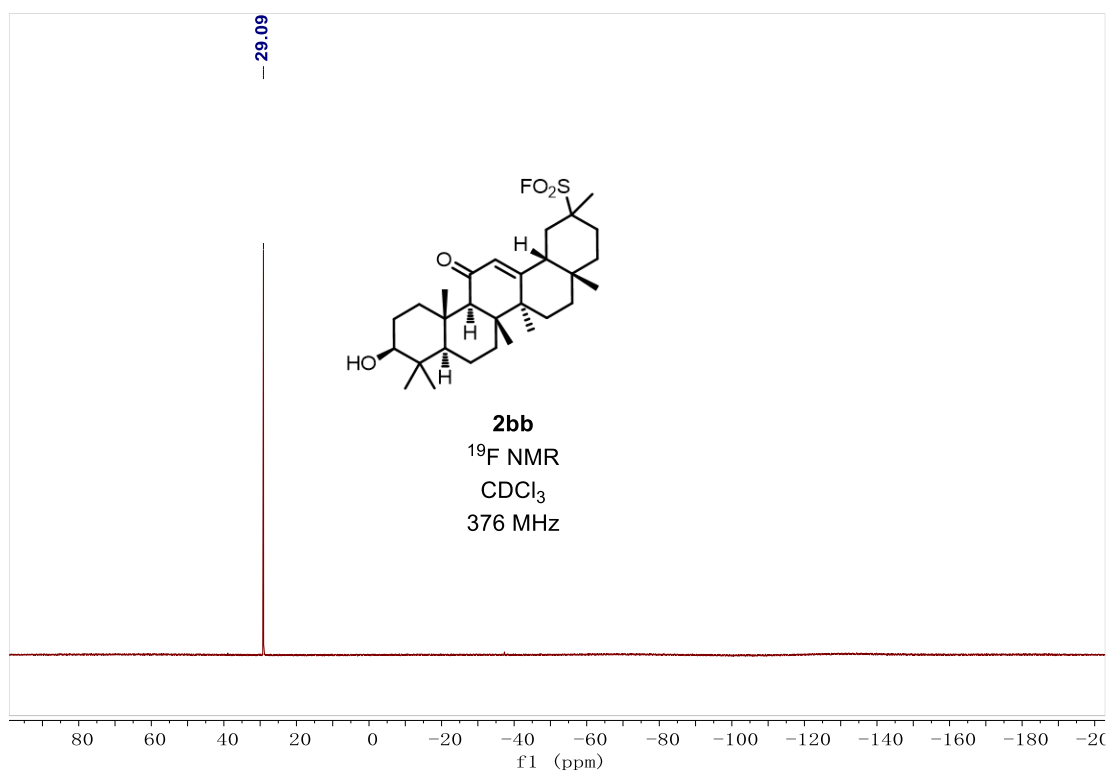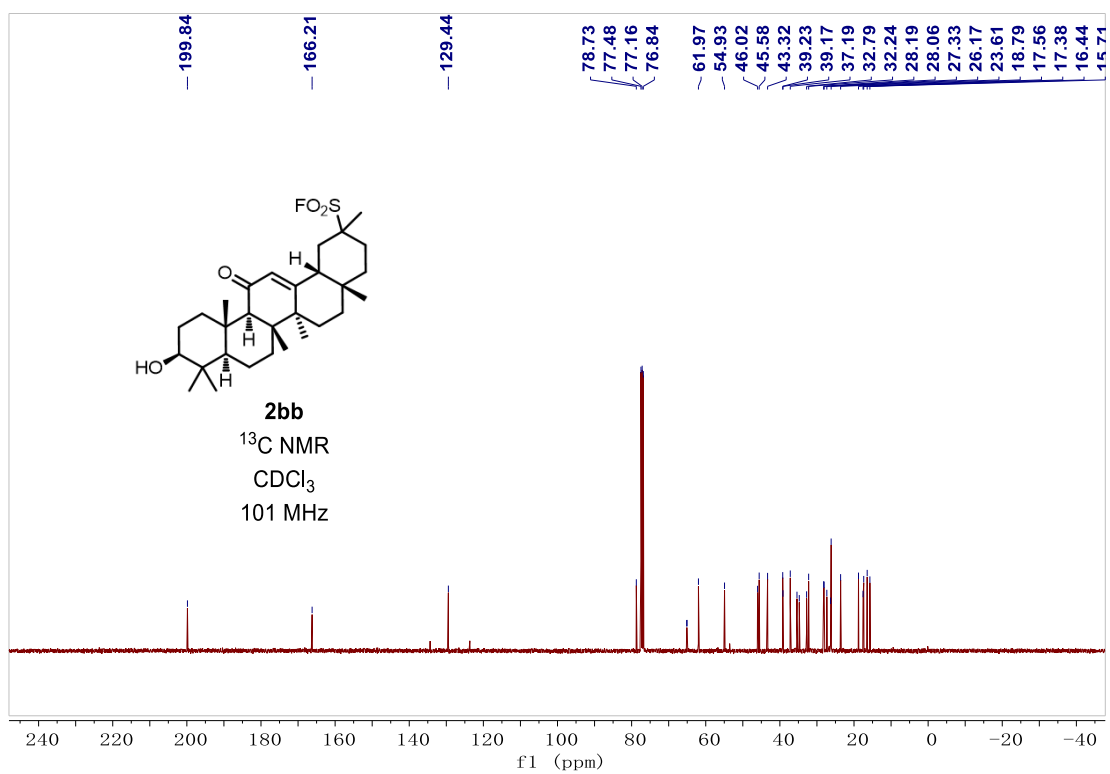

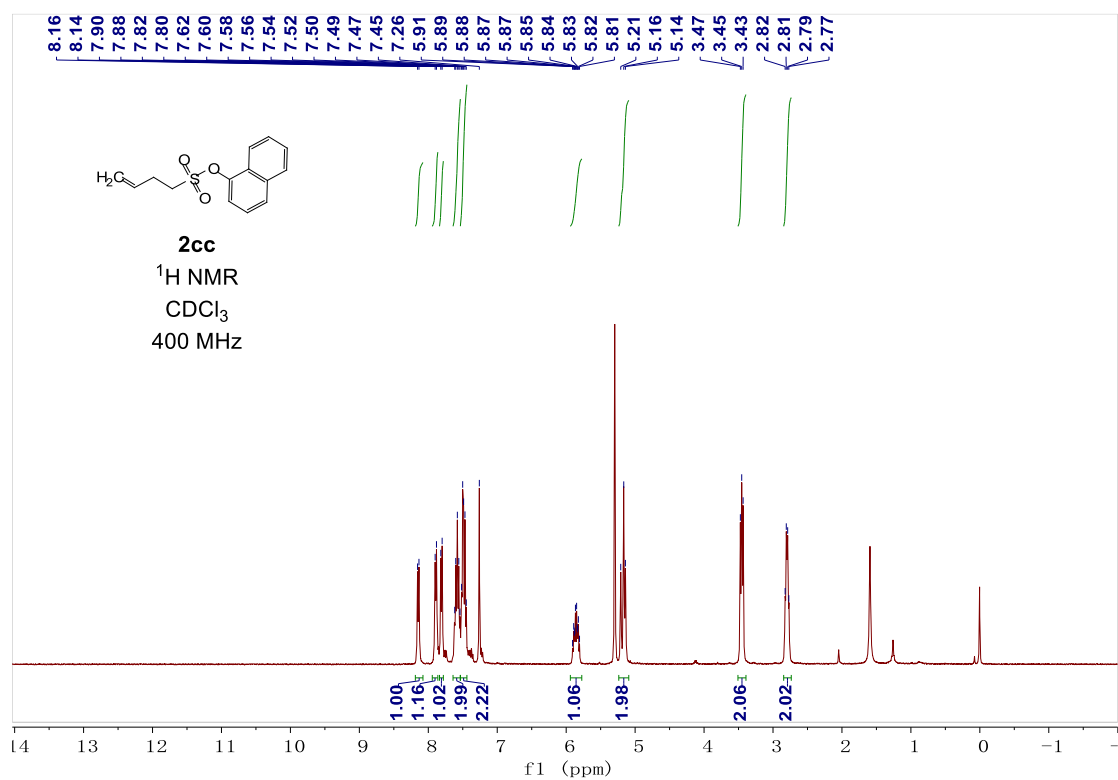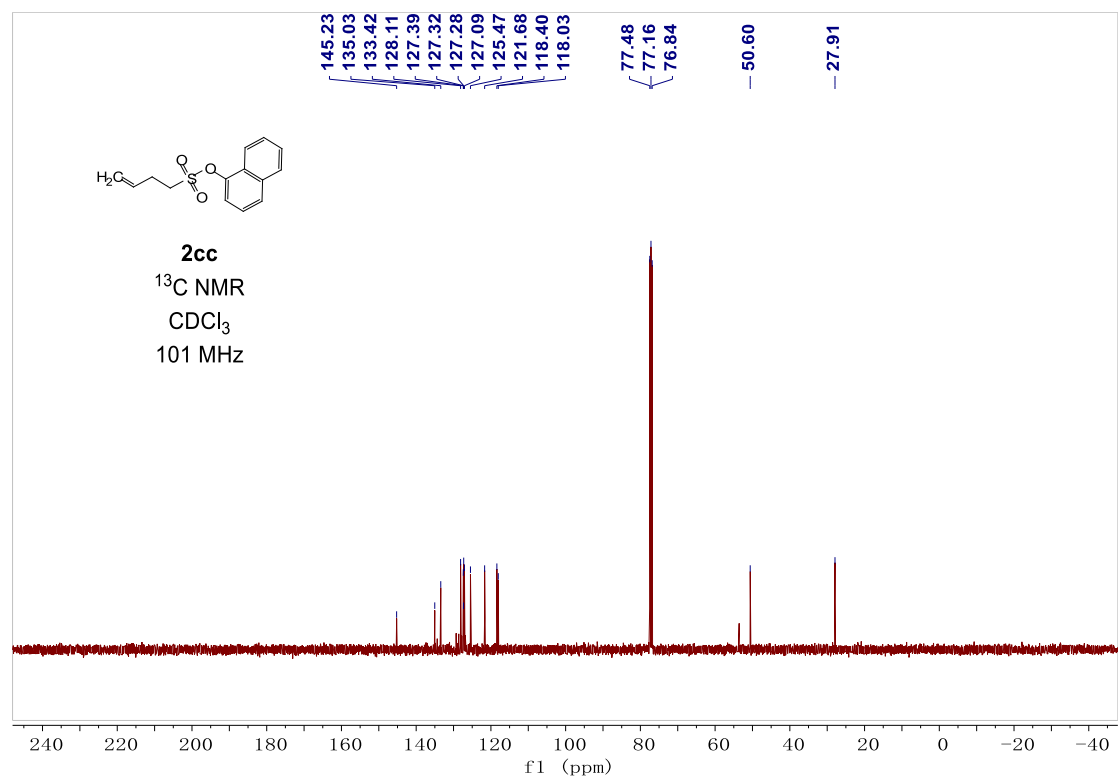



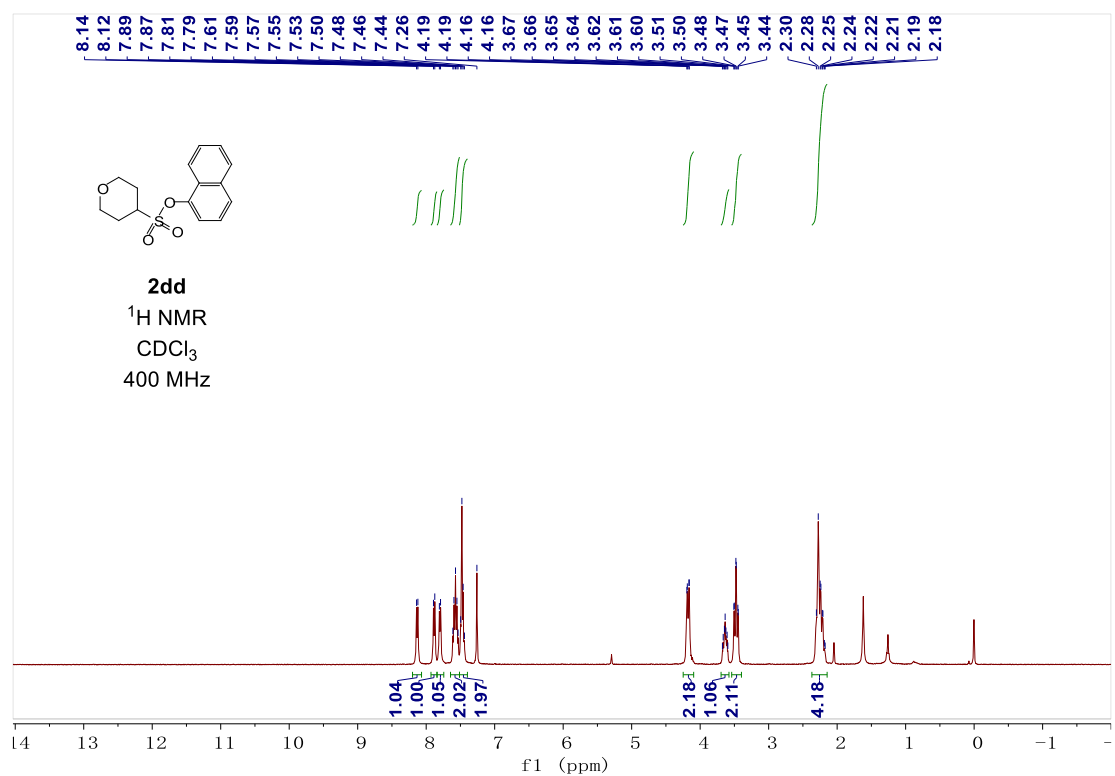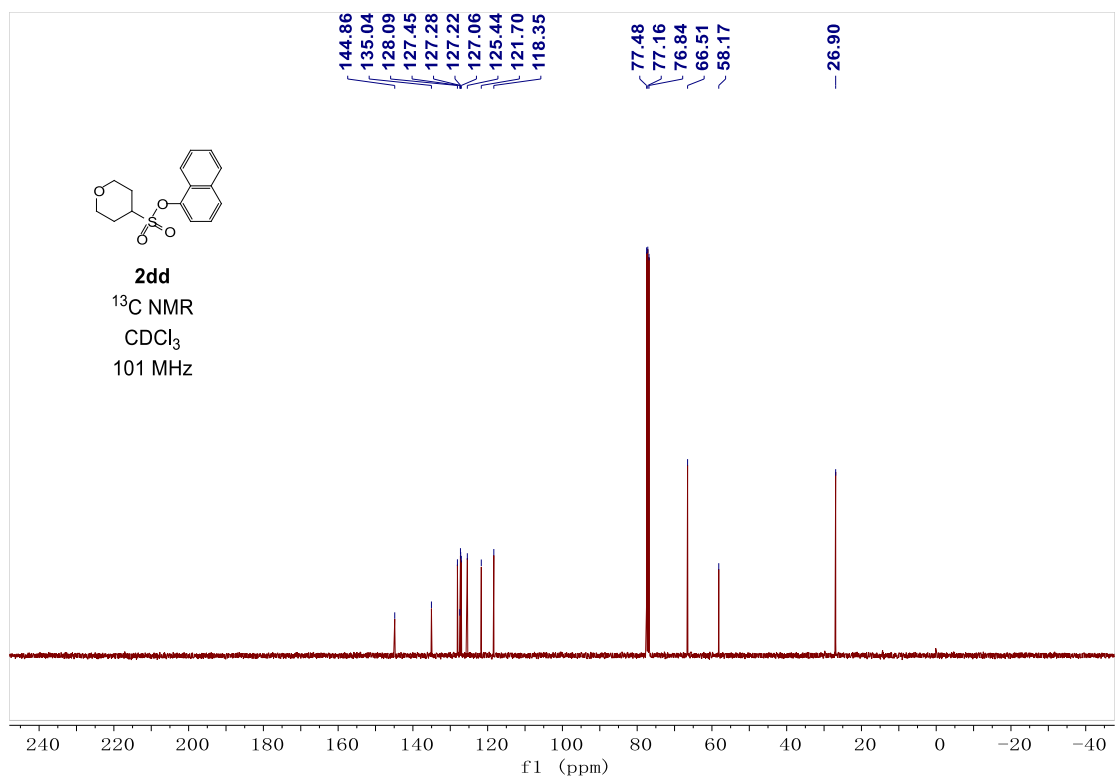

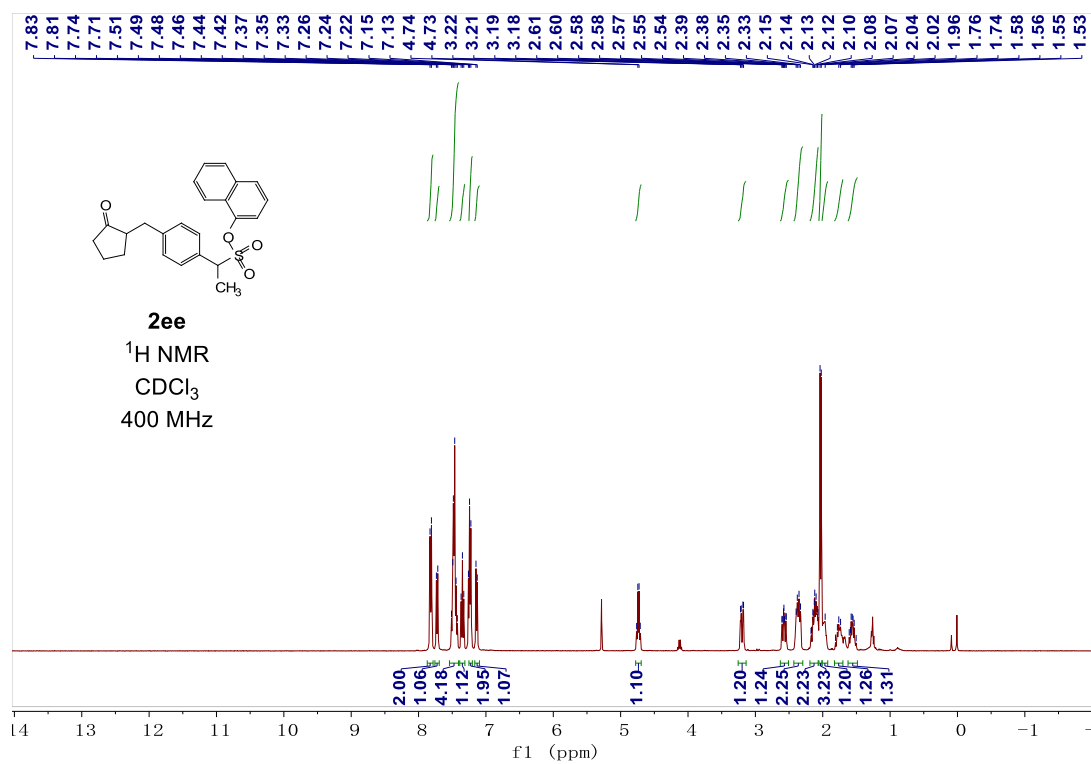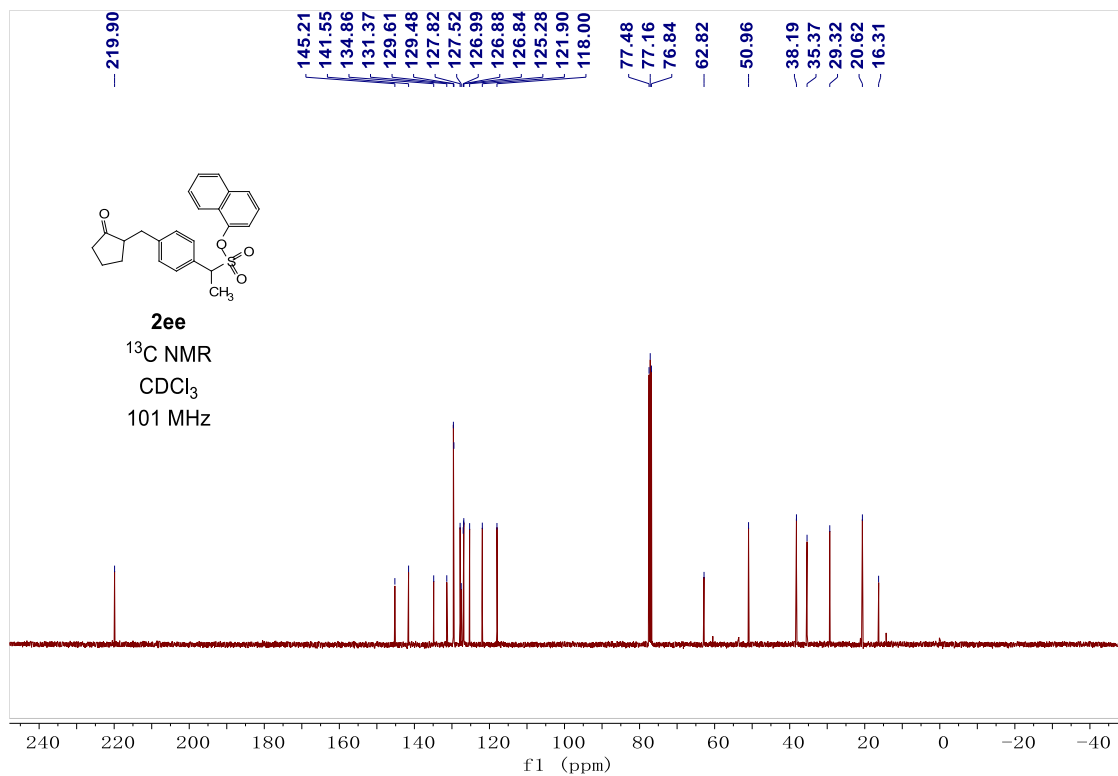

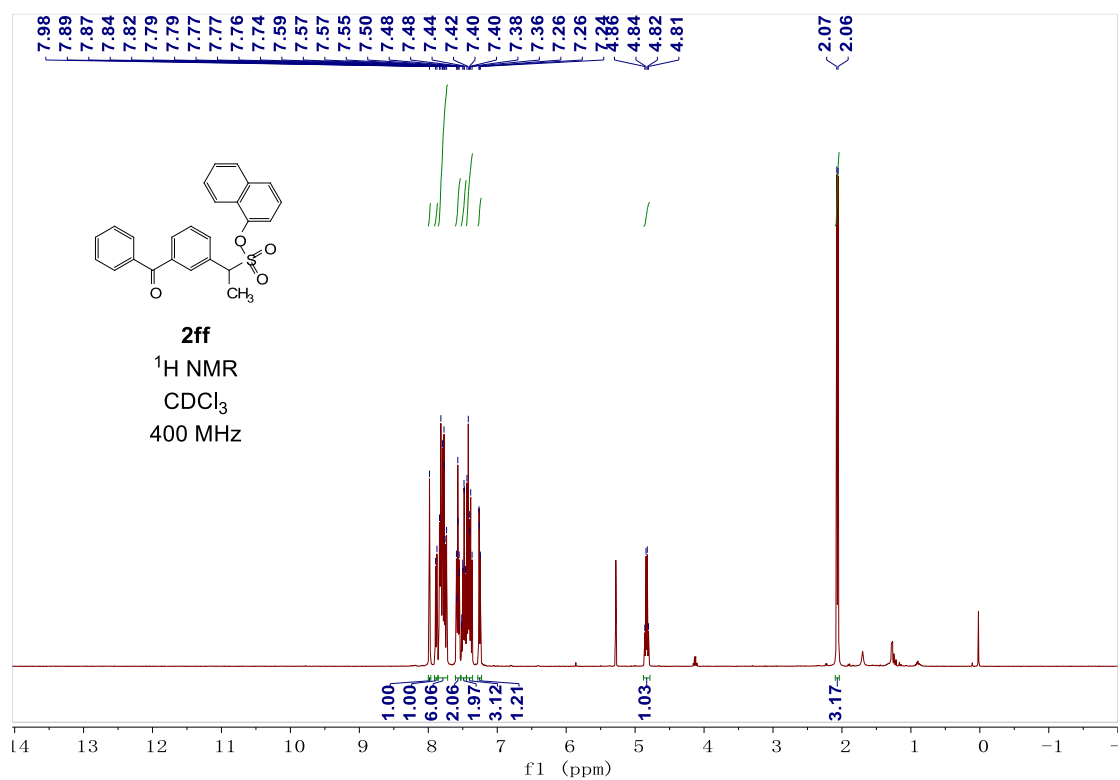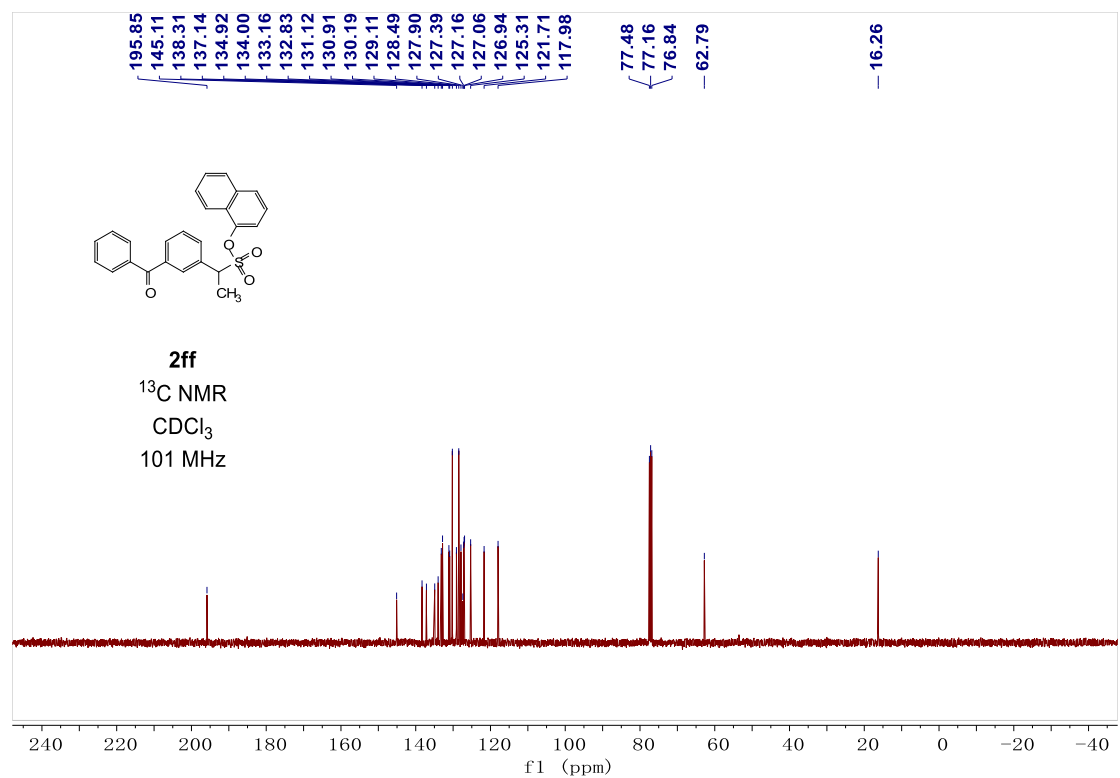

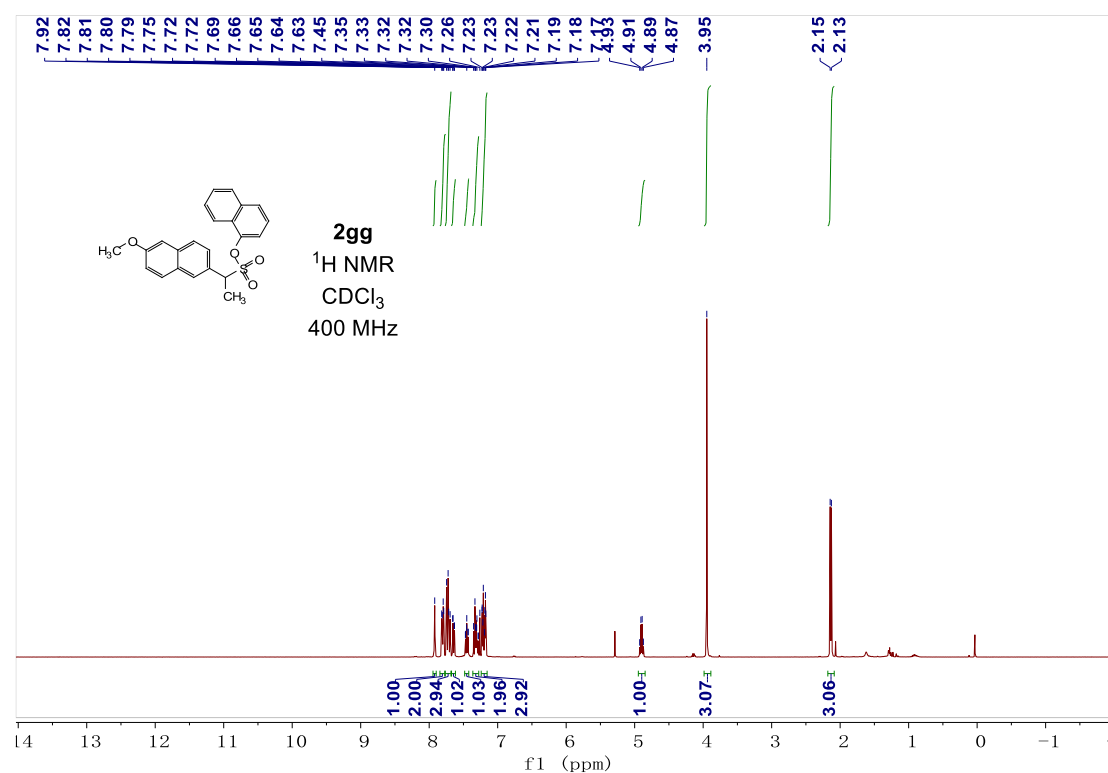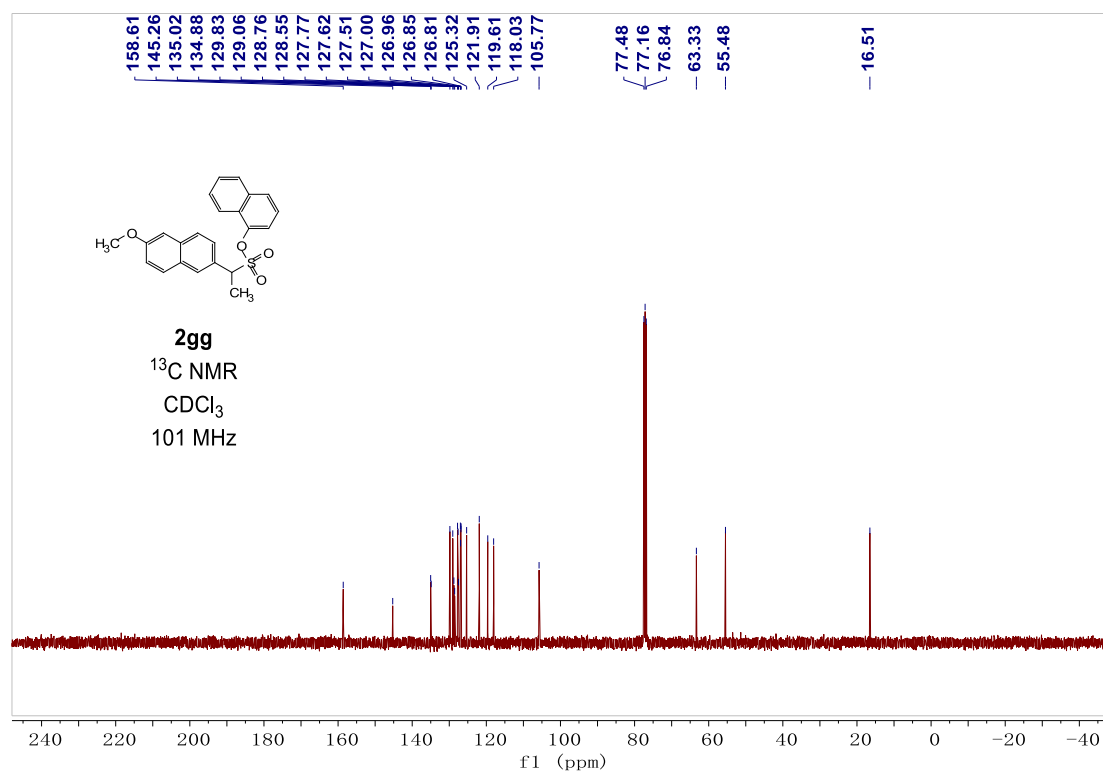

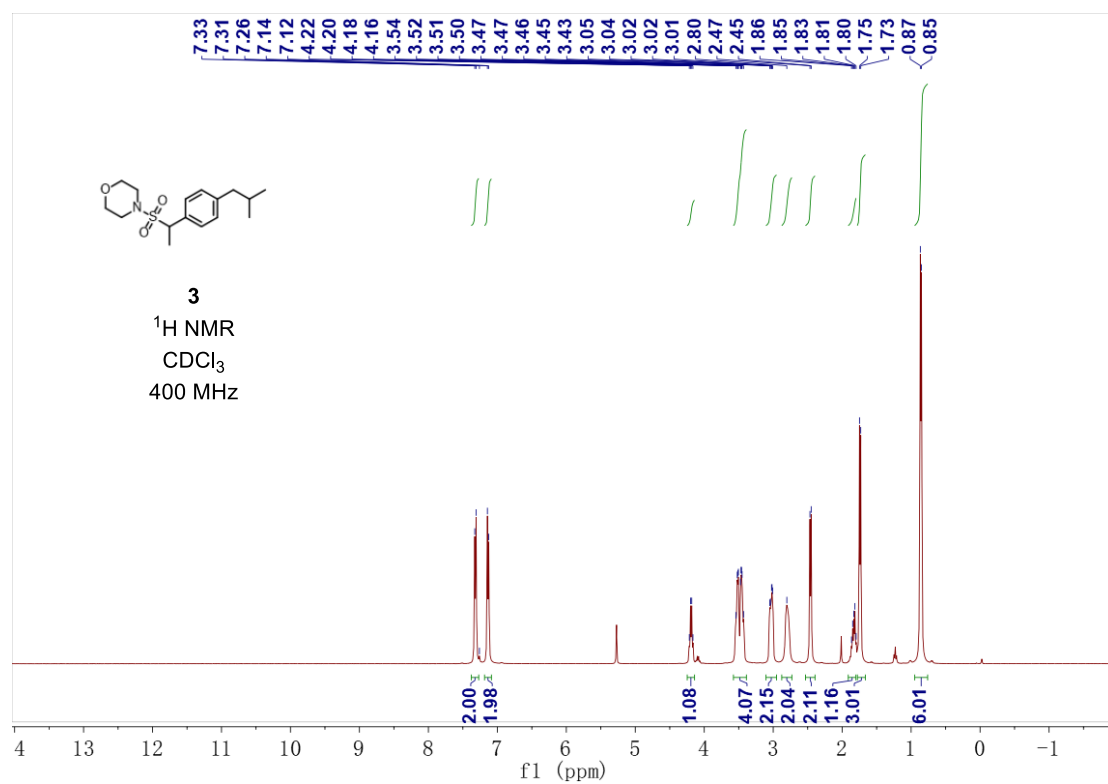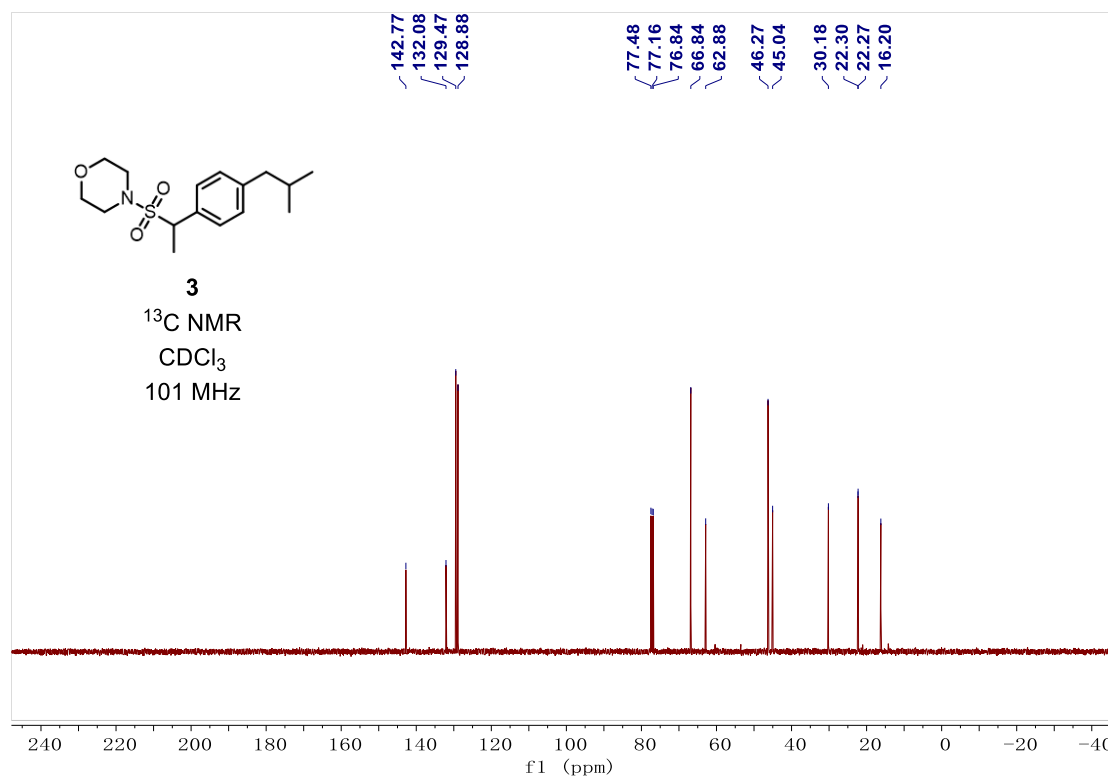

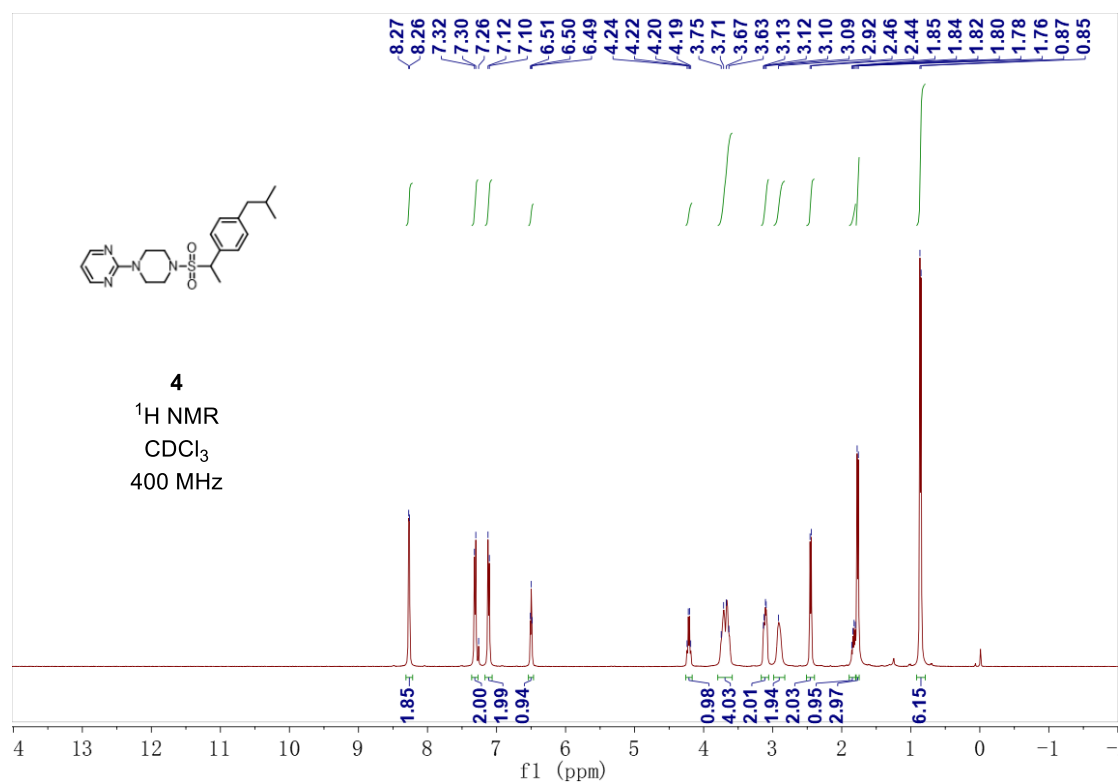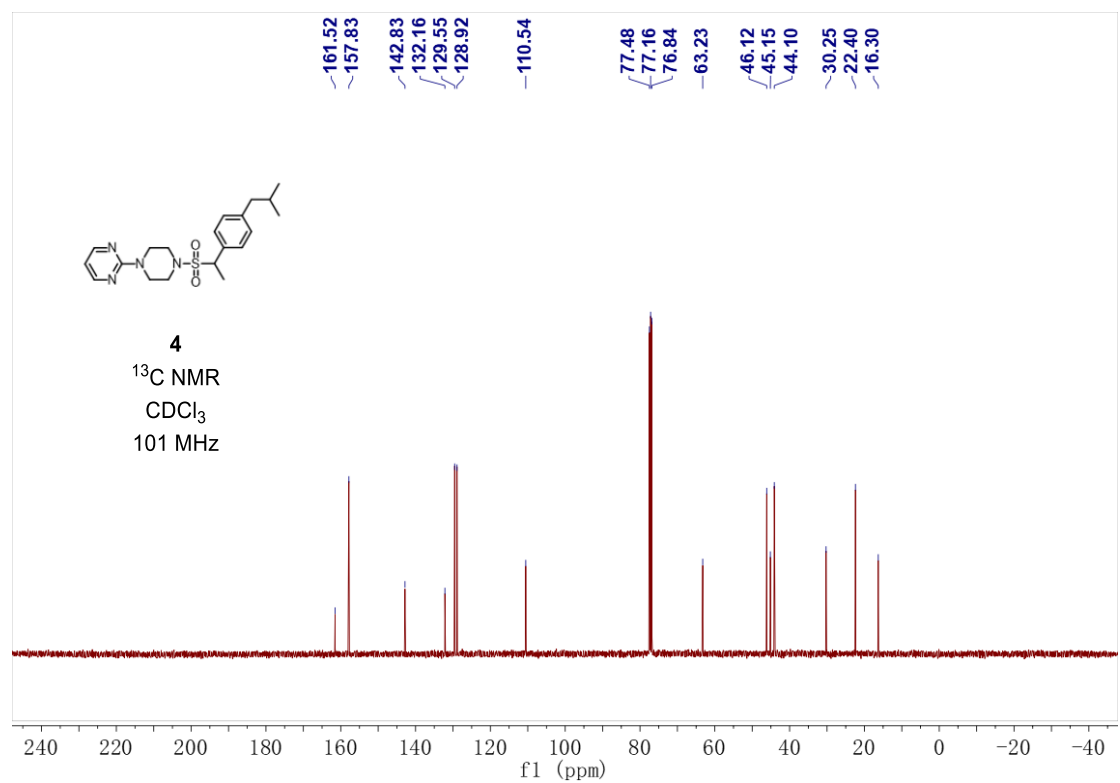

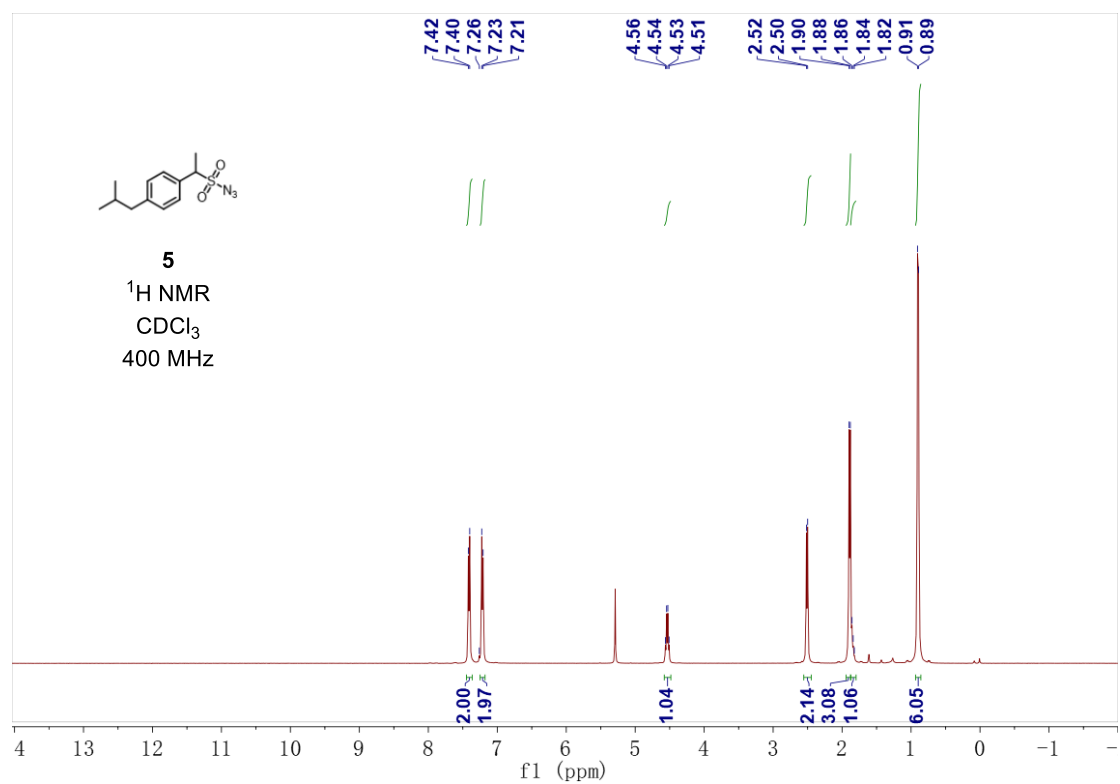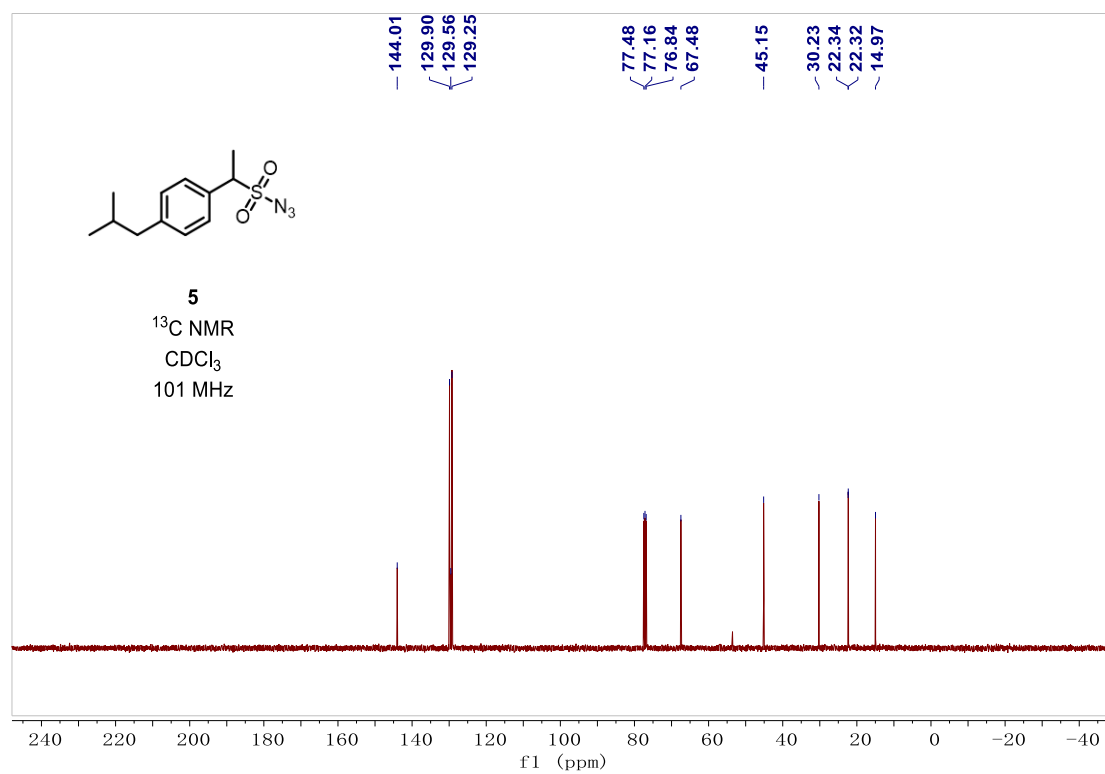

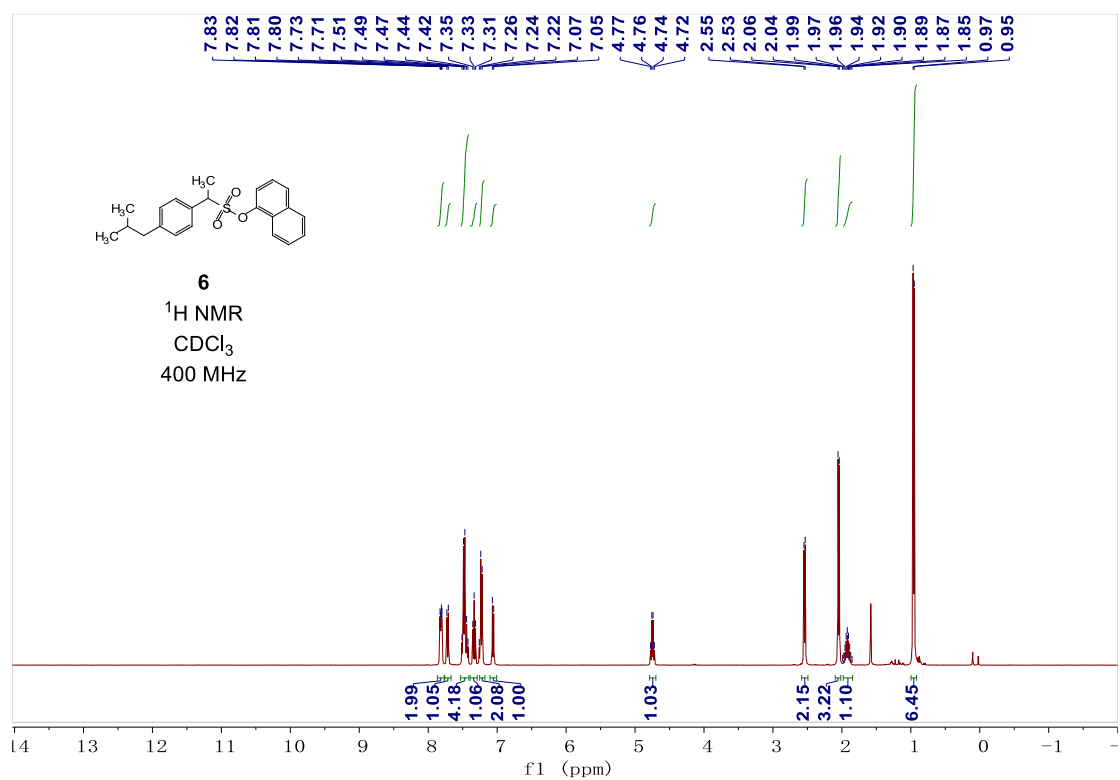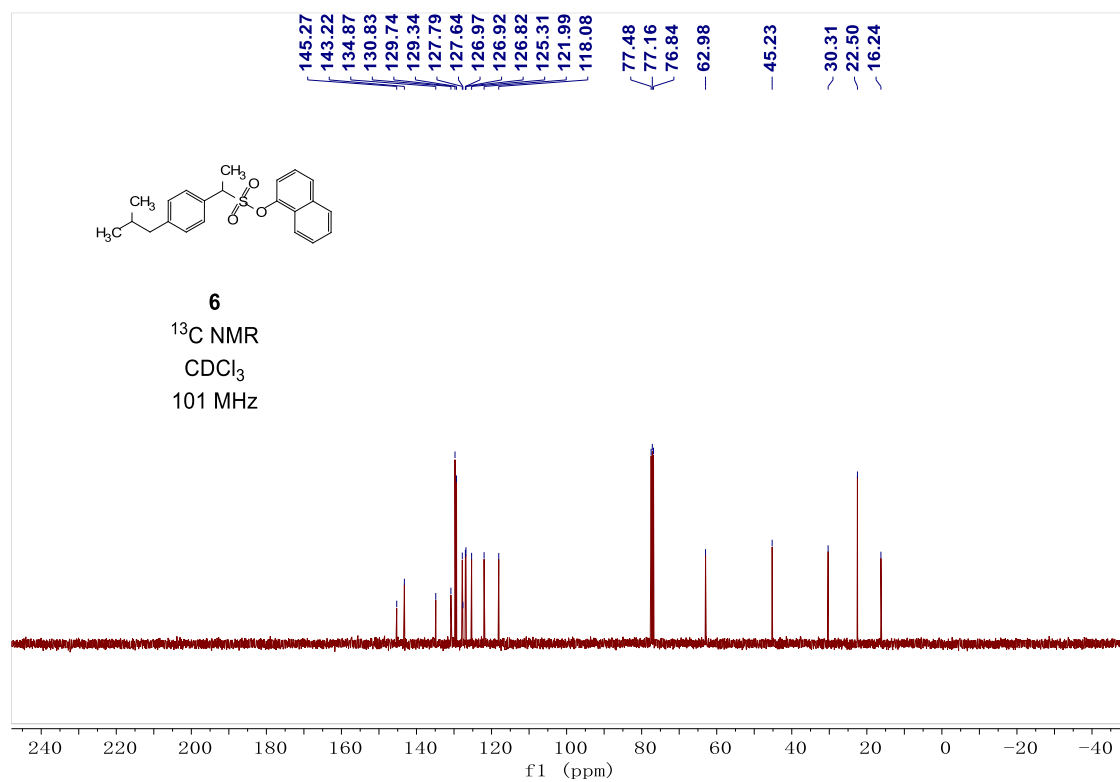



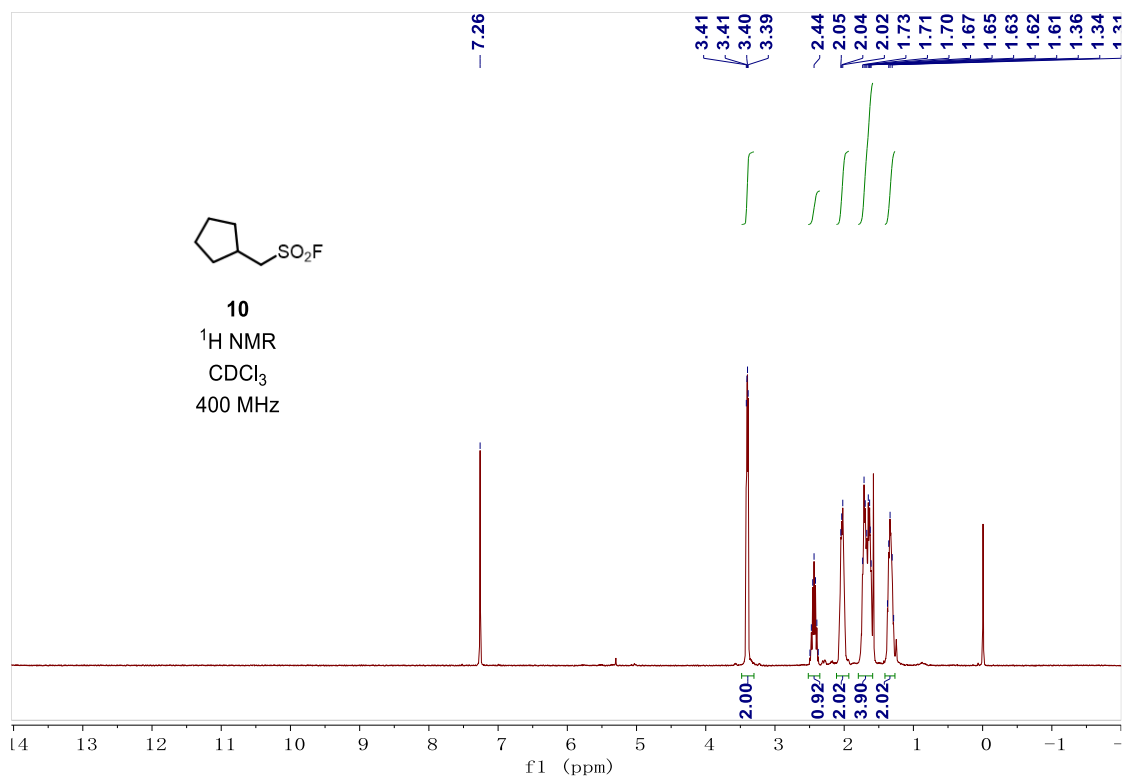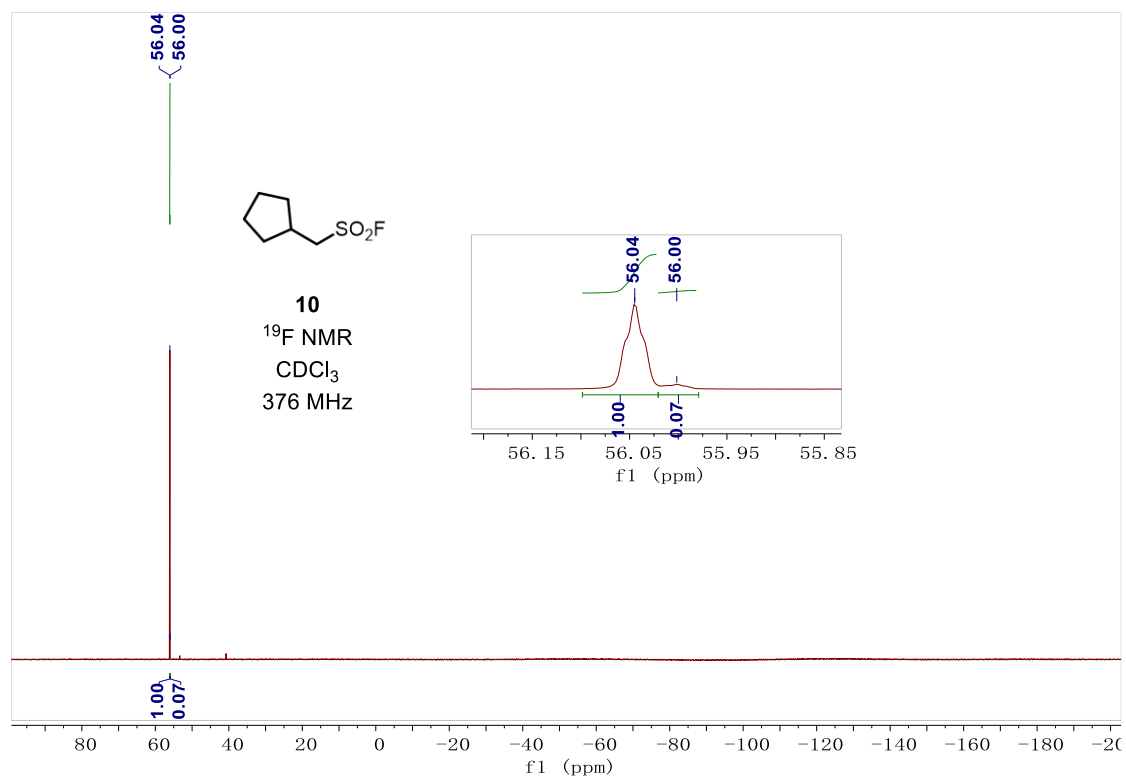

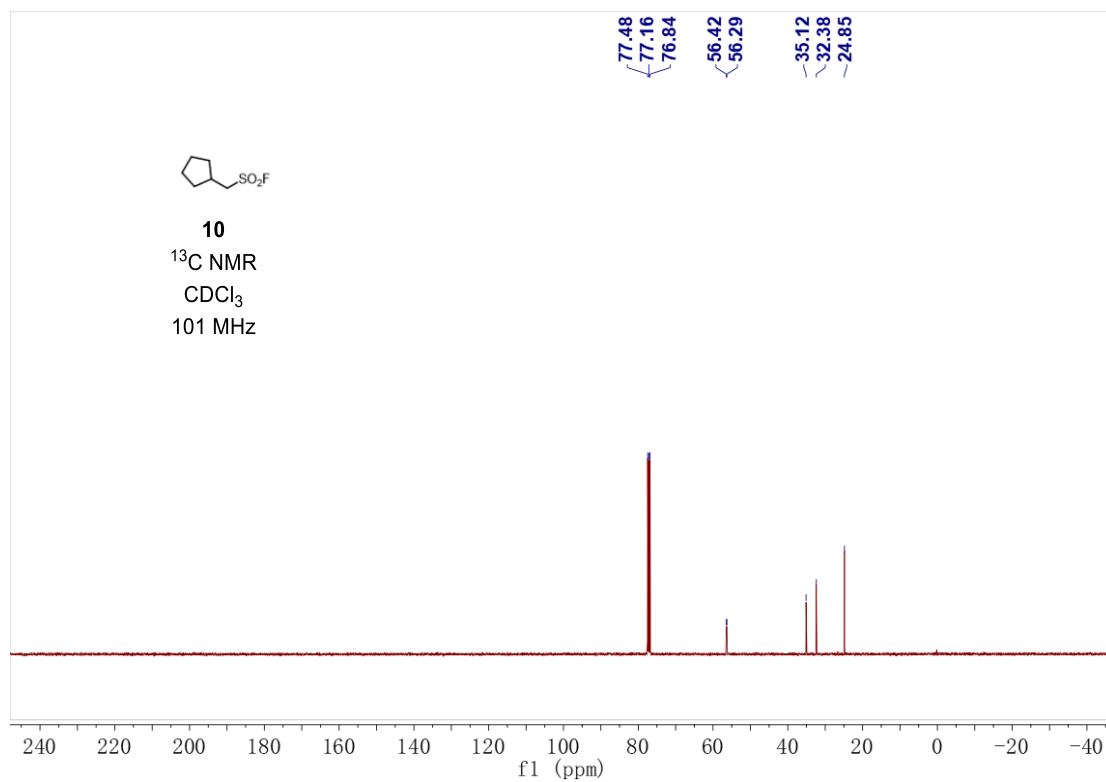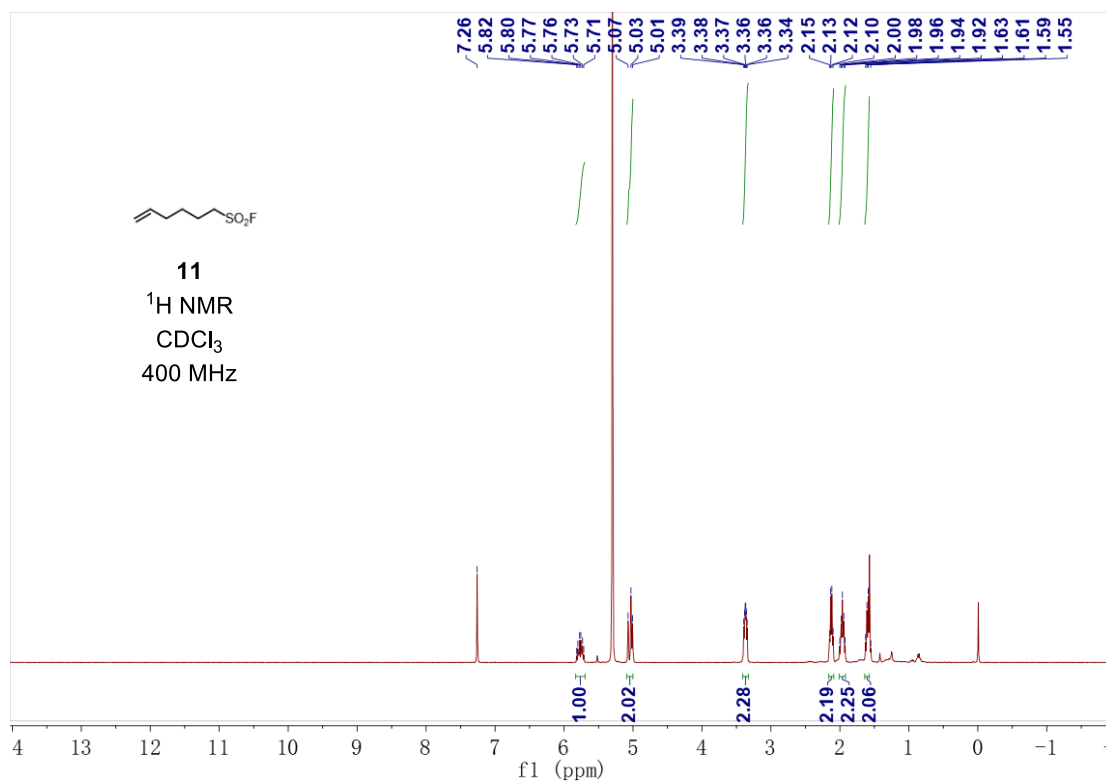

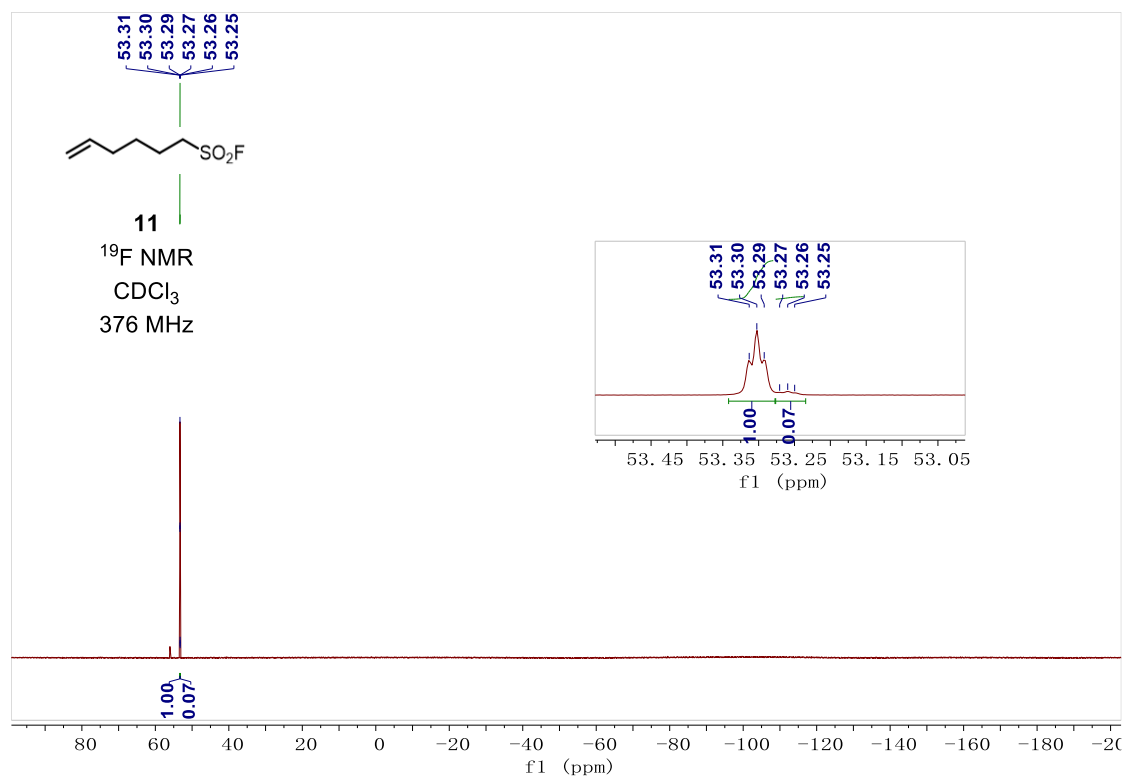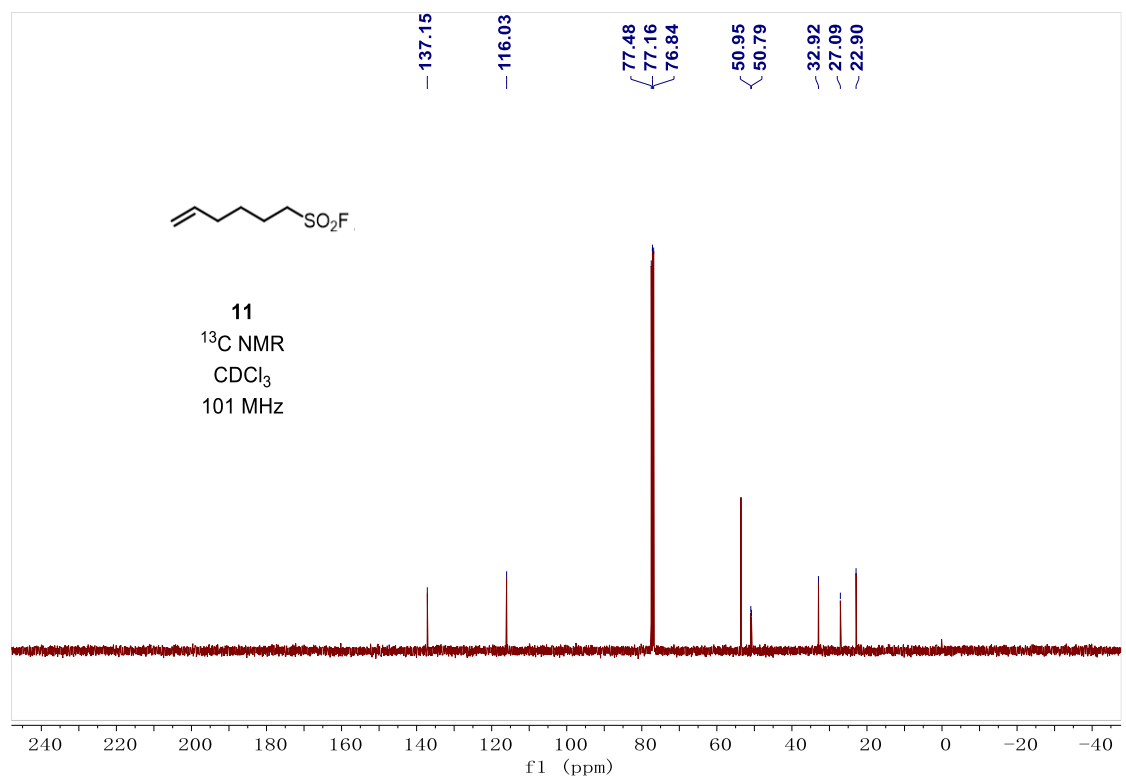

## XI. Single crystal structure data of 2u

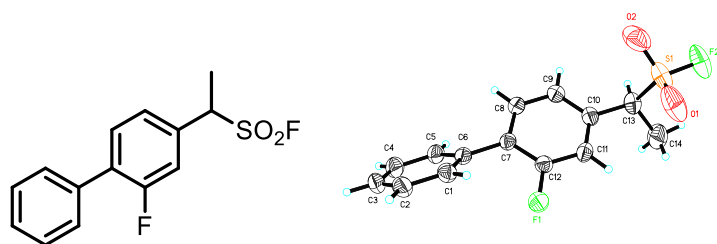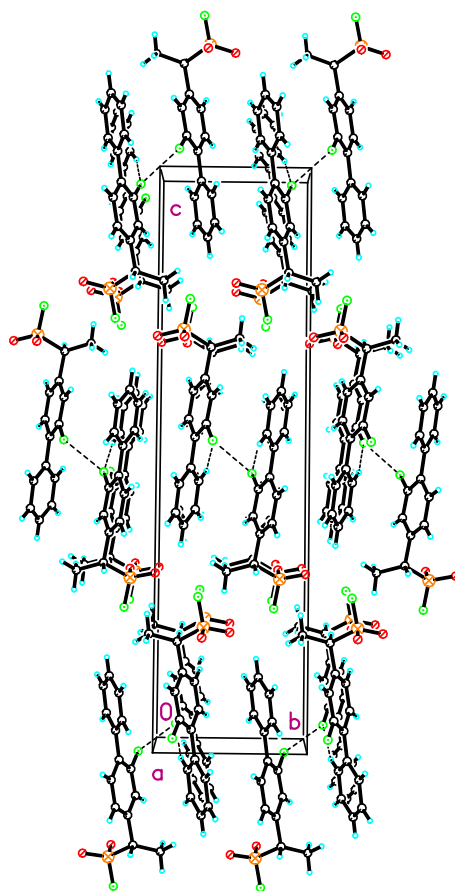

**Table S9.** Crystal data and structure refinement for mo\_d8v21634\_0m.

|                                   |                                                                 |                 |
|-----------------------------------|-----------------------------------------------------------------|-----------------|
| Identification code               | mo_d8v21634_0m                                                  |                 |
| Empirical formula                 | C <sub>14</sub> H <sub>12</sub> F <sub>2</sub> O <sub>2</sub> S |                 |
| Formula weight                    | 282.30                                                          |                 |
| Temperature                       | 293(2) K                                                        |                 |
| Wavelength                        | 0.71073 Å                                                       |                 |
| Crystal system                    | Monoclinic                                                      |                 |
| Space group                       | P 21/n                                                          |                 |
| Unit cell dimensions              | a = 6.1569(6) Å                                                 | a = 90°.        |
|                                   | b = 7.4390(7) Å                                                 | b = 94.592(3)°. |
|                                   | c = 28.410(2) Å                                                 | g = 90°.        |
| Volume                            | 1297.1(2) Å <sup>3</sup>                                        |                 |
| Z                                 | 4                                                               |                 |
| Density (calculated)              | 1.446 Mg/m <sup>3</sup>                                         |                 |
| Absorption coefficient            | 0.268 mm <sup>-1</sup>                                          |                 |
| F(000)                            | 584                                                             |                 |
| Crystal size                      | 0.200 x 0.150 x 0.110 mm <sup>3</sup>                           |                 |
| Theta range for data collection   | 2.831 to 25.997°.                                               |                 |
| Index ranges                      | -6 ≤ h ≤ 7, -9 ≤ k ≤ 9, -34 ≤ l ≤ 34                            |                 |
| Reflections collected             | 20165                                                           |                 |
| Independent reflections           | 2539 [R(int) = 0.0451]                                          |                 |
| Completeness to theta = 25.242°   | 99.6 %                                                          |                 |
| Absorption correction             | Semi-empirical from equivalents                                 |                 |
| Max. and min. transmission        | 0.7456 and 0.5985                                               |                 |
| Refinement method                 | Full-matrix least-squares on F <sup>2</sup>                     |                 |
| Data / restraints / parameters    | 2539 / 2 / 174                                                  |                 |
| Goodness-of-fit on F <sup>2</sup> | 1.067                                                           |                 |
| Final R indices [I > 2σ(I)]       | R1 = 0.0579, wR2 = 0.1645                                       |                 |
| R indices (all data)              | R1 = 0.0764, wR2 = 0.1815                                       |                 |
| Extinction coefficient            | 0.016(5)                                                        |                 |
| Largest diff. peak and hole       | 0.422 and -0.215 e.Å <sup>-3</sup>                              |                 |

**Table S10.** Atomic coordinates ( $\times 10^4$ ) and equivalent isotropic displacement parameters ( $\text{\AA}^2 \times 10^3$ ) for mo\_d8v21634\_0m. U(eq) is defined as one third of the trace of the orthogonalized  $U^{ij}$  tensor.

|       | x       | y       | z       | U(eq)  |
|-------|---------|---------|---------|--------|
| S(1)  | 5321(2) | 1797(2) | 7118(1) | 97(1)  |
| F(1)  | 6247(2) | 3709(3) | 5279(1) | 74(1)  |
| F(2)  | 5295(5) | 2172(4) | 7632(1) | 136(1) |
| O(1)  | 7434(5) | 1885(6) | 6981(1) | 140(1) |
| O(2)  | 4248(7) | 103(4)  | 7021(1) | 134(1) |
| C(1)  | 3925(5) | 1591(4) | 4549(1) | 60(1)  |
| C(2)  | 3512(6) | 1372(4) | 4068(1) | 71(1)  |
| C(3)  | 1522(6) | 1853(4) | 3849(1) | 78(1)  |
| C(4)  | -44(6)  | 2576(5) | 4110(1) | 76(1)  |
| C(5)  | 338(5)  | 2790(4) | 4590(1) | 61(1)  |
| C(6)  | 2340(4) | 2295(3) | 4819(1) | 51(1)  |
| C(7)  | 2718(4) | 2550(3) | 5338(1) | 50(1)  |
| C(8)  | 1147(4) | 2103(4) | 5643(1) | 57(1)  |
| C(9)  | 1452(5) | 2390(4) | 6123(1) | 61(1)  |
| C(10) | 3355(4) | 3158(4) | 6320(1) | 57(1)  |
| C(11) | 4961(4) | 3608(4) | 6027(1) | 58(1)  |
| C(12) | 4634(4) | 3279(3) | 5551(1) | 52(1)  |
| C(13) | 3634(5) | 3520(4) | 6848(1) | 71(1)  |
| C(14) | 4494(8) | 5350(6) | 6988(1) | 106(1) |

**Table S11.** Bond lengths [Å] and angles [°] for mo\_d8v21634\_0m.

---

|                |            |
|----------------|------------|
| S(1)-O(1)      | 1.390(3)   |
| S(1)-O(2)      | 1.439(4)   |
| S(1)-F(2)      | 1.486(2)   |
| S(1)-C(13)     | 1.784(3)   |
| F(1)-C(12)     | 1.346(3)   |
| C(1)-C(2)      | 1.379(4)   |
| C(1)-C(6)      | 1.391(4)   |
| C(1)-H(1)      | 0.9300     |
| C(2)-C(3)      | 1.377(5)   |
| C(2)-H(2)      | 0.9300     |
| C(3)-C(4)      | 1.372(5)   |
| C(3)-H(3)      | 0.9300     |
| C(4)-C(5)      | 1.376(4)   |
| C(4)-H(4)      | 0.9300     |
| C(5)-C(6)      | 1.396(4)   |
| C(5)-H(5)      | 0.9300     |
| C(6)-C(7)      | 1.486(3)   |
| C(7)-C(8)      | 1.390(4)   |
| C(7)-C(12)     | 1.393(3)   |
| C(8)-C(9)      | 1.380(4)   |
| C(8)-H(8)      | 0.9300     |
| C(9)-C(10)     | 1.380(4)   |
| C(9)-H(9)      | 0.9300     |
| C(10)-C(11)    | 1.384(4)   |
| C(10)-C(13)    | 1.522(4)   |
| C(11)-C(12)    | 1.372(3)   |
| C(11)-H(11)    | 0.9300     |
| C(13)-C(14)    | 1.502(5)   |
| C(13)-H(13)    | 0.9800     |
| C(14)-H(14A)   | 0.9600     |
| C(14)-H(14B)   | 0.9600     |
| C(14)-H(14C)   | 0.9600     |
| O(1)-S(1)-O(2) | 114.4(2)   |
| O(1)-S(1)-F(2) | 110.52(19) |
| O(2)-S(1)-F(2) | 108.1(2)   |

|                   |            |
|-------------------|------------|
| O(1)-S(1)-C(13)   | 111.81(19) |
| O(2)-S(1)-C(13)   | 107.74(19) |
| F(2)-S(1)-C(13)   | 103.60(15) |
| C(2)-C(1)-C(6)    | 120.6(3)   |
| C(2)-C(1)-H(1)    | 119.7      |
| C(6)-C(1)-H(1)    | 119.7      |
| C(3)-C(2)-C(1)    | 120.3(3)   |
| C(3)-C(2)-H(2)    | 119.9      |
| C(1)-C(2)-H(2)    | 119.9      |
| C(4)-C(3)-C(2)    | 119.8(3)   |
| C(4)-C(3)-H(3)    | 120.1      |
| C(2)-C(3)-H(3)    | 120.1      |
| C(3)-C(4)-C(5)    | 120.6(3)   |
| C(3)-C(4)-H(4)    | 119.7      |
| C(5)-C(4)-H(4)    | 119.7      |
| C(4)-C(5)-C(6)    | 120.4(3)   |
| C(4)-C(5)-H(5)    | 119.8      |
| C(6)-C(5)-H(5)    | 119.8      |
| C(1)-C(6)-C(5)    | 118.3(2)   |
| C(1)-C(6)-C(7)    | 122.3(2)   |
| C(5)-C(6)-C(7)    | 119.4(2)   |
| C(8)-C(7)-C(12)   | 115.4(2)   |
| C(8)-C(7)-C(6)    | 121.8(2)   |
| C(12)-C(7)-C(6)   | 122.8(2)   |
| C(9)-C(8)-C(7)    | 122.2(2)   |
| C(9)-C(8)-H(8)    | 118.9      |
| C(7)-C(8)-H(8)    | 118.9      |
| C(10)-C(9)-C(8)   | 120.6(3)   |
| C(10)-C(9)-H(9)   | 119.7      |
| C(8)-C(9)-H(9)    | 119.7      |
| C(9)-C(10)-C(11)  | 118.8(2)   |
| C(9)-C(10)-C(13)  | 119.8(2)   |
| C(11)-C(10)-C(13) | 121.4(2)   |
| C(12)-C(11)-C(10) | 119.6(2)   |
| C(12)-C(11)-H(11) | 120.2      |
| C(10)-C(11)-H(11) | 120.2      |
| F(1)-C(12)-C(11)  | 117.9(2)   |
| F(1)-C(12)-C(7)   | 118.7(2)   |



|                     |          |
|---------------------|----------|
| C(11)-C(12)-C(7)    | 123.4(2) |
| C(14)-C(13)-C(10)   | 115.5(3) |
| C(14)-C(13)-S(1)    | 110.9(2) |
| C(10)-C(13)-S(1)    | 108.2(2) |
| C(14)-C(13)-H(13)   | 107.3    |
| C(10)-C(13)-H(13)   | 107.3    |
| S(1)-C(13)-H(13)    | 107.3    |
| C(13)-C(14)-H(14A)  | 109.5    |
| C(13)-C(14)-H(14B)  | 109.5    |
| H(14A)-C(14)-H(14B) | 109.5    |
| C(13)-C(14)-H(14C)  | 109.5    |
| H(14A)-C(14)-H(14C) | 109.5    |
| H(14B)-C(14)-H(14C) | 109.5    |

---

Symmetry transformations used to generate equivalent atoms:

**Table S12.** Anisotropic displacement parameters ( $\text{\AA}^2 \times 10^3$ ) for mo\_d8v21634\_0m. The anisotropic displacement factor exponent takes the form:  $-2p^2 [h^2 a^{*2} U^{11} + \dots + 2 h k a^* b^* U^{12}]$

|       | U <sup>11</sup> | U <sup>22</sup> | U <sup>33</sup> | U <sup>23</sup> | U <sup>13</sup> | U <sup>12</sup> |
|-------|-----------------|-----------------|-----------------|-----------------|-----------------|-----------------|
| S(1)  | 120(1)          | 115(1)          | 54(1)           | 5(1)            | -2(1)           | 37(1)           |
| F(1)  | 60(1)           | 92(1)           | 68(1)           | 4(1)            | 4(1)            | -12(1)          |
| F(2)  | 158(2)          | 195(3)          | 53(1)           | 1(1)            | -4(1)           | 43(2)           |
| O(1)  | 112(2)          | 230(4)          | 77(2)           | 25(2)           | 5(1)            | 72(2)           |
| O(2)  | 227(4)          | 85(2)           | 90(2)           | 15(2)           | 10(2)           | 23(2)           |
| C(1)  | 68(2)           | 55(2)           | 56(2)           | 1(1)            | 3(1)            | 1(1)            |
| C(2)  | 95(2)           | 63(2)           | 56(2)           | -2(1)           | 13(2)           | -4(2)           |
| C(3)  | 112(3)          | 73(2)           | 46(2)           | 5(1)            | -7(2)           | -18(2)          |
| C(4)  | 81(2)           | 77(2)           | 65(2)           | 9(2)            | -20(2)          | -7(2)           |
| C(5)  | 59(2)           | 64(2)           | 59(2)           | 1(1)            | -6(1)           | -2(1)           |
| C(6)  | 58(1)           | 43(1)           | 51(1)           | 3(1)            | -3(1)           | -2(1)           |
| C(7)  | 54(1)           | 43(1)           | 51(1)           | 0(1)            | -3(1)           | 0(1)            |
| C(8)  | 56(1)           | 58(2)           | 56(2)           | 0(1)            | 0(1)            | -5(1)           |
| C(9)  | 62(2)           | 65(2)           | 56(2)           | 1(1)            | 6(1)            | -5(1)           |
| C(10) | 64(2)           | 57(2)           | 50(1)           | 0(1)            | -1(1)           | 5(1)            |
| C(11) | 56(2)           | 56(2)           | 60(2)           | -4(1)           | -11(1)          | -2(1)           |
| C(12) | 49(1)           | 54(1)           | 54(1)           | 5(1)            | 3(1)            | 0(1)            |
| C(13) | 77(2)           | 79(2)           | 57(2)           | -8(1)           | -2(1)           | 6(2)            |
| C(14) | 139(3)          | 101(3)          | 76(2)           | -29(2)          | -4(2)           | -11(3)          |

**Table 13.** Hydrogen coordinates ( $\times 10^4$ ) and isotropic displacement parameters ( $\text{\AA}^2 \times 10^3$ ) for mo\_d8v21634\_0m.

|        | x     | y    | z    | U(eq) |
|--------|-------|------|------|-------|
| H(1)   | 5276  | 1265 | 4694 | 72    |
| H(2)   | 4583  | 897  | 3891 | 85    |
| H(3)   | 1240  | 1688 | 3526 | 93    |
| H(4)   | -1376 | 2926 | 3960 | 91    |
| H(5)   | -744  | 3266 | 4764 | 74    |
| H(8)   | -155  | 1592 | 5519 | 69    |
| H(9)   | 367   | 2065 | 6316 | 73    |
| H(11)  | 6254  | 4130 | 6152 | 70    |
| H(13)  | 2195  | 3403 | 6970 | 86    |
| H(14A) | 4502  | 5489 | 7324 | 159   |
| H(14B) | 3579  | 6254 | 6834 | 159   |
| H(14C) | 5951  | 5477 | 6894 | 159   |

**Table S14.** Torsion angles [°] for mo\_d8v21634\_0m.

---

|                         |           |
|-------------------------|-----------|
| C(6)-C(1)-C(2)-C(3)     | 0.2(4)    |
| C(1)-C(2)-C(3)-C(4)     | 0.9(5)    |
| C(2)-C(3)-C(4)-C(5)     | -1.4(5)   |
| C(3)-C(4)-C(5)-C(6)     | 0.9(5)    |
| C(2)-C(1)-C(6)-C(5)     | -0.7(4)   |
| C(2)-C(1)-C(6)-C(7)     | 179.9(2)  |
| C(4)-C(5)-C(6)-C(1)     | 0.2(4)    |
| C(4)-C(5)-C(6)-C(7)     | 179.6(3)  |
| C(1)-C(6)-C(7)-C(8)     | -137.1(3) |
| C(5)-C(6)-C(7)-C(8)     | 43.5(3)   |
| C(1)-C(6)-C(7)-C(12)    | 44.1(4)   |
| C(5)-C(6)-C(7)-C(12)    | -135.3(3) |
| C(12)-C(7)-C(8)-C(9)    | 1.1(4)    |
| C(6)-C(7)-C(8)-C(9)     | -177.8(2) |
| C(7)-C(8)-C(9)-C(10)    | 0.5(4)    |
| C(8)-C(9)-C(10)-C(11)   | -1.0(4)   |
| C(8)-C(9)-C(10)-C(13)   | 178.1(3)  |
| C(9)-C(10)-C(11)-C(12)  | -0.2(4)   |
| C(13)-C(10)-C(11)-C(12) | -179.2(2) |
| C(10)-C(11)-C(12)-F(1)  | -179.0(2) |
| C(10)-C(11)-C(12)-C(7)  | 1.9(4)    |
| C(8)-C(7)-C(12)-F(1)    | 178.6(2)  |
| C(6)-C(7)-C(12)-F(1)    | -2.5(4)   |
| C(8)-C(7)-C(12)-C(11)   | -2.3(4)   |
| C(6)-C(7)-C(12)-C(11)   | 176.5(2)  |
| C(9)-C(10)-C(13)-C(14)  | -133.3(3) |
| C(11)-C(10)-C(13)-C(14) | 45.7(4)   |
| C(9)-C(10)-C(13)-S(1)   | 101.7(3)  |
| C(11)-C(10)-C(13)-S(1)  | -79.3(3)  |
| O(1)-S(1)-C(13)-C(14)   | -61.1(3)  |
| O(2)-S(1)-C(13)-C(14)   | 172.4(3)  |
| F(2)-S(1)-C(13)-C(14)   | 58.0(3)   |
| O(1)-S(1)-C(13)-C(10)   | 66.6(3)   |
| O(2)-S(1)-C(13)-C(10)   | -60.0(3)  |
| F(2)-S(1)-C(13)-C(10)   | -174.4(2) |

---

Symmetry transformations used to generate equivalent atoms:

**Table S15.** Hydrogen bonds for mo\_d8v21634\_0m [ $\text{\AA}$  and  $^\circ$ ].

| D-H...A | d(D-H) | d(H...A) | d(D...A) | <(DHA) |
|---------|--------|----------|----------|--------|
|---------|--------|----------|----------|--------|
